# Supplementary material for: Ultra-large chemical libraries for the discovery of high-affinity peptide binders
Source: PubMed Central journal article supplement (PMC7311396; doi:10.1038/s41467-020-16920-3), 2020-06-23
Supplement: 41467_2020_16920_MOESM1_ESM.pdf [file 41467_2020_16920_MOESM1_ESM.pdf]

# **Ultra-large chemical libraries for the discovery of high-affinity peptide binders**

Quartararo et al.

Supplementary Information

## **Supplementary Notes**

### **Supplementary Note 1: Theoretical diversity vs. sampling diversity**

Given the large theoretical diversity of this library relative to the diversity sampled (limited by the number of beads used in split-and-pool synthesis), it is unlikely the full HA epitope would be rediscovered. There is a 0.001% chance of finding a given 9-mer sequence in a library comprising  $2 \times 10^6$  random 9-mers, with 18 possible monomers at each position (theoretical diversity =  $2 \times 10^{11}$ ).

## **Supplementary Note 2: Probability of identifying a DXXDY(A/S)-containing peptide**

The probability of any given sequence exhibiting the DXXDY(A/S) motif in a particular frame is equal to  $(1/18)^3 \times (2/18)$ , or  $1.9 \times 10^{-5}$ . With 9 varied positions, this motif can exist in four distinct frames; therefore the probability of finding this motif in any frame is equal to  $7.6 \times 10^{-5}$ . In a library of  $2 \times 10^6$  members, there should then exist approximately 152 sequences containing DXXDY(A/S).

## **Supplementary Methods**

### **Solid phase peptide synthesis (SPPS) of anti-hemagglutinin (HA) epitope and analogues:**

Peptide- $\alpha$ -carboxamides were synthesized on a 0.1 mmol scale, using H-Rink amide-ChemMatrix resin (0.45 mmol/g), using either fully automated<sup>1</sup> or manual<sup>2</sup> “fast flow” Fmoc-SPPS.

For automated syntheses: syntheses were carried out at 90 °C. Amide bond formation was effected in 8 s, and Fmoc removal was carried out in 8 s with 20% (v/v) piperidine in DMF. Individual cycle times were each about 40 s.

For manual flow-based syntheses: reagents and solvents were delivered to a stainless steel reactor, which contained the resin, by either an HPLC pump (DMF or 20% (v/v) piperidine in DMF) or a syringe pump (active esters of Fmoc-amino acids). The reactor was submerged in a water bath for the duration of the synthesis and the temperature was maintained at 70 °C. The procedure for each coupling cycle included: a 30 second coupling with a mixture of Fmoc-protected amino acid (1 mmol), HBTU (0.95 mmol), and diisopropylethyl amine (DIEA; 2.9 mmol, 500  $\mu$ L) in 2.5 mL of DMF, at a flow rate of 6 mL/min (for the coupling of tryptophan and histidine, 190  $\mu$ L of DIEA was used to minimize racemization); 1 min DMF wash, at a flow rate of 20 mL/min; 20 second deprotection with 20% (v/v) piperidine in DMF, at a flow rate of 20 mL/min; and 1 minute DMF wash, at a flow rate of 20 mL/min.

After each synthesis was complete, resins were washed with DCM (5x) and dried under reduced pressure.

Global side chain deprotection and cleavage from solid support were carried out by treatment of dry resin with a solution of 94% (v/v) TFA, 2.5% (v/v) ethanedithiol, 2.5% (v/v) water, and 1.0% (v/v) triisopropylsilane, for 2 h at ambient temperature (~1.5 mL of deprotection solution/50 mg of resin). TFA was then evaporated under a stream of nitrogen, and crude peptide was precipitated by addition of cold diethyl ether. Precipitated peptide was triturated (3x) with cold diethyl ether, dissolved in 50/50 water/acetonitrile (0.1% TFA), passed through a 0.2  $\mu$ m PTFE syringe filter, and lyophilized.

Crude peptides were purified by semipreparative reverse phase HPLC, using an Agilent mass directed purification system (1260 infinity LC and 6130 single quad MS). For a typical purification, peptides were dissolved in 95/5 water/acetonitrile (0.1% TFA) and passed through a 0.2  $\mu$ m PTFE syringe filter. The resulting peptide solution was then loaded onto a 9.4 x 250 mm column (Agilent Zorbax 300SB-C3; 5  $\mu$ m particle size; 300 Å pore size) and purified using a linear gradient of 1 to 61% acetonitrile (0.1% TFA) over 60 min (4 mL/min flow rate). Fractions containing the desired product were pooled and an aliquot taken for LC-MS analysis. The remainder was lyophilized.

For LC-MS characterization: LC-MS data were acquired using an Agilent 6550 quadrupole time-of-flight LC-MS. Samples were run on an Agilent Zorbac 200SB-C3 column (2.1 x 150 mm, 5  $\mu$ m particle size, 300 Å pore size). Total ion current (TIC) chromatograms were plotted, and mass spectra were integrated over the principal TIC peak, shown below.

### **Competition fluorescence polarization of HA epitope and analogues:**

Solutions of unlabeled peptides (~1 mg/mL each; **Supplementary Table 1**) in 1x PBS was prepared in the presence of 100 nM 12ca5, 1 mg/mL BSA, 0.02% Tween 20 (120  $\mu$ L). Fluorescent competitor was added (YPYDVPDYAK(FITC) $\alpha$ -CONH<sub>2</sub>; 28 nM). The resulting solution was diluted serially (20  $\mu$ L) into 100 nM 12ca5, 28 nM YPYDVPDYAK(FITC) $\alpha$ -CONH<sub>2</sub>, 1 mg/mL BSA, 0.02% Tween 20 in 1x PBS (80  $\mu$ L; 5-fold dilutions). The resulting solutions were transferred to a 96 well plate (Greiner Bio-One; Kremsmünster, Austria; polypropylene, flat-bottom, chimney well), kept under foil (RT), and read after 1 h on a Tecan Infinite M1000 plate reader (470 nm excitation; 517 nm detection; 5 nm bandwidth). The concentration of fluorescent 12CA5 was determined based on absorbance at 490 nm, using  $\epsilon = 76,900 \text{ M}^{-1}\text{cm}^{-1}$ .

**BioLayer Interferometry of 25 nM-affinity 12ca5 ligand:**

Lyophilized peptide FDYEDYAEWKK(biotin) (biotinylated on C-term lysine) was dissolved to 1 mg/mL in 1x PBS and diluted 50-fold into 1 mg/mL BSA, 0.02% Tween-20, 1x PBS ('kinetic buffer') for immobilization onto streptavidin Octet biosensors (ForteBio; Menlo Park, CA). Biolayer interferometry (BLI) assays were performed in 96 well plates (GreinerBio-One; Kremsmünster, Austria; polypropylene, flat-bottom, chimney well) using an Octet Red96 System (ForteBio; Menlo Park, CA). Wells were filled with 200  $\mu$ L of kinetic buffer, peptide solution, or 12ca5 solution (prepared in kinetic buffer). Biotinylated peptide was immobilized onto the streptavidin tip for 120 s. Sensors were then dipped into kinetic buffer for 60 s, 12ca5 solution (1.5  $\mu$ M, 370 nM, or 90 nM) for 300 s, and finally into kinetic buffer for 600 s. Measurements were carried out at 30 °C.

### **Preparation of biotinylated 12ca5:**

Biotin-(PEG)<sub>4</sub>-NHS ester (2.0 mg, 3.3 μmol) was weighed into a plastic tube and dissolved in 1.06 mL of DMF ([Biotin-(PEG)<sub>4</sub>-NHS] = 3.3 mM). Anti-HA antibody (4.71 mg/mL in 1x PBS, 1.06 mL, 33 nmol) was transferred to a plastic tube and to this was added 123 μL of 1M sodium bicarbonate, pH = 8.0. Biotin-(PEG)<sub>4</sub>-NHS ester (3.3 mM in DMF, 53 μL, 170 nmol) was added dropwise to solution of anti-HA antibody, and reaction was placed on a nutating mixer for 2 h at ambient temperature. Reaction was quenched with addition of 20 mM Tris, 150 mM NaCl, pH = 7.5 (4 mL). Mixture was then filtered through a 0.2 μm PTFE syringe filter, and purified by FPLC (ÄKTA Prime Plus Liquid Chromatography System, GE Healthcare). Concentration of biotinylated 12ca5 was measured by absorption at 280 nm, using a determined extinction coefficient of  $2.0 \times 10^5 \text{ M}^{-1}\text{cm}^{-1}$ . Protein was stored at 4 °C and not subjected to freeze-thaw cycles.

## Affinity capture of 12ca5-binding peptides—effect of ligand concentration:

Preparation of 12ca5-functionalized magnetic beads:

100  $\mu\text{L}$  portions of MyOne Streptavidin T1 Dynabeads (10 mg/mL; 1 mg; 0.13 nmol IgG binding capacity) were transferred to 1.7 mL plastic centrifuge tubes, and placed in a magnetic separation rack (New England Biolabs, cat# S1506S). The beads were washed 3 times with 1 mg/mL BSA, 0.02% Tween 20, 1x PBS, and then treated with 100  $\mu\text{L}$  portions of biotinylated 12ca5 (1.5  $\mu\text{M}$ ; 0.15 nmol). The resulting suspensions were transferred to a rotating vertical mixer, and kept for 15 min at ambient temperature. After this time, the beads were returned to the separating rack, the supernatant was removed, and the beads were washed 4 times with 1 mL each of 1 mg/mL BSA, 0.02% Tween 20, 1x PBS.

Affinity capture:

1 mL solutions containing 1 mg/mL BSA, 0.02% Tween 20, 1x PBS, and either 1 nM/peptide (1 pmol) or 10 pM/peptide (10 fmol) 12ca5 control binders (**Supplementary Table 1**) were prepared in 1.7 mL plastic centrifuge tubes, and chilled on ice for 10 min (the 12ca5 binders were added from mixtures containing 1  $\mu\text{M}$ /peptide or 10 nM/peptide in 6 M guanidine hydrochloride, 200 mM phosphate, pH 7 buffer). The resulting chilled solutions were then added to 1 mg portions of 12ca5-functionalized magnetic beads, and the resulting suspensions were kept on a rotating vertical mixer (1 h, in 4 °C cold room).

Elution:

The centrifuge tubes containing the bead suspensions were transferred to the magnetic separation rack. The beads were isolated, and washed 3 times with 1 mL each of chilled 1x PBS (beads were exposed to buffer for a total of ~6 min). Then, each drained bead aliquot was treated with 2 x 150  $\mu\text{L}$  of ‘elution buffer’ (6 M guanidine hydrochloride, 200 mM phosphate, pH 7.0 buffer containing 1 fmol/ $\mu\text{L}$  Peptide Retention Time Calibration Standard (PRTC; Pierce, cat# 88320; for use as an internal reference in MS-based quantitation)).

Preparation of ‘reference’ samples:

1 pmol and 10 fmol/peptide ‘reference’ samples were prepared by dilution of 1  $\mu\text{M}$ /peptide or 10 nM/peptide 12ca5 binder mixture stock solutions (in 6 M guanidine hydrochloride, 200 mM phosphate, pH 7 buffer) into 300  $\mu\text{L}$  of ‘elution buffer’. These samples contained the amount of peptide that would be present in elution, if 100% of the peptide were retained by affinity capture.

NanoLC-MS:

5  $\mu\text{L}$  portions of the combined eluates were analyzed by nanoLC-MS, alongside 5  $\mu\text{L}$  portions of ‘reference’ samples (16.7 fmol/peptide or 167 amol/peptide loading for ‘1



nM' or '10 pM' conditions, respectively). Analysis was performed on an EASY-nLC 1200 (Thermo Fisher Scientific) nano-liquid chromatography handling system connected to an Orbitrap Fusion Lumos Tribrid Mass Spectrometer (Thermo Fisher Scientific). Samples were run on a PepMap RSLC C18 column (2  $\mu\text{m}$  particle size, 15 cm x 50  $\mu\text{m}$  ID; Thermo Fisher Scientific, P/N ES801). A nanoViper Trap Column (C18, 3  $\mu\text{m}$  particle size, 100  $\text{\AA}$  pore size, 20 mm x 75  $\mu\text{m}$  ID; Thermo Fisher Scientific, P/N 164946) was used for desalting. The standard nano-LC method was run at 40  $^{\circ}\text{C}$  and a flow rate of 300 nL/min with the following gradient: 1% solvent B in solvent A ramping linearly to 61% B in A over 40 or 60 min, where solvent A = water (0.1% FA), and solvent B = 80% acetonitrile, 20% water (0.1% FA). Positive ion spray voltage was set to 2200 V. Orbitrap detection was used for primary MS, with the following parameters: resolution = 120,000; quadrupole isolation; scan range = 200-1400 m/z; RF lens = 30%; AGC target =  $1 \times 10^6$ ; maximum injection time = 100 ms; 1 microscan.

Generation of dose-response curve:

A dose-response curve was generated by analyzing 5  $\mu\text{L}$  portions of the 'reference samples', containing 16.7 fmol/peptide, 1.67 fmol/peptide, or 167 amol/peptide. MS detector counts for each peptide were determined from the apex of extracted ion current chromatograms, and plotted vs. sample loading to verify the linearity of response over the sample loading range of interest.

Quantitation of sample recovery:

MS detector counts for each peptide were determined from the apex of extracted ion current chromatograms. Recoveries were taken as the ratio of counts for samples obtained by affinity selection vs. the 'reference' samples. To account for run-to-run variability, these ratios were adjusted based on the counts obtained for internal standard (Peptide Retention Time Calibration Standard).

## **Affinity capture of 12ca5-binding peptides—effect of capture protocol:**

‘Direct capture’ with 12ca5-functionalized magnetic beads:

Preparation of 12ca5-functionalized magnetic beads was carried out as in **Affinity capture of 12ca5-binding peptides—effect of ligand concentration**. Affinity capture treatments were performed as in **Affinity capture of 12ca5-binding peptides—effect of ligand concentration**, from 1 mL volumes of 1 nM, 100 pM, or 10 pM/peptide mixtures of 12ca5-binding peptides (**Supplementary Table 1**).

‘Indirect capture’ by treatment with 12ca5-biotin:

1 mL solutions containing 1 mg/mL BSA, 0.02% Tween 20, 1x PBS, and either 1 nM, 100 pM, or 10 pM/peptide 12ca5 control binders (**Supplementary Table 1**) were prepared in 1.7 mL plastic centrifuge tubes. The solutions were chilled on ice for 10 min, 12ca5-biotin was added (100 nM; 100 pmol), and the resulting solutions were kept on a rotating vertical mixer (in 4 °C cold room). After 1 h, 1 mg portions of MyOne Streptavidin T1 Dynabeads (0.13 nmol IgG binding capacity) were added in 100 µL each of 1 mg/mL BSA, 0.02% Tween 20, 1x PBS. The resulting solutions were kept for 15 min (rotating vertical mixer, in 4 °C cold room).

Elution, nanoLC-MS analyses of elution and ‘reference’ samples, and quantitation were performed as in **Affinity capture of 12ca5-binding peptides—effect of ligand concentration**.

## Affinity capture of 12ca5-binding peptides—effect of magnetic bead concentration:

‘Direct capture’ with 12ca5-functionalized magnetic beads:

100  $\mu$ L (1 mg; 0.13 nmol IgG binding capacity) or 1 mL (10 mg; 1.3 nmol IgG binding capacity) portions of MyOne Streptavidin T1 Dynabeads (10 mg/mL); were transferred to 1.7 mL plastic centrifuge tubes, and placed in a magnetic separation rack. The beads were washed 3 times with 1 mg/mL BSA, 0.02% Tween 20, 1x PBS, and then treated with 100  $\mu$ L or 1 mL portions of biotinylated 12ca5 (1.5  $\mu$ M; 0.15 nmol or 1.5 nmol). The resulting suspensions were transferred to a rotating vertical mixer, and kept for 15 min at ambient temperature. After this time, the beads were returned to the separating rack, the supernatant was removed, and the beads were washed 4 x 1 mL each with 1 mg/mL BSA, 0.02% Tween 20, 1x PBS.

Affinity capture was performed from 1 mL solutions containing 1 mg/mL BSA, 0.02% Tween 20, 1x PBS, and 1 nM/peptide (1 pmol) 12ca5 control binders (**Supplementary Table 1**). Elution, nanoLC-MS analyses of elution and ‘reference’ samples, and quantitation were performed as in **Affinity capture of 12ca5-binding peptides—effect of ligand concentration**. (Note: raw ion counts were not normalized, as PRTC was absent from the ‘reference’ samples. Counts for a PRTC ion are shown in **Supplementary Fig. 10** to illustrate the degree of run-to-run variability in MS response.)

‘Indirect capture’:

1 mL solutions containing 1 mg/mL BSA, 0.02% Tween 20, 1x PBS, and 1 nM/peptide 12ca5 control binders (**Supplementary Table 1**) were prepared in 1.7 mL plastic centrifuge tubes. The solutions were chilled on ice for 10 min, 12ca5-biotin was added to either 100 (100 pmol) or 1  $\mu$ M (1 nmol), and the resulting solutions were kept on a rotating vertical mixer (in 4 °C cold room). After 1 h, 1 mg (0.13 nmol IgG binding capacity) or 10 mg (1.3 nmol IgG binding capacity) portions of MyOne Streptavidin T1 Dynabeads were added in 100  $\mu$ L each of 1 mg/mL BSA, 0.02% Tween 20, 1x PBS. The resulting solutions were kept for 15 min (rotating vertical mixer, in 4 °C cold room).

Elution, nanoLC-MS analyses of elution and ‘reference’ samples, and quantitation were performed as in **Affinity capture of 12ca5-binding peptides—effect of ligand concentration**. (Note the caveat above, under ‘direct capture’.)

**Affinity capture of 12ca5-binding peptides—effect of ligand concentration, with concentration of eluate:**

‘Direct’ affinity capture was performed as in **Affinity capture of 12ca5-binding peptides—effect of ligand concentration**, from 1 mL solutions containing 1 mg/mL BSA, 0.02% Tween 20, 1x PBS, and either 10 pM/peptide (10 fmol) or 1 pM/peptide (1 fmol) of 12ca5 control binders (**Supplementary Table 1**). The resulting elutions (300  $\mu$ L each) were concentrated by solid phase extraction using C18 ZipTip® cartridges (0.6  $\mu$ L, MilliporeSigma, P/N ZTC18S096). This involved: 1) wetting the bonded phase with 80  $\mu$ L of acetonitrile (0.08% trifluoroacetic acid); 2) equilibration with 3 x 80  $\mu$ L of water (0.1% trifluoroacetic acid); 3) loading the affinity capture eluate (300  $\mu$ L); 4) de-salting with 3 x 80  $\mu$ L of water (0.1% trifluoroacetic acid); and 5) elution with 50  $\mu$ L of 50/50 water (0.1 % trifluoroacetic acid)/acetonitrile (0.08% trifluoroacetic acid) containing 100 mM guanidine hydrochloride, 3.3 mM phosphate). Elutions were collected in 1.7 mL plastic tubes, and lyophilized to give white pellets that were reconstituted in 6  $\mu$ L each of water (0.1% formic acid). nLC-MS analysis was performed using 5  $\mu$ L injections of each sample.

## Preparation of $2 \times 10^6$ , $2 \times 10^7$ , and $2 \times 10^8$ -member (X)<sub>9</sub>K-CONH<sub>2</sub> libraries:

Library design: (X)<sub>9</sub>K-CONH<sub>2</sub>

SPPS:

2.9 g of 30  $\mu$ m TentaGel resin (0.26 mmol/g, 0.74 mmol,  $2 \times 10^8$  beads) was transferred to a 100 mL peptide synthesis vessel, swollen in DMF, and then washed with DMF (3x). Fmoc-Rink amide linker (2.0 g, 3.71 mmol, 5 eq) was dissolved in HATU solution (0.38 M in DMF, 8.8 mL, 3.4 mmol), activated with DIEA (1.86 mL, 10.7 mmol) immediately prior to coupling, and added to resin bed. Coupling was performed for 20 min; after this time, resin was washed with DMF (100 mL). Fmoc removal was carried out by treatment of resin with 20% piperidine in DMF (1 x 50 mL flow wash; 2 x 50 mL, 5 min batch treatments). Resin was then washed with DMF (150 mL). Coupling of Fmoc-Lys(Boc)-OH, subsequent Fmoc removal, and DMF washes were performed in the same manner.

At this stage, resin was suspended in DMF (50 mL), and divided evenly among 18 x 10 mL fritted plastic syringes using a 5 mL Eppendorf pipette. Couplings were performed as follows: Fmoc-protected amino acids (0.4 mmol) in HATU solution (0.38M, 980  $\mu$ L, 0.37 mmol) were activated with DIEA (206  $\mu$ L, 1.2 mmol). Each of the following amino acid derivatives was added to a single portion of resin (theory: 180 mg resin, 40  $\mu$ mol): Fmoc-Ala-OH, Fmoc-Asp(OtBu)-OH, Fmoc-Glu(OtBu)-OH, Fmoc-Phe-OH, Fmoc-Gly-OH, Fmoc-His(Boc)-OH, Fmoc-Lys(Boc)-OH, Fmoc-Leu-OH, Fmoc-Met-OH, Fmoc-Asn(Trt)-OH, Fmoc-Pro-OH, Fmoc-Gln(Trt)-OH, Fmoc-Arg(Pbf)-OH, Fmoc-Ser(tBu)-OH, Fmoc-Thr(tBu)-OH, Fmoc-Val-OH, Fmoc-Trp(Boc)-OH, and Fmoc-Tyr(tBu)-OH. After coupling for 20 min, resins were washed with DMF (~10 mL ea.), poured back into a 100 mL synthesis vessel, and washed with DMF (100 mL). Fmoc removal was carried out by treatment of resin with 20% piperidine in DMF (1 x 50 mL flow wash; 2 x 50 mL, 5 min batch treatments), and resin was washed with DMF (150 mL). Nine cycles of split-and-pool synthesis were performed using this procedure.

Following removal of the N-terminal Fmoc group, the resin was washed with DMF (150 mL), and a small portion was transferred to a plastic fritted syringe, washed with DCM (~ 10 mL), and dried under reduced pressure. 1.0 mg of resin was weighed into a plastic tube (theory:  $4.7 \times 10^4$  beads) and set aside for later characterization (described in **Characterization of  $2 \times 10^6$ ,  $2 \times 10^7$ , and  $2 \times 10^8$ -member (X)<sub>9</sub>K-CONH<sub>2</sub> libraries**). The remainder was resuspended in DMF and pooled back with the bulk of the library.

Portioning:

Resin was suspended in DMF (~50 mL) and divided evenly among 11 x 10 mL fritted plastic syringes. One of these portions of resin was held aside, and the remainder pooled back together (theory:  $1.8 \times 10^8$  beads). The portion that was held aside was further divided evenly among 11 x 10 mL fritted plastic syringes. One of these portions was in turn held aside (theory:  $1.7 \times 10^6$  beads), and the remainder was pooled back together (theory:  $1.7 \times 10^7$  beads). These three portions of resin represent approximate  $2 \times$

$10^8$ ,  $2 \times 10^7$ , and  $2 \times 10^6$ -member libraries. Resins were each washed with DCM (~50 mL) in fritted plastic syringes and dried under reduced pressure.

#### Cleavage from resin:

Libraries were globally deprotected and cleaved from resin by treatment of dry resin with a solution of 94% (v/v) TFA, 2.5% (v/v) ethanedithiol, 2.5% (v/v) water, and 1.0% (v/v) triisopropylsilane, for 3 h at ambient temperature. TFA was then evaporated under a stream of nitrogen, and crude peptide was precipitated by addition of cold diethyl ether. Precipitated peptide was triturated (3x) with cold diethyl ether, dissolved in 30/70 water/acetonitrile (0.1% TFA), passed through a 0.2  $\mu\text{m}$  PTFE syringe filter, and lyophilized.

#### Solid phase extraction:

The  $2 \times 10^8$ -member library (200 mg) was dissolved in 20 mL of 95/5 water/acetonitrile (0.1% TFA); the entirety of the isolated  $2 \times 10^7$  and  $2 \times 10^6$ -member libraries were each dissolved in 5 mL of 95/5 water/acetonitrile (0.1% TFA). Libraries were purified over Bond Elut C18 cartridges (1 g bed mass, 40  $\mu\text{m}$  particle size, 6 mL volume; Agilent, P/N 12256130) as follows: cartridges were first conditioned with methanol (~20 mL), and then equilibrated with 99/1 water/acetonitrile (0.1% TFA) (~20 mL). Sample was then loaded, and cartridges were washed with 99/1 water/acetonitrile (0.1% TFA) (~20 mL). Sample was eluted with 30/70 water/acetonitrile (0.1% TFA) (~20 mL). Elutions from each library were collected and lyophilized.

#### Preparation of stock solutions:

Lyophilized powder of  $2 \times 10^8$ -member library (106 mg) was dissolved in DMF (1.08 mL) and then diluted with 1x PBS (9.76 mL) to bring the final concentration to ~8 mM total peptide (~40 pM/member). Lyophilized powder of  $2 \times 10^7$ -member library (39 mg) was dissolved in DMF (3.96 mL) and diluted with 1x PBS (35.6 mL) to bring the final concentration to ~0.8 mM total peptide (~40 pM/member). Lyophilized powder of  $2 \times 10^6$ -member library was dissolved in DMF (1.09 mL) and diluted with 1x PBS (9.83 mL) to bring the final concentration to ~0.8 mM total peptide (~400 pM/member). Stock solutions were aliquotted out and stored at -80 °C. Aliquots were thawed on ice prior to use.

## Characterization of $2 \times 10^6$ , $2 \times 10^7$ , and $2 \times 10^8$ -member (X)<sub>9</sub>K-CONH<sub>2</sub> libraries:

### Sample preparation:

A 1.0 mg aliquot of library resin (from **Preparation of  $2 \times 10^6$ ,  $2 \times 10^7$ , and  $2 \times 10^8$ -member (X)<sub>9</sub>K-CONH<sub>2</sub> libraries**) was suspended in 1.0 mL of Milli-Q water and sonicated to achieve a homogenous suspension (theory:  $4.7 \times 10^4$  beads/mL). A 20  $\mu$ L aliquot (theory: 940 beads; 4 pmol/peptide) was transferred to a plastic tube, spun down, and supernatant removed. Beads were then subjected to treatment with 100  $\mu$ L of 94% (v/v) TFA, 2.5% (v/v) ethanedithiol, 2.5% (v/v) water, and 1.0% (v/v) triisopropylsilane, for 10 min in a 60 °C water bath. TFA was then evaporated under a stream of nitrogen, and cleaved peptide was resuspended in Milli-Q water (0.1% TFA). Sample was purified over a C18 ZipTip<sup>®</sup> (0.6  $\mu$ L, MilliporeSigma, P/N ZTC18S096), eluted in 30/70 water/acetonitrile (0.1% TFA), and lyophilized. Powder was resuspended in 20  $\mu$ L of Milli-Q water (0.1% FA), and 0.5  $\mu$ L (~100 fmol/peptide) was submitted for nLC-MS/MS analysis.

### NanoLC-MS/MS analysis:

Details of the columns and instruments used for analysis are provided in **Affinity capture of 12ca5-binding peptides—effect of ligand concentration**. The standard nano-LC method was run at 40 °C and a flow rate of 300 nL/min with the following gradient: 1% solvent B in solvent A ramping linearly to 41% B in A over 120 min, where solvent A = water (0.1% FA), and solvent B = 80% acetonitrile, 20% water (0.1% FA). Positive ion spray voltage was set to 2200 V. Orbitrap detection was used for primary MS with the following parameters: resolution = 120,000; quadrupole isolation; scan range = 200-1400 m/z; RF lens = 30%; AGC target =  $1 \times 10^6$ ; maximum injection time = 100 ms; 1 microscan.

Acquisition of secondary MS spectra was done in a data-dependent manner: dynamic exclusion was employed such that a precursor was excluded for 30 s if it was detected four or more times within 30 s (mass tolerance: 10.00 ppm); monoisotopic precursor selection used to select for peptides; intensity threshold was set to  $5 \times 10^4$ ; charge states 2-10 were selected; and precursor selection range was set to 200-1400 m/z. The top 15 most intense precursors that met the preceding criteria were subjected to subsequent fragmentation.

Three fragmentation modes – collision-induced dissociation (CID), higher-energy collisional dissociation (HCD), and electron-transfer/higher-energy collisional dissociation (EThcD) – were used for acquisition of secondary MS spectra. Only precursors with charge states 3 and above were subjected to all three fragmentation modes; precursors with charge states of 2 were subjected to CID and HCD only. For all three modes, detection was performed in the Orbitrap (resolution = 30,000; quadrupole isolation; isolation window = 1.3 m/z; AGC target =  $2 \times 10^4$ ; maximum injection time = 100 ms; 1 microscan). For CID, a collision energy of 30% was used. For HCD, a collision energy of 25% was used. For EThcD, a supplemental activation collision energy of 25% was used.

*De novo* peptide sequencing:

*De novo* peptide sequencing was performed by processing .raw files obtained from Orbitrap analysis using PEAKS Studio (version 8.5) from Bioinformatics Solutions Inc. (ON, Canada). HCD and CID scans were merged within a 0.2 minute and 0.02 Da window, mass precursor correction was used, and primary mass filtration was employed as appropriate. Auto *de novo* sequencing was performed using a 15 ppm precursor mass error and 0.02 Da fragment mass error, and with the following modifications: fixed C-term amidation (-0.98 Da) on lysine, and variable oxidation on methionine (+15.99 Da). 15 candidate sequences were obtained for each preprocessed scan. Post-*de novo* data analysis was performed as described in Vinogradov, A. V. *et. al.* Library design-facilitated high-throughput sequencing of synthetic peptide libraries. *ACS Comb. Sci.* **19** 694-701 (2017).<sup>3</sup>



## Affinity selections of $2 \times 10^6$ , $2 \times 10^7$ , and $2 \times 10^8$ -member libraries against 12ca5:

Preparation of 12ca5-functionalized magnetic beads:

MyOne Streptavidin T1 Dynabeads (300  $\mu$ L of 10 mg/mL stock) were transferred to 1.7 mL plastic centrifuge tubes, and placed in a magnetic separation rack. Beads were washed 3 x 1 mL w/ 10% FBS, 0.02% Tween 20, 1x PBS, and then treated with 300  $\mu$ L of biotinylated 12ca5 (1.5  $\mu$ M; 0.45 nmol). The resulting suspensions were transferred to a rotating vertical mixer and allowed to incubate for 1 h at 4°C. After this time, the beads were returned to the separating rack, the supernatant was removed, and the beads were washed 3 x 1 mL w/ 10% FBS, 0.02% Tween 20, 1x PBS. Beads were resuspended in 300  $\mu$ L of 10% FBS, 0.02% Tween 20, 1x PBS.

Affinity capture:

Library (10 fmol/member) was incubated with 100  $\mu$ L (1 mg) portions of protein-immobilized magnetic beads (prepared above) in the presence of 10% FBS, 1x PBS (final volume: 1 mL) on a rotating mixer for 1 h at 4 °C. Final conditions: 1 mg/mL magnetic beads, 10 pM/member library.

Elution:

The centrifuge tubes containing the bead suspensions were transferred to the magnetic separation rack. The beads were washed 3 x 1 mL w/ 1x PBS. Bound peptides were eluted with 2 x 100  $\mu$ L 6M guanidine hydrochloride, 200 mM phosphate, pH 6.8. Eluates were concentrated via C18 ZipTip® pipette tips (as described in **Affinity capture of 12ca5-binding peptides—effect of ligand concentration, with concentration of eluate**) and lyophilized.

NanoLC-MS/MS:

Powders were resuspended in 6  $\mu$ L water (0.1% formic acid), and 5  $\mu$ L submitted for nLC-MS/MS analysis. Analysis was performed as described in **Characterization of  $2 \times 10^6$ ,  $2 \times 10^7$ , and  $2 \times 10^8$ -member (X)<sub>9</sub>K-CONH<sub>2</sub> libraries**.

### **SPPS of HA epitope Ala scan mutants:**

Peptides were synthesized on a fully automated fast-flow peptide synthesizer as described in **Solid phase peptide synthesis (SPPS) of anti-hemagglutinin (HA) epitope and analogues**. Concomitant side chain deprotection and cleavage from resin, as well as HPLC purification and LC-MS analysis, were also carried out as described in **Solid phase peptide synthesis (SPPS) of anti-hemagglutinin (HA) epitope and analogues**.

**Competition fluorescence polarization of HA epitope Ala scan mutants:**

Competition fluorescence polarization experiments were carried out as described in **Competition fluorescence polarization of HA epitope and analogues**.

### **Investigation of enrichment vs. sample loading:**

MyOne Streptavidin T1 Dynabeads (3 mg) were washed 3 x 1 mL w/ 10% FBS/1x PBS. Beads were then incubated with biotinylated 12ca5 (0.13 nmol of protein per 1 mg of magnetic beads) for 1 h at 4°C, and washed 3 x 1 mL w/ 10% FBS/1x PBS. For each replicate (3 total): library (200 fmol/member) was incubated with 1 mg protein-immobilized magnetic beads in the presence of 10% FBS/1x PBS (final volume: 1 mL) for 1 h at 4°C. Final screening conditions: 100 nM protein, 1 mg/mL magnetic beads, 200 pM/member library. Beads were washed 3 x 1 mL w/ 1x PBS. Bound peptides were eluted with 2 x 100 µL 6M Guan•HCl, 200 mM phosphate, pH 6.8. Eluates were concentrated via ZipTip and lyophilized. Powders were resuspended in 13.3 µL of water (0.1% FA), 6.3 µL was removed for later analysis (theory: 15 fmol library member/µL). Remaining 7 µL were diluted into 14 µL of water (0.1% FA), and 10 µL was removed for later analysis (theory: 5 fmol library member/µL). Finally, remaining 11 µL were diluted into 22 µL of water (0.1% FA), and 10 µL was removed for later analysis (theory: 1.7 fmol library member/µL). 5 µL of each dilution were submitted for nLC-MS/MS analysis, giving theoretical injection amounts (assuming 100% recovery of peptide) of 8.3 fmol, 25 fmol, and 75 fmol library member, respectively.

## Preparation of a $1 \times 10^9$ -member (X)<sub>9</sub>K-CONH<sub>2</sub> library:

Library design: (X)<sub>9</sub>K-CONH<sub>2</sub>

### SPPS:

5.4 g of 20  $\mu$ m TentaGel resin (0.26 mmol/g, 1.4 mmol,  $1.3 \times 10^9$  beads) was transferred to a 100 mL peptide synthesis vessel, swollen in DMF, and then washed with DMF (3x). Fmoc-Rink amide linker (3.8 g, 7.0 mmol, 5 eq) was dissolved in HATU solution (0.38 M in DMF, 16.7 mL, 6.4 mmol), activated with DIEA (3.5 mL, 20 mmol) immediately prior to coupling, and added to resin bed. Coupling was performed for 20 min; after this time, resin was washed with DMF (100 mL). Fmoc removal was carried out by treatment of resin with 20% piperidine in DMF (1 x 50 mL flow wash; 2 x 50 mL, 5 min batch treatments). Resin was then washed with DMF (150 mL). Coupling of Fmoc-Lys(Boc)-OH, subsequent Fmoc removal, and DMF washes were performed in the same manner.

At this stage, resin was suspended in DMF (50 mL), and divided evenly among 18 x 10 mL fritted plastic syringes using a 5 mL Eppendorf pipette. Couplings were performed as follows: Fmoc-protected amino acids (0.8 mmol) in HATU solution (0.38M, 1.86 mL, 0.71 mmol) were activated with DIEA (391  $\mu$ L, 2.3 mmol). Each of the amino acid derivatives listed in **Preparation of  $2 \times 10^6$ ,  $2 \times 10^7$ , and  $2 \times 10^8$ -member (X)<sub>9</sub>K-CONH<sub>2</sub> libraries** was added to a single portion of resin (theory:  $\sim 330$  mg resin, 80  $\mu$ mol). Couplings were performed for 20 min. Remainder of split-and-pool synthesis (nine rounds total) was completed according to the procedure outlined in **Preparation of  $2 \times 10^6$ ,  $2 \times 10^7$ , and  $2 \times 10^8$ -member (X)<sub>9</sub>K-CONH<sub>2</sub> libraries**.

Following removal of the N-terminal Fmoc group, the resin was washed with DMF (150 mL), and a small portion was transferred to a plastic fritted syringe, washed with DCM ( $\sim 10$  mL), and dried under reduced pressure. 1.0 mg of resin was weighed into a plastic tube (theory:  $1.6 \times 10^5$  beads) and set aside for later characterization (described in **Characterization of a  $1 \times 10^9$ -member (X)<sub>9</sub>K-CONH<sub>2</sub> library**). The remainder was resuspended in DMF and pooled back with the bulk of the library.

### Portioning:

Resin was suspended in DMF ( $\sim 50$  mL) and divided evenly among 11 x 10 mL fritted plastic syringes. One of these portions of resin was held aside (theory:  $1.2 \times 10^8$  beads), and the remainder pooled back together (theory:  $1.2 \times 10^9$  beads). These two portions of resin represent approximate  $1 \times 10^9$  and  $1 \times 10^8$ -member libraries. Resins were each washed with DCM ( $\sim 50$  mL) in fritted plastic syringes and dried under reduced pressure.

### Cleavage from resin and solid phase extraction:

Libraries were globally deprotected and cleaved from resin as described in **Preparation of  $2 \times 10^6$ ,  $2 \times 10^7$ , and  $2 \times 10^8$ -member (X)<sub>9</sub>K-CONH<sub>2</sub> libraries**. Crude, lyophilized powders were resuspended in 95/5 water/acetonitrile (0.1% TFA), and

purified over Supelclean™ LC-18 SPE cartridges (2 g bed mass, 45 μm particle size, 12 mL; Millipore Sigma, P/N 57117). Procedure is described in **Preparation of 2 x 10<sup>6</sup>, 2 x 10<sup>7</sup>, and 2 x 10<sup>8</sup>-member (X)<sub>9</sub>K-CONH<sub>2</sub> libraries.**

Preparation of stock solutions:

Lyophilized powder of 10<sup>9</sup>-member library (127 mg) was dissolved in DMF (1.3 mL) and then diluted with 1x PBS (11.7 mL) to a final concentration of 8 mM total peptide (~6 pM/member). Lyophilized powder of 10<sup>8</sup>-member library (110 mg) was dissolved in DMF (1.2 mL) and diluted with 1x PBS (10.1 mL) to a final concentration of 8 mM total peptide (~60 pM/member). Stock solutions were aliquotted out and stored at -80 °C. Aliquots were thawed on ice prior to use.

## Characterization of a $1 \times 10^9$ -member (X)<sub>9</sub>K-CONH<sub>2</sub> library

### Sample preparation:

A 1.0 mg aliquot of library resin (from **Preparation of a  $1 \times 10^9$ -member (X)<sub>9</sub>K-CONH<sub>2</sub> library**) was suspended in 1.0 mL of Milli-Q water and sonicated to achieve a homogenous suspension (theory:  $1.6 \times 10^5$  beads/mL). A 5  $\mu$ L aliquot (theory: 805 beads; 1 pmol/peptide) was transferred to a plastic tube, spun down, and supernatant removed. Beads were then subjected to treatment with 94% (v/v) TFA, 2.5% (v/v) ethanedithiol, 2.5% (v/v) water, and 1.0% (v/v) triisopropylsilane, for 10 min in a 60 °C water bath. TFA was then evaporated under a stream of nitrogen, and cleaved peptide was resuspended in Milli-Q water (0.1% TFA). Sample was purified over a C18 ZipTip<sup>®</sup> (0.6  $\mu$ L, MilliporeSigma, P/N ZTC18S096), eluted in 30/70 water/acetonitrile (0.1% TFA), and lyophilized. Powder was resuspended in 13  $\mu$ L of Milli-Q water (0.1% FA), and 1  $\mu$ L (~100 fmol/peptide) was submitted for nLC-MS/MS analysis.

### NanoLC-MS/MS analysis and *de novo* peptide sequencing:

Analysis and *de novo* sequencing was performed as described in **Characterization of  $2 \times 10^6$ ,  $2 \times 10^7$ , and  $2 \times 10^8$ -member (X)<sub>9</sub>K-CONH<sub>2</sub> libraries**.

## **Affinity selections of $10^8$ and $10^9$ -member libraries against 12ca5—effect of library diversity:**

Preparation of 12ca5-functionalized magnetic beads:

MyOne Streptavidin T1 Dynabeads were functionalized with biotinylated 12ca5 as described in **Affinity selections of  $2 \times 10^6$ ,  $2 \times 10^7$ , and  $2 \times 10^8$ -member libraries against 12ca5.**

Affinity capture:

$10^9$ -member library (2 fmol/member),  $10^8$ -member portion (10 fmol/member), or  $10^8$ -member library from **Preparation of  $2 \times 10^6$ ,  $2 \times 10^7$ , and  $2 \times 10^8$ -member (X)<sub>9</sub>K-CONH<sub>2</sub> libraries** (2 fmol/member) was incubated with 100  $\mu$ L (1 mg) portions of protein-immobilized magnetic beads in the presence of 10% FBS, 1x PBS (final volume: 1 mL) on a rotating mixer for 1 h at 4 °C. Final conditions: 1 mg/mL magnetic beads, 2 pM/member or 10 pM/member library.

Elution and nanoLC-MS/MS:

Bound peptides were eluted as described in **Affinity selections of  $2 \times 10^6$ ,  $2 \times 10^7$ , and  $2 \times 10^8$ -member libraries against 12ca5.** NanoLC-MS/MS analysis was performed as described in **Characterization of  $2 \times 10^6$ ,  $2 \times 10^7$ , and  $2 \times 10^8$ -member (X)<sub>9</sub>K-CONH<sub>2</sub> libraries** and **Affinity selections of  $2 \times 10^6$ ,  $2 \times 10^7$ , and  $2 \times 10^8$ -member libraries against 12ca5.**



**Affinity selections of  $10^8$  and  $10^9$ -member libraries against 12ca5—effect of increased starting material of library:**

Preparation of 12ca5-functionalized magnetic beads:

MyOne Streptavidin T1 Dynabeads were functionalized with biotinylated 12ca5 as described in **Affinity selections of  $2 \times 10^6$ ,  $2 \times 10^7$ , and  $2 \times 10^8$ -member libraries against 12ca5.**

Affinity capture:

$10^9$ -member library (1 fmol/member, 5 fmol/member, or 3 x 4 fmol/member (= 12 fmol/member total)) was incubated with 100  $\mu$ L (1 mg) portions of protein-immobilized magnetic beads in the presence of 10% FBS, 1x PBS (final volume: 1 mL) on a rotating mixer for 1 h at 4 °C. Final conditions: 1 mg/mL magnetic beads; variable concentration of library members.

Elution and nanoLC-MS/MS:

Bound peptides were eluted as described in **Affinity selections of  $2 \times 10^6$ ,  $2 \times 10^7$ , and  $2 \times 10^8$ -member libraries against 12ca5.** For the 12 fmol/member condition, eluates from each 4 fmol/member selection were combined and concentrated as described in **Affinity capture of 12ca5-binding peptides—effect of ligand concentration, with concentration of eluate.** NanoLC-MS/MS analysis was performed as described in **Characterization of  $2 \times 10^6$ ,  $2 \times 10^7$ , and  $2 \times 10^8$ -member (X)<sub>9</sub>K-CONH<sub>2</sub> libraries and Affinity selections of  $2 \times 10^6$ ,  $2 \times 10^7$ , and  $2 \times 10^8$ -member libraries against 12ca5.**

**Affinity selections of  $10^8$  and  $10^9$ -member libraries against 12ca5—effect of increased starting material of selection target:**

Preparation of 12ca5-functionalized magnetic beads:

MyOne Streptavidin T1 Dynabeads (1.1 mL of 10 mg/mL stock) were transferred to a 1.7 mL plastic centrifuge tube, and placed in a magnetic separation rack. Beads were washed 3 x 1 mL w/ 10% FBS, 1x PBS, and then treated with 1.0 mL of biotinylated 12ca5 (1.7  $\mu$ M; 1.7 nmol). The resulting suspensions were transferred to a rotating vertical mixer and allowed to incubate for 1 h at 4°C. After this time, the beads were returned to the separating rack, the supernatant was removed, and the beads were washed 3 x 1 mL w/ 10% FBS, 1x PBS. Beads were resuspended in 300  $\mu$ L of 10% FBS, 1x PBS.

Affinity capture:

$10^9$ -member library (2 fmol/member) was incubated with either 100  $\mu$ L (1 mg; 0.13 nmol IgG binding capacity) of 12ca5-immobilized magnetic beads, or 1 mL (10 mg; 1.3 nmol IgG binding capacity) of 12ca5-immobilized magnetic beads, in the presence of 10% FBS, 1x PBS (final volume: 1 mL) on a rotating mixer for 1 h at 4 °C. Final conditions: 1 mg/mL magnetic beads; 2 pM/member library.

Elution and nanoLC-MS/MS:

Bound peptides were eluted as described in **Affinity selections of  $2 \times 10^6$ ,  $2 \times 10^7$ , and  $2 \times 10^8$ -member libraries against 12ca5**. NanoLC-MS/MS analysis was performed as described in **Characterization of  $2 \times 10^6$ ,  $2 \times 10^7$ , and  $2 \times 10^8$ -member (X)<sub>9</sub>K-CONH<sub>2</sub> libraries** and **Affinity selections of  $2 \times 10^6$ ,  $2 \times 10^7$ , and  $2 \times 10^8$ -member libraries against 12ca5**.

**Affinity selections of  $10^8$  and  $10^9$ -member libraries against 12ca5—effect of exogenous competitor on selections from a  $10^8$ -member library:**

Preparation of 12ca5-functionalized magnetic beads:

MyOne Streptavidin T1 Dynabeads were functionalized with biotinylated 12ca5 as described in **Affinity selections of  $2 \times 10^6$ ,  $2 \times 10^7$ , and  $2 \times 10^8$ -member libraries against 12ca5.**

Affinity capture:

$10^8$ -member library (10 fmol/member) was incubated with 100  $\mu$ L (1 mg; 0.13 nmol IgG binding capacity) of 12ca5-immobilized magnetic beads, in the presence of either 1 nM, 10 nM, or 100 nM HA epitope, or 100 nM, 1  $\mu$ M, or 10  $\mu$ M Gypyeidwe peptide, and 10% FBS, 1x PBS (final volume: 1 mL) on a rotating mixer for 1 h at 4 °C. Final conditions: 1 mg/mL magnetic beads; 10 pM/member library.

Elution and nanoLC-MS/MS:

Bound peptides were eluted as described in **Affinity selections of  $2 \times 10^6$ ,  $2 \times 10^7$ , and  $2 \times 10^8$ -member libraries against 12ca5.** NanoLC-MS/MS analysis was performed as described in **Characterization of  $2 \times 10^6$ ,  $2 \times 10^7$ , and  $2 \times 10^8$ -member (X)<sub>9</sub>K-CONH<sub>2</sub> libraries** and **Affinity selections of  $2 \times 10^6$ ,  $2 \times 10^7$ , and  $2 \times 10^8$ -member libraries against 12ca5.**

## Side-by-side selections against 12a5 and human polyclonal IgG<sub>1</sub>:

Preparation of 12ca5-functionalized and human IgG<sub>1</sub>-functionalized magnetic beads:

MyOne Streptavidin T1 Dynabeads (2 x 300  $\mu$ L of 10 mg/mL stock) were transferred to 1.7 mL plastic centrifuge tubes, and placed in a magnetic separation rack. Beads were washed 3 x 1 mL w/ 10% FBS, 0.02% Tween 20, 1x PBS, and then treated with 300  $\mu$ L of biotinylated 12ca5 (1.5  $\mu$ M; 0.45 nmol) or 120  $\mu$ L of biotinylated human polyclonal IgG<sub>1</sub> (3.8  $\mu$ M; 0.45 nmol; diluted to 300  $\mu$ L with 10% FBS, 0.02% Tween 20, 1x PBS). The resulting suspensions were transferred to a rotating vertical mixer and allowed to incubate for 1 h at 4°C. After this time, the beads were returned to the separating rack, the supernatant was removed, and the beads were washed 3 x 1 mL w/ 10% FBS, 0.02% Tween 20, 1x PBS. Beads were resuspended in 300  $\mu$ L of 10% FBS, 0.02% Tween 20, 1x PBS.

Affinity capture:

Library (10 fmol/member) was incubated with 100  $\mu$ L (1 mg) portions of protein-immobilized magnetic beads (prepared above) in the presence of 10% FBS, 1x PBS (final volume: 1 mL) on a rotating mixer for 1 h at 4 °C. Final conditions: 1 mg/mL magnetic beads, 10 pM/member library.

Elution and nanoLC-MS/MS:

Bound peptides were eluted as described in **Affinity selections of 2 x 10<sup>6</sup>, 2 x 10<sup>7</sup>, and 2 x 10<sup>8</sup>-member libraries against 12ca5**. NanoLC-MS/MS analysis was performed as described in **Characterization of 2 x 10<sup>6</sup>, 2 x 10<sup>7</sup>, and 2 x 10<sup>8</sup>-member (X)<sub>9</sub>K-CONH<sub>2</sub> libraries** and **Affinity selections of 2 x 10<sup>6</sup>, 2 x 10<sup>7</sup>, and 2 x 10<sup>8</sup>-member libraries against 12ca5**.

### Preparation of a $1 \times 10^9$ -member $(X)_{12}K$ -CONH<sub>2</sub> library:

Library design:  $(X)_{12}K$ -CONH<sub>2</sub>

SPPS:

4.2 g of 20  $\mu$ m TentaGel resin (0.26 mmol/g, 1.1 mmol,  $1.0 \times 10^9$  beads) was transferred to a 100 mL peptide synthesis vessel, swollen in DMF, and then washed with DMF (3x). Fmoc-Rink amide linker (2.9 g, 5.4 mmol, 5 eq) was dissolved in HATU solution (0.38 M in DMF, 12.9 mL, 4.9 mmol), activated with DIEA (2.7 mL, 16 mmol) immediately prior to coupling, and added to resin bed. Coupling was performed for 20 min; after this time, resin was washed with DMF (100 mL). Fmoc removal was carried out by treatment of resin with 20% piperidine in DMF (1 x 50 mL flow wash; 2 x 50 mL, 5 min batch treatments). Resin was then washed with DMF (150 mL). Coupling of Fmoc-Lys(Boc)-OH, subsequent Fmoc removal, and DMF washes were performed in the same manner.

At this stage, resin was suspended in DMF (50 mL), and divided evenly among 18 x 10 mL fritted plastic syringes using a 5 mL Eppendorf pipette. Couplings were performed as follows: Fmoc-protected amino acids (0.6 mmol) in HATU solution (0.38M, 1.4 mL, 0.54 mmol) were activated with DIEA (300  $\mu$ L, 1.7 mmol). Each of the amino acid derivatives listed in **Preparation of  $2 \times 10^6$ ,  $2 \times 10^7$ , and  $2 \times 10^8$ -member  $(X)_9K$ -CONH<sub>2</sub> libraries** was added to a single portion of resin (theory:  $\sim$ 260 mg resin, 60  $\mu$ mol). Couplings were performed for 20 min. Remainder of split-and-pool synthesis (twelve rounds total) was completed according to the procedure outlined in **Preparation of  $2 \times 10^6$ ,  $2 \times 10^7$ , and  $2 \times 10^8$ -member  $(X)_9K$ -CONH<sub>2</sub> libraries**.

Portioning:

Following removal of the N-terminal Fmoc group, the resin was washed with DMF (150 mL), then suspended in DMF ( $\sim$  50 mL) and divided evenly among 5 x 20 mL fritted plastic syringes. Four of these portions (theory:  $2 \times 10^8$  beads each) were washed with DCM (3x) and dried under reduced pressure. The fifth portion was further divided among 11 x 10 mL fritted plastic syringes. Ten of these portions were recombined. The recombined beads, along with the remaining portion (theory:  $1.8 \times 10^7$  beads), were washed with DCM (3x) and dried under reduced pressure. 1.0 mg of dried resin was weighed into a plastic tube (theory:  $1.4 \times 10^5$  beads) and set aside for later characterization (described in **Characterization of a  $1 \times 10^9$ -member  $(X)_{12}K$ -CONH<sub>2</sub> library**).

Cleavage from resin and solid phase extraction:

Libraries were globally deprotected and cleaved from resin as described in **Preparation of  $2 \times 10^6$ ,  $2 \times 10^7$ , and  $2 \times 10^8$ -member  $(X)_9K$ -CONH<sub>2</sub> libraries**. Crude, lyophilized powders were resuspended in 95/5 water/acetonitrile (0.1% TFA), and purified over Supelclean™ LC-18 SPE cartridges (2 g bed mass, 45  $\mu$ m particle size, 12

mL; Millipore Sigma, P/N 57117). Procedure is described in **Preparation of 2 x 10<sup>6</sup>, 2 x 10<sup>7</sup>, and 2 x 10<sup>8</sup>-member (X)<sub>9</sub>K-CONH<sub>2</sub> libraries.**

Preparation of stock solutions:

Lyophilized powders of 2 x 10<sup>8</sup>-member libraries were each dissolved first in DMF and then diluted with 1x PBS to a final library concentration of 8 mM (~40 pM/member), and a final DMF concentration of 10% (v/v). Lyophilized powder of 2 x 10<sup>7</sup>-member library was similarly first dissolved in DMF, and then diluted with 1x PBS to a final library concentration of 7 mM (~400 pM/member), and a final DMF concentration of 10% (v/v). Stock solutions were aliquotted out and stored at -80 °C. Aliquots were thawed on ice prior to use.

### **Characterization of a $1 \times 10^9$ -member (X)<sub>12</sub>K-CONH<sub>2</sub> library:**

#### Sample preparation:

A 1.0 mg aliquot of library resin (from **Preparation of a  $1 \times 10^9$ -member (X)<sub>12</sub>K-CONH<sub>2</sub> library**) was suspended in 1.0 mL of Milli-Q water and sonicated to achieve a homogenous suspension (theory:  $1.4 \times 10^5$  beads/mL). A 4  $\mu$ L aliquot (theory: 559 beads; 1 pmol/peptide) was transferred to a plastic tube, spun down, and supernatant removed. Beads were then subjected to treatment with 94% (v/v) TFA, 2.5% (v/v) ethanedithiol, 2.5% (v/v) water, and 1.0% (v/v) triisopropylsilane, for 10 min in a 60 °C water bath. TFA was then evaporated under a stream of nitrogen, and cleaved peptide was resuspended in Milli-Q water (0.1% TFA). Sample was purified over a C18 ZipTip<sup>®</sup> (0.6  $\mu$ L, MilliporeSigma, P/N ZTC18S096), eluted in 30/70 water/acetonitrile (0.1% TFA), and lyophilized. Powder was resuspended in 34  $\mu$ L of Milli-Q water (0.1% FA), and 1  $\mu$ L (~30 fmol/peptide) was submitted for nLC-MS/MS analysis.

#### NanoLC-MS/MS analysis and *de novo* peptide sequencing:

Analysis and *de novo* sequencing was performed as described in **Characterization of  $2 \times 10^6$ ,  $2 \times 10^7$ , and  $2 \times 10^8$ -member (X)<sub>9</sub>K-CONH<sub>2</sub> libraries.**

### **Preparation of synthetic (25-109)MDM2 K36(biotin):**

The N-terminal domain of MDM2 (residues 25-109; sequence shown in **Supplementary Fig. 28**) was synthesized on a 0.03 mmol scale on H-Rink amide-ChemMatrix resin (0.18 mmol/g) via automated fast flow synthesis<sup>4</sup>.

A biotin was site-specifically incorporated as follows: Fmoc-L-Lys(alloc)-OH was used for coupling of Lys36 during SPPS. Following main chain elaboration, the N-terminal amino group was Boc-protected by first washing the resin 3 times with DCM, then adding to the resin a solution of di-tert-butyl dicarbonate (40 eq, 400 mM) and DIEA (40 eq) in DCM. Coupling was allowed to proceed for 30 min. At this time, resin was washed 5 times with DCM and coupling was repeated as described. To remove the Alloc group on Lys36, resin was treated with a solution of tetrakis(triphenylphosphine)palladium(0) (2 eq, 20 mM) and phenylsilane (80 eq) in DCM. After 30 min, reaction mixture was drained and deprotection was repeated as described. At this time, resin was washed 5 times with DCM, then 5 times with DMF. To a solution of biotin-(PEG)<sub>4</sub>-propionic acid (15 eq, 0.42 M) and HATU (13.5 eq, 0.38 M) in DMF was added DIEA (45 eq), and solution was then added to the resin bed and allowed to react for 3 h. At this time, resin was washed 5 times with DMF, 5 times with DCM, and dried under reduced pressure.

LC-MS characterization of HPLC-purified (25-109)MDM2 K36(biotin) was performed as described in **Solid phase peptide synthesis (SPPS) of anti-hemagglutinin (HA) epitope and analogues**.



## **Affinity selections against MDM2—multi-pot selections of five ( $2 \times 10^8$ )-member libraries:**

Procedure for each selection (five in total), conducted side by side against 12ca5 as a control, is outlined below:

Preparation of MDM2-functionalized and 12ca5-functionalized magnetic beads:

MyOne Streptavidin T1 Dynabeads ( $2 \times 300 \mu\text{L}$  of  $10 \text{ mg/mL}$  stock) were transferred to  $1.7 \text{ mL}$  plastic centrifuge tubes, and placed in a magnetic separation rack. Beads were washed  $3 \times 1 \text{ mL}$  w/  $10\%$  FBS,  $0.02\%$  Tween 20,  $1 \times \text{PBS}$ , and then treated with  $115 \mu\text{L}$  of refolded, biotinylated (25-109)MDM2 ( $10.8 \mu\text{M}$ ;  $1.2 \text{ nmol}$ ; diluted to  $300 \mu\text{L}$  with  $10\%$  FBS,  $0.02\%$  Tween 20,  $1 \times \text{PBS}$ ) or  $300 \mu\text{L}$  of biotinylated 12ca5 ( $1.5 \mu\text{M}$ ;  $0.45 \text{ nmol}$ ). The resulting suspensions were transferred to a rotating vertical mixer and allowed to incubate for  $1 \text{ h}$  at  $4^\circ\text{C}$ . After this time, the beads were returned to the separating rack, the supernatant was removed, and the beads were washed  $3 \times 1 \text{ mL}$  w/  $10\%$  FBS,  $0.02\%$  Tween 20,  $1 \times \text{PBS}$ . Beads were resuspended in  $300 \mu\text{L}$  of  $10\%$  FBS,  $0.02\%$  Tween 20,  $1 \times \text{PBS}$ .

Affinity capture:

Library ( $10 \text{ fmol/member}$ ) was incubated with  $100 \mu\text{L}$  ( $1 \text{ mg}$ ) portions of protein-immobilized magnetic beads (prepared above) in the presence of  $10\%$  FBS,  $1 \times \text{PBS}$  (final volume:  $1 \text{ mL}$ ) on a rotating mixer for  $1 \text{ h}$  at  $4^\circ\text{C}$ . Final conditions:  $1 \text{ mg/mL}$  magnetic beads,  $10 \text{ pM/member}$  library.

Elution and nanoLC-MS/MS:

Bound peptides were eluted as described in **Affinity selections of  $2 \times 10^6$ ,  $2 \times 10^7$ , and  $2 \times 10^8$ -member libraries against 12ca5**. NanoLC-MS/MS analysis was performed as described in **Characterization of  $2 \times 10^6$ ,  $2 \times 10^7$ , and  $2 \times 10^8$ -member (X)<sub>9</sub>K-CONH<sub>2</sub> libraries** and **Affinity selections of  $2 \times 10^6$ ,  $2 \times 10^7$ , and  $2 \times 10^8$ -member libraries against 12ca5**.

**Affinity selections against MDM2—one-pot selections of  $2 \times 10^7$  and  $1 \times 10^9$ -member libraries:**

Preparation of MDM2-functionalized and 12ca5-functionalized magnetic beads:

Magnetic beads were prepared as described in **Affinity selections against MDM2—multi-pot selections of five ( $2 \times 10^8$ )-member libraries.**

Affinity capture:

*For  $2 \times 10^7$ -member library:*

Library (10 fmol/member) was incubated with 100  $\mu$ L (1 mg) portions of protein-immobilized magnetic beads in the presence of 10% FBS, 1x PBS (final volume: 1 mL) on a rotating mixer for 1 h at 4 °C. Final conditions: 1 mg/mL magnetic beads, 10 pM/member library.

*For  $1 \times 10^9$ -member library:*

Library (10 fmol/member) was incubated with 100  $\mu$ L (1 mg) portions of protein-immobilized magnetic beads in the presence of 10% FBS, 1x PBS (final volume: 1.5 mL) on a rotating mixer for 1 h at 4 °C. Final conditions: 0.7 mg/mL magnetic beads, 7 pM/member library.

Elution and nanoLC-MS/MS:

Bound peptides were eluted as described in **Affinity selections of  $2 \times 10^6$ ,  $2 \times 10^7$ , and  $2 \times 10^8$ -member libraries against 12ca5.** NanoLC-MS/MS analysis was performed as described in **Characterization of  $2 \times 10^6$ ,  $2 \times 10^7$ , and  $2 \times 10^8$ -member (X)<sub>9</sub>K-CONH<sub>2</sub> libraries** and **Affinity selections of  $2 \times 10^6$ ,  $2 \times 10^7$ , and  $2 \times 10^8$ -member libraries against 12ca5.**

### **Expression of 14-3-3 $\gamma$ :**

Full-length human 14-3-3 $\gamma$  was expressed by transforming pROEX HTb plasmid, containing a His6-tagged 14-3-3 $\gamma$ FL gene and ampicillin resistance gene, to Rosetta(DE3) Escherichia coli cells (Novagen). Cells were grown at 37 °C, with 0.1 mg/mL ampicillin, and protein expression was induced using 0.4  $\mu$ M IPTG and 1 mM MgCl<sub>2</sub> and left overnight at 18 °C. Cells were harvested and resuspended in 200 mL of wash buffer (50 mM Tris, 300 mM NaCl, 12.5 mM imidazole, 2 mM  $\beta$ -mercaptoethanol (BME), pH = 8.0). The proteins were isolated by homogenizing the cell pellets at a pressure of 40 psi using Emulsiflex-C3 homogenizer. The homogenized mixture was centrifuged at 40,000 x g for 30 min at 4 °C and the supernatant was loaded onto a nickel-nitrilotriacetic acid affinity column (Qiagen) pre-equilibrated with wash buffer. After washing the column with wash buffer containing 12.5 mM imidazole, the bound protein was eluted with 250 mM imidazole. Fractions containing protein were verified using SDS-PAGE (sodium dodecyl sulfate polyacrylamide gel electrophoresis). The protein containing fractions was dialyzed into dialysis buffer (50 mM Tris pH 8, 300 mM NaCl and 2 mM BME) and in a next step to ITC buffer (25 mM HEPES pH 7.5, 100 mM NaCl, 10 mM MgCl<sub>2</sub> and 0.5 mM TCEP). The protein was concentrated (measured using Nanodrop-1000), aliquotted and stored at -80 °C.

Purity and exact mass of the 14-3-3 $\gamma$  protein was determined using a High Resolution LC-MS system consisting of a Waters ACQUITY UPLC I-Class system coupled to a Xevo G2 Quadrupole Time of Flight (Q-ToF). The system was comprised of a Binary Solvent Manager and a Sample Manager with Fixed-Loop (SM-FL). The protein was separated (0.3 mL/min) by the column (Polaris C18A reverse phase column 2.0 x 100 mm, Agilent) using a 15% to 75% acetonitrile gradient in water (0.1% v/v formic acid) before analysis in positive mode in the mass spectrometer. Deconvolution was performed using the MaxENTI algorithm in the Masslynx v4.1 (SCN862) software.

**Biotinylation of 14-3-3 $\gamma$ :**

To 900  $\mu\text{L}$  of a 0.35 mM solution of 14-3-3 $\gamma$  (10 mg, 0.32  $\mu\text{mol}$ ) in reaction buffer (25 mM HEPES, 100 mM NaCl, 10 mM MgCl<sub>2</sub>, 0.5 mM TCEP, pH = 7.5) was added 100  $\mu\text{L}$  of a 6.3  $\mu\text{M}$  solution (in DMF) of NHS-PEG4-biotin (2 eq, 0.63  $\mu\text{mol}$ ). Reaction was allowed to proceed for 1 h at ambient temperature. At this time, reaction was quenched with the addition of 5 mL of quenching buffer (25 mM Tris, 100 mM NaCl, 10 mM MgCl<sub>2</sub>, 0.5 mM TCEP, pH = 7.5). Sample was then spin washed 5x (10k MW cutoff, 15 mL spin filter), from quenching buffer back into reaction buffer, to remove excess biotin reagent. Protein concentration, measured by absorbance at 280 nm ( $\epsilon = 37,945 \text{ M}^{-1}\text{cm}^{-1}$ ), was determined to be 85  $\mu\text{M}$ . Protein was aliquotted and stored at -80 °C.

## Preparation of a non-canonical (X)<sub>4</sub>(pS)(X)<sub>4</sub>-CONH<sub>2</sub> library:

Library design: (X)<sub>4</sub>(pS)(X)<sub>4</sub>K-CONH<sub>2</sub>

SPPS:

2.9 g of 30 μm TentaGel resin (0.26 mmol/g, 0.74 mmol, 2.0 x 10<sup>8</sup> beads) was transferred to a 100 mL peptide synthesis vessel, swollen in DMF, and then washed with DMF (3x). Fmoc-Rink amide linker (2.0 g, 3.7 mmol, 5 eq) was dissolved in HATU solution (0.38 M in DMF, 8.8 mL, 3.3 mmol), activated with DIEA (1.9 mL, 11 mmol) immediately prior to coupling, and added to resin bed. Coupling was performed for 20 min; after this time, resin was washed with DMF (100 mL). Fmoc removal was carried out by treatment of resin with 20% piperidine in DMF (1 x 50 mL flow wash; 2 x 50 mL, 5 min batch treatments). Resin was then washed with DMF (150 mL). Coupling of Fmoc-Lys(Boc)-OH, subsequent Fmoc removal, and DMF washes were performed in the same manner.

At this stage, resin was suspended in DMF (50 mL), and divided evenly among 18 x 10 mL fritted plastic syringes using a 5 mL Eppendorf pipette. Couplings were performed as follows: Fmoc-protected amino acids (0.29 mmol) in HATU solution (0.38M, 683 μL, 0.26 mmol) were activated with DIEA (150 μL, 0.86 mmol). Each of the following amino acid derivatives was added to a single portion of resin (theory: ~190 mg resin, 40 μmol): Fmoc-D-Leu-OH, Fmoc-D-Lys(Boc)-OH, Fmoc-D-Asp(OtBu)-OH, Fmoc-D-Gln(Trt)-OH, Fmoc-β-Ala-OH, Fmoc-L-β-HomoSer(tBu)-OH, Fmoc-β-HomoThr(tBu)-OH, Fmoc-Ala(β-cyclopropyl)-OH, Fmoc-L-Cha-OH, Fmoc-Nva-OH, Fmoc-L-Aad(OtBu)-OH, Fmoc-Dab(Boc)-OH, Fmoc-L-Orn(Boc)-OH, Fmoc-Hyp(tBu)-OH, Fmoc-L-Ala(4-thiazoyl)-OH, Fmoc-L-Phe(4-NHBoc)-OH, Fmoc-Phe(4-F)-OH, and Fmoc-Phe(4-NO<sub>2</sub>)-OH. Couplings were performed for 20 min. Following four cycles of split-and-pool synthesis, Fmoc-Ser(PO(OBzl)OH)-OH (1.9 g, 3.7 mmol, 5 eq) was dissolved in HATU solution (0.38 M in DMF, 8.8 mL, 3.3 mmol), activated with DIEA (1.9 mL, 11 mmol) immediately prior to coupling, and added to resin bed. Coupling was performed for 2.5 h; after this time, resin was washed with DMF (100 mL). Fmoc removal was carried out by treatment of resin with 20% piperidine in DMF (1 x 50 mL flow wash; 2 x 50 mL, 5 min batch treatments). Resin was then washed with DMF (150 mL). Four more cycles of split-and-pool synthesis were then performed as described above.

Following removal of N-terminal Fmoc group, resin was washed with DMF (150 mL) and transferred to fritted plastic syringes (20 mL). Resin was then washed with DCM (3x) and dried under reduced pressure. 1.0 mg of dried resin (theory: 4.8 x 10<sup>4</sup> beads) was weighed into a plastic tube and set aside for later characterization (**Characterization of a non-canonical (X)<sub>4</sub>(pS)(X)<sub>4</sub>-CONH<sub>2</sub> library**).

Cleavage from resin and solid phase extraction:

Libraries were globally deprotected and cleaved from resin as described in **Preparation of 2 x 10<sup>6</sup>, 2 x 10<sup>7</sup>, and 2 x 10<sup>8</sup>-member (X)<sub>9</sub>K-CONH<sub>2</sub> libraries**. Crude, lyophilized powders were resuspended in 95/5 water/acetonitrile (0.1% TFA), and

purified over Supelclean™ LC-18 SPE cartridges (2 g bed mass, 45 µm particle size, 12 mL; Millipore Sigma, P/N 57117). Procedure is described in **Preparation of 2 x 10<sup>6</sup>, 2 x 10<sup>7</sup>, and 2 x 10<sup>8</sup>-member (X)<sub>9</sub>K-CONH<sub>2</sub> libraries.**

Preparation of stock solution:

Lyophilized powder of library (123 mg) was dissolved in DMF (1.16 mL) and diluted with 1x PBS (10.5 mL) to a final library concentration of 8 mM (~40 pM/member) and final DMF concentration of 10% (v/v). Stock solutions were aliquotted out and stored at -80 °C. Aliquots were thawed on ice prior to use.

## Characterization of a non-canonical (X)<sub>4</sub>(pS)(X)<sub>4</sub>-CONH<sub>2</sub> library:

### Sample preparation:

A 1.0 mg aliquot of library resin (from **Preparation of a non-canonical (X)<sub>4</sub>(pS)(X)<sub>4</sub>-CONH<sub>2</sub> library**) was suspended in 1.0 mL of Milli-Q water and sonicated to achieve a homogenous suspension (theory:  $4.8 \times 10^4$  beads/mL). A 10  $\mu$ L aliquot (theory: 475 beads; 1 pmol/peptide) was transferred to a plastic tube, spun down, and supernatant removed. Beads were then subjected to treatment with 94% (v/v) TFA, 2.5% (v/v) ethanedithiol, 2.5% (v/v) water, and 1.0% (v/v) triisopropylsilane, for 10 min in a 60 °C water bath. TFA was then evaporated under a stream of nitrogen, and cleaved peptide was resuspended in Milli-Q water (0.1% TFA). Sample was purified over a C18 ZipTip<sup>®</sup> (0.6  $\mu$ L, MilliporeSigma, P/N ZTC18S096), eluted in 30/70 water/acetonitrile (0.1% TFA), and lyophilized. Powder was resuspended in 90  $\mu$ L of Milli-Q water (0.1% FA), and 1  $\mu$ L (~40 fmol/peptide) was submitted for nLC-MS/MS analysis.

### NanoLC-MS/MS analysis and *de novo* peptide sequencing:

Analysis and *de novo* sequencing was performed as described in **Characterization of  $2 \times 10^6$ ,  $2 \times 10^7$ , and  $2 \times 10^8$ -member (X)<sub>9</sub>K-CONH<sub>2</sub> libraries**. Non-canonical amino acids with masses that differ from natural amino acids were sequenced as fixed modifications on residues that had been excluded from the monomer set. Specifically,  $\beta$ -homothreonine was identified as fixed modification on Asn (+1.0204), aminoadipic acid as a fixed modification on Glu (+14.0156), diaminobutyric acid as a fixed modification on Gly (+43.0421), ornithine as a fixed modification on Cys (+11.0701), hydroxyproline as a fixed modification on Pro (+15.9948), cyclopropyl alanine as a fixed modification on Met (-19.9721), cyclohexyl alanine as a fixed modification on Phe (+6.0469), 4-amino phenylalanine as a fixed modification on Arg (+5.9782), 4-fluoro phenylalanine as a fixed modification on Tyr (+1.9957), 4-nitro phenylalanine as a fixed modification on Trp (+5.9742), thiazolyl alanine as a fixed modification on His (+16.9611), and phosphoserine as a fixed modification on Ser (+79.9663).  $\beta$ -alanine,  $\beta$ -homoserine, and norvaline were identified as Ala, Thr, and Val, respectively. D-Leu, D-Lys, D-Asp, and D-Gln were identified as Leu, Lys, Asp, and Gln, respectively.

### Affinity selections against 14-3-3 $\gamma$ :

Preparation of 14-3-3 $\gamma$ -functionalized and 12ca5-functionalized magnetic beads:

MyOne Streptavidin T1 Dynabeads (2 x 300  $\mu$ L of 10 mg/mL stock) were transferred to 1.7 mL plastic centrifuge tubes, and placed in a magnetic separation rack. Beads were washed 3 x 1 mL w/ blocking buffer (10% FBS, 100  $\mu$ M tri-tryptophan additive, 1x PBS), and then treated with 9  $\mu$ L of biotinylated 14-3-3 $\gamma$  (85  $\mu$ M; 0.79 nmol; diluted to 300  $\mu$ L with blocking buffer) or 300  $\mu$ L of biotinylated 12ca5 (1.5  $\mu$ M; 0.45 nmol). The resulting suspensions were transferred to a rotating vertical mixer and allowed to incubate for 1 h at 4°C. After this time, the beads were returned to the separating rack, the supernatant was removed, and the beads were washed 3 x 1 mL w/ blocking buffer. Beads were then resuspended in 300  $\mu$ L of blocking buffer.

Affinity capture:

Library (10 fmol/member) was incubated with 100  $\mu$ L (1 mg) portions of protein-immobilized magnetic beads (prepared above) in the presence of blocking buffer (final volume: 1 mL) on a rotating mixer for 1 h at 4 °C. Final conditions: 1 mg/mL magnetic beads, 10 pM/member library.

Elution and nanoLC-MS/MS:

Bound peptides were eluted as described in **Affinity selections of 2 x 10<sup>6</sup>, 2 x 10<sup>7</sup>, and 2 x 10<sup>8</sup>-member libraries against 12ca5**. NanoLC-MS/MS analysis was performed as described in **Characterization of 2 x 10<sup>6</sup>, 2 x 10<sup>7</sup>, and 2 x 10<sup>8</sup>-member (X)<sub>9</sub>K-CONH<sub>2</sub> libraries and Affinity selections of 2 x 10<sup>6</sup>, 2 x 10<sup>7</sup>, and 2 x 10<sup>8</sup>-member libraries against 12ca5**.



## SPPS of FITC-labeled putative 14-3-3 $\gamma$ -binding peptides:

Preparation of Lys(boc)- $\beta$ -Ala-Lys(alloc)-Rink amide peptidyl resin:

Rink amide ChemMatrix resin (1.0 g, 0.45 mmol/g) was transferred to a 20 mL plastic fritted syringe, washed 3 x 20 mL with DMF, and swollen in 20 mL of DMF for 1 h. Fmoc-L-Lys(alloc)-OH (2.25 mmol, 5 eq, 1.0 g) was weighed into a glass vial and dissolved in 0.38 M HATU in DMF (5.34 mL, 2.0 mmol, 0.9 eq HATU). To this solution was added DIEA (1.13 mL, 6.5 mmol, 2.9 eq), and activated amino acid solution was added to the resin bed. Coupling was allowed to proceed for 1 h. At this time, the reaction mixture was drained and the resin was washed 3 x 20 mL with DMF. Fmoc removal was carried out by treatment of the resin with 20% piperidine in DMF (2 x 20 mL, 5 min batch treatments). Resin was then washed 3 x 20 mL with DMF. Couplings of Fmoc- $\beta$ -Ala-OH and Fmoc-Lys(boc)-OH were performed in the same manner. After removal of the N-terminal Fmoc group, the resin was suspended in DMF (~20 mL) and split out 10 ways into 6 mL plastic fritted syringes. (Note:  $\beta$ -Ala was incorporated as a spacer between the sequences obtained from selection, which all bear a C-terminal lysine, and Lys(alloc), to which a FITC fluorophore will be coupled for fluorescence anisotropy studies.)

Main chain elaboration of select sequences derived from affinity selection:

One portion of peptidyl resin prepared above was used for every construct prepared (four in total). Couplings were performed as follows: Fmoc-protected amino acids (0.23 mmol) in HATU solution (0.38M, 534  $\mu$ L, 0.2 mmol) were activated with DIEA (113  $\mu$ L, 0.65 mmol) and added to the resin bed. Couplings were allowed to proceed for 20 min. At this time, reaction mixtures were drained and resins were washed 3 x 5 mL with DMF. Fmoc removal was carried out by treatment of the resin with 20% piperidine in DMF (1 x 5 mL flow wash; 2 x 5 mL, 5 min batch treatments). Following removal of N-terminal Fmoc group, resins were washed 3 x 5 mL with DMF, then 3 x 5 mL with DCM.

Incorporation of FITC:

The free amine on the N-terminus was Boc-protected as follows: to a solution of di-tert-butyl dicarbonate (0.45 mmol, 10 eq, 400 mM) in DCM was added DIEA (10 eq), and solution was added to each portion of resin. Coupling was allowed to proceed for 1 h. At this time, resin was washed 3 x 5 mL with DCM and coupling was repeated as described. Resin was washed 5 x 5 mL with DCM.

Alloc removal was achieved as follows: each portion of resin was treated with a solution of tetrakis(triphenylphosphine)palladium(0) (0.5 eq, 20 mM) and phenylsilane (20 eq) in DCM, 2 x 45 min. Resins were then washed 3 x 5 mL with DCM, then 3 x 5 mL with DMF.

FITC was installed on the free amine on each C-terminal lysine by treating each portion of resin with fluorescein isothiocyanate isomer I (10 eq, 400 mM in 4:1 DMF:DCM) and DIEA (15 eq) for 1.5 h. Reactions were kept under aluminum foil for

the duration of the coupling. Reaction mixtures were then drained, and resins were washed 3 x 5 mL with DMF, 3 x 5 mL with DCM, and dried under reduced pressure.

Cleavage from resin, HPLC purification, and LC-MS characterization:

Detailed procedures can be found in **Solid phase peptide synthesis (SPPS) of anti-hemagglutinin (HA) epitope and analogues**. Sequences, structures, and LC-MS traces are shown below.

### **Fluorescence anisotropy binding assay of 14-3-3 $\gamma$ -binding peptides:**

All fluorescence anisotropy affinity measurements were conducted in FA buffer (10 mM HEPES pH 7.4, 150 mM NaCl, 0.1% (v/v) Tween 20, 0.1% (w/v) BSA). During each assay a 1:1 dilution series (starting at 100  $\mu$ M) of 14-3-3 $\gamma$  was made in wells containing a fixed concentration FITC-labeled peptide (10 nM or 50 nM). This was done in polystyrene non-binding low-volume Corning Black Round Bottom 384-well plates (Corning 4514). Measurements were performed at ambient temperature using a Tecan Infinite F500 plate reader with the following parameters:  $\lambda_{\text{ex}}$ : 485 (20) nm;  $\lambda_{\text{em}}$ : 535 (25) nm; mirror: Dichroic 510; flashes: 20; integration time: 50  $\mu$ s; settle time; 0  $\mu$ s; gain: manual 90; Z-position: calculated from well. The G-factor was set at 35 mP based on wells containing only the FITC-labeled peptide.

### **SPPS of unlabeled 14-3-3 $\gamma$ -binding peptides:**

SPPS was carried out on Rink amide ChemMatrix resin (0.45 mmol/g). Couplings for main chain elaboration were carried out as described in **SPPS of FITC-labeled putative 14-3-3 $\gamma$ -binding peptides**. Cleavage from resin, HPLC purification, and LC-MS characterization were performed as described in **Solid phase peptide synthesis (SPPS) of anti-hemagglutinin (HA) epitope and analogues**. Sequences, structures, and LC-MS traces are shown below.

### **Competition fluorescence anisotropy binding assay of 14-3-3 $\gamma$ -binding peptides:**

All fluorescence anisotropy affinity measurements were conducted in FA buffer (10 mM HEPES pH 7.4, 150 mM NaCl, 0.1% (v/v) Tween-20, 0.1% (w/v) BSA). During each assay a 1:1 dilution series (starting at 10  $\mu$ M) of unlabeled peptides were made in wells containing a fixed concentration FITC-labeled biExoS (10 nM; FITC-O1Pen-QGLLDALDLAS(GGSGGGGSGG)QGLLDALDLAS-CONH<sub>2</sub>)<sup>5</sup>, and 14-3-3 $\gamma$  (20 nM). This is done in polystyrene non-binding low-volume Corning Black Round Bottom 384-well plates (Corning 4514). Measurements were performed at ambient temperature using a Tecan Infinite F500 plate reader with the following parameters:  $\lambda_{\text{ex}}$  = 485 (20) nm;  $\lambda_{\text{em}}$  = 535 (25) nm, mirror: Dichroic = 510, flashes: 20; integration time: 50  $\mu$ s; settle time: 0  $\mu$ s; gain: manual 90; and Z-position: calculated from well. The G-factor was set at 35 mP based on wells containing only the FITC-labeled peptide.

### **Expression of 14-3-3 $\sigma\Delta$ c:**

The 14-3-3 $\sigma$  isoform with a truncated C-terminus after T321 ( $\Delta$ C, to enhance crystallization) was expressed by transforming pROEX HTb plasmid, containing a His6-tagged 14-3-3 $\sigma\Delta$ c gene and ampicillin resistance gene, to BL21(DE3) Escherichia coli cells (Novagen). Cells were grown at 37 °C, with 0.1 mg/mL ampicillin, and protein expression was induced using 0.4  $\mu$ M IPTG and 1 mM MgCl<sub>2</sub> and left overnight at 18 °C. Cells were harvested and resuspended in 200 mL of wash buffer (50 mM Tris, 300 mM NaCl, 12.5 mM imidazole, 2 mM  $\beta$ -mercaptoethanol (BME), pH = 8.0). The proteins were isolated by homogenizing the cell pellets at a pressure of 40 psi using Emulsiflex-C3 homogenizer. The homogenized mixture was centrifuged at 40,000 x g for 30 min at 4 °C and the supernatant was loaded onto a nickel-nitrilotriacetic acid affinity column (Qiagen) pre-equilibrated with wash buffer. After washing the column with wash buffer containing 12.5 mM imidazole, the bound protein was eluted with 250 mM imidazole. Fractions containing protein were verified using SDS-PAGE (sodium dodecyl sulfate polyacrylamide gel electrophoresis). The protein containing fractions were dialyzed overnight in dialysis buffer (50 mM Tris pH 8, 300 mM NaCl and 2 mM BME) containing TEV protease for His-tag cleavage at 4°C. Non-cleaved His-tagged 14-3-3 $\sigma\Delta$ c was then captured using a nickel-nitrilotriacetic acid affinity column (Qiagen) pre-equilibrated with wash buffer after which the flow through was dialyzed into ITC buffer (25 mM HEPES pH 7.5, 100 mM NaCl, 10 mM MgCl<sub>2</sub> and 0.5 mM TCEP) at 4°C. The protein was concentrated (measured using Nanodrop-1000), aliquotted and stored at -80 °C. Purity and exact mass of the 14-3-3 $\sigma\Delta$ c protein was determined as described in **Expression of 14-3-3 $\gamma$ .**

**Binding validation of 14-3-3.12 and 14-3-3 $\Delta$ c:**

Fluorescence anisotropy measurements were carried according to the general protocol described in **Fluorescence anisotropy binding assay of 14-3-3 $\gamma$ -binding peptides.**

### **Single crystal X-Ray diffraction analysis of 14-3-3 $\sigma$ $\Delta$ c in complex with synthetic peptide binder 14-3-3.12:**

Unlabeled **14-3-3.12** was soaked into preformed crystals of 14-3-3 $\sigma$  $\Delta$ c, which grew in 25% PEG400, 5% Glycerol, 0.2 M CaCl<sub>2</sub>, 0.1 M HEPES pH 7.5 plus 2 mM BME within two weeks. The soaked crystal was fished after 15 days of incubation and flash-frozen in liquid nitrogen. Diffraction data was collected at 100K on an in-house Rigaku Micromax-003 (Rigaku Europe, Kemsing Sevenoaks, UK) sealed tube X-ray source and Dectris Pilatus 200K detector (DECTRIS Ltd Baden-Daettwil, Switzerland).

Integration, scaling and merging of data was done using DIALS (CCP4i2) after which molecular replacement is done with MOLREP (CCP4i2) using PDB 4JC3 as search model. A three-dimensional structure of **14-3-3.12** was generated using eLBOW (Phenix)<sup>6</sup> after which it was built within this structure based on visual inspection of Fo-Fc and 2FoFc electron density maps in Coot<sup>7</sup>. Several rounds of model building and refinement (based on isotropic b-factors and standard set of stereo-chemical restraints: covalent bonds, angles, dihedrals, planarities, chiralities, non-bonded) were performed using Coot and Phenix.refine<sup>8,9</sup>. See **Supplementary Table 12** for data collection and refinement statistics.



## Supplementary Figures

Amino acid sequence: YPYDVPDYA<sup>α</sup>-CONH<sub>2</sub>

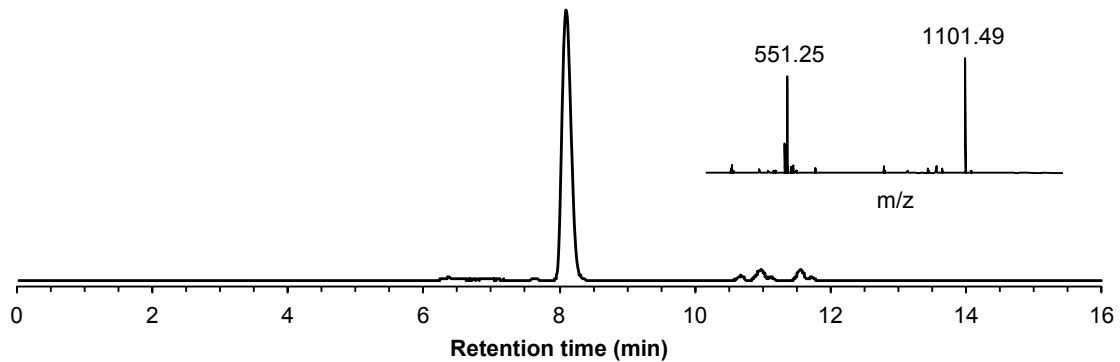

**Supplementary Figure 1.** LC-MS characterization of the native HA epitope (monoisotopic mass: 1100.47 Da; found: 1100.48 Da).

Amino acid sequence: FDYEDYAEWK<sup>α</sup>-CONH<sub>2</sub>

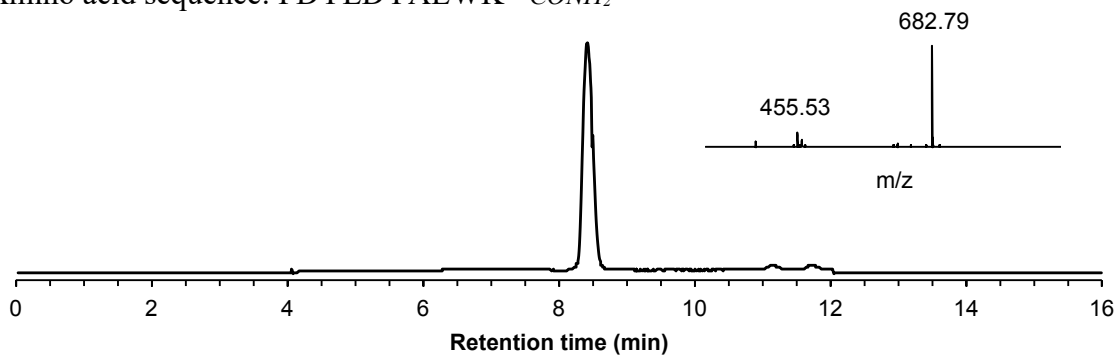

**Supplementary Figure 2.** LC-MS characterization of a 12ca5-binding peptide identified from early affinity selection experiments (monoisotopic mass: 1363.56 Da; found: 1363.57 Da).

Amino acid sequence: YPYDVPDYG<sup>α</sup>-CONH<sub>2</sub>

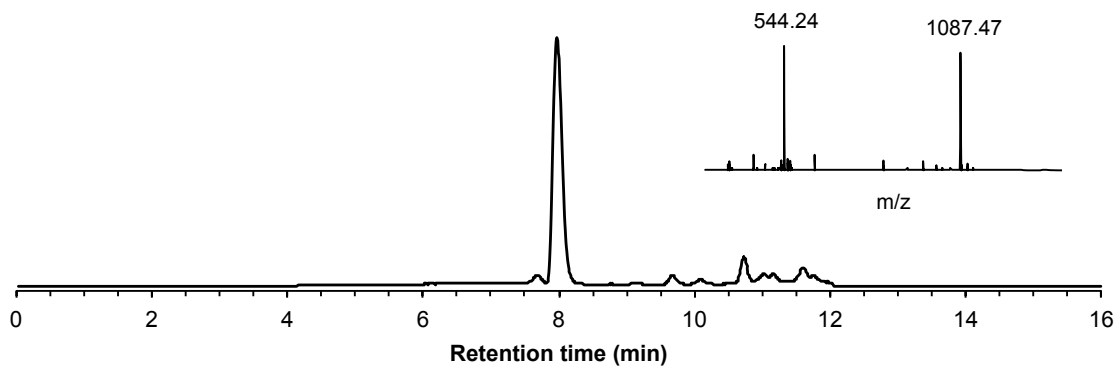

**Supplementary Figure 3.** LC-MS characterization of HA epitope mutant Ala9Gly (monoisotopic mass: 1086.46 Da; found: 1087.47 Da).

Amino acid sequence: Gypyeydwe<sup>α</sup>-CONH<sub>2</sub>

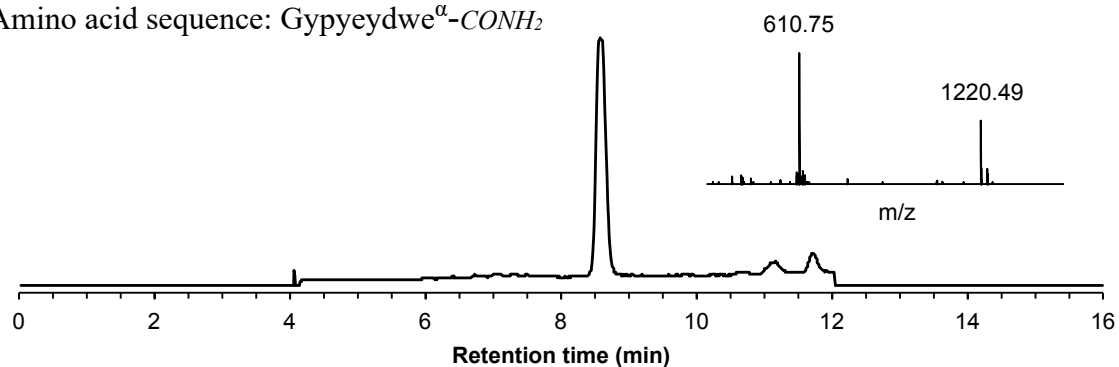

**Supplementary Figure 4.** LC-MS characterization of a 12ca5-binding peptide, comprised of D-amino acids, derived from the loop of a 12ca5-binding xenoprotein (monoisotopic mass: 1219.47 Da; found: 1219.48 Da).

Amino acid sequence: ypyefdeph<sup>α</sup>-CONH<sub>2</sub>

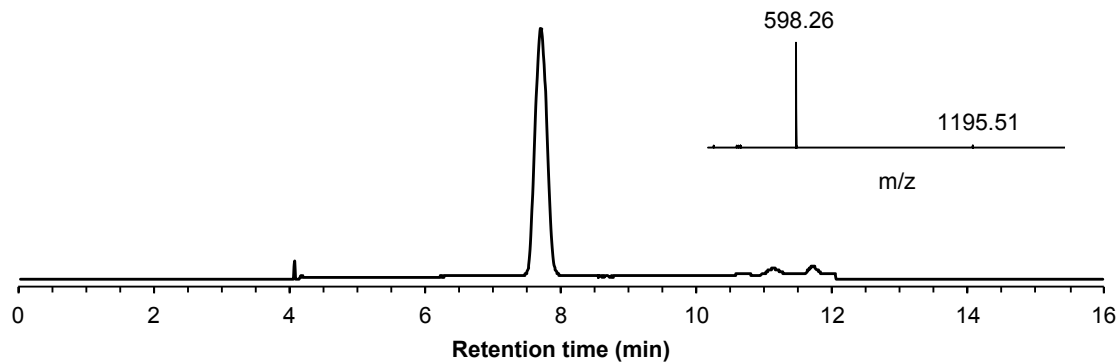

**Supplementary Figure 5.** LC-MS characterization of a 12ca5-binding peptide, comprised of D-amino acids, derived from the loop of a 12ca5-binding xenoprotein (monoisotopic mass: 1194.49 Da; found: 1194.50 Da).

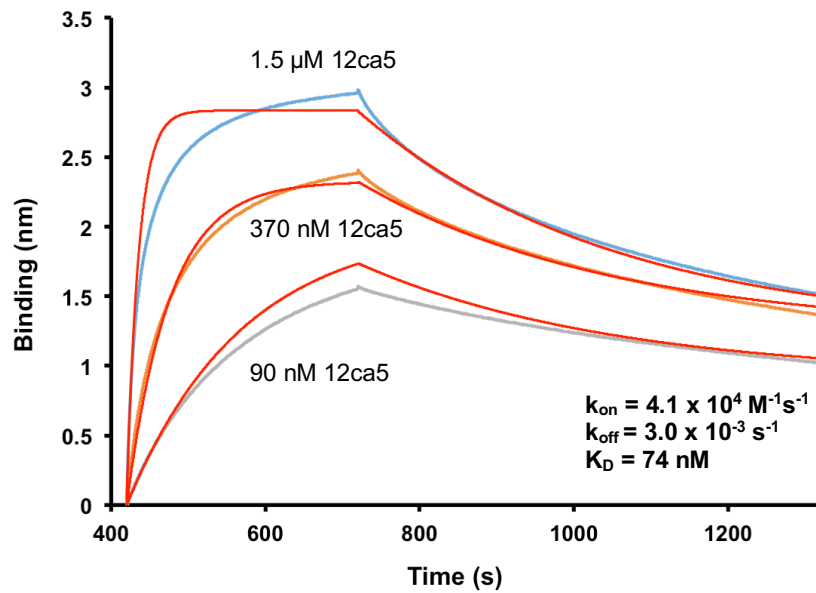

**Supplementary Figure 6.** 12ca5 ligand 'FDYEDYAEWKK(biotin)' binds to 12ca5 with a  $k_{on}$  of  $4.1 \times 10^4 \text{ M}^{-1}\text{s}^{-1}$  and a  $k_{off}$  of  $3.0 \times 10^{-3} \text{ s}^{-1}$ , as measured by BioLayer Interferometry.

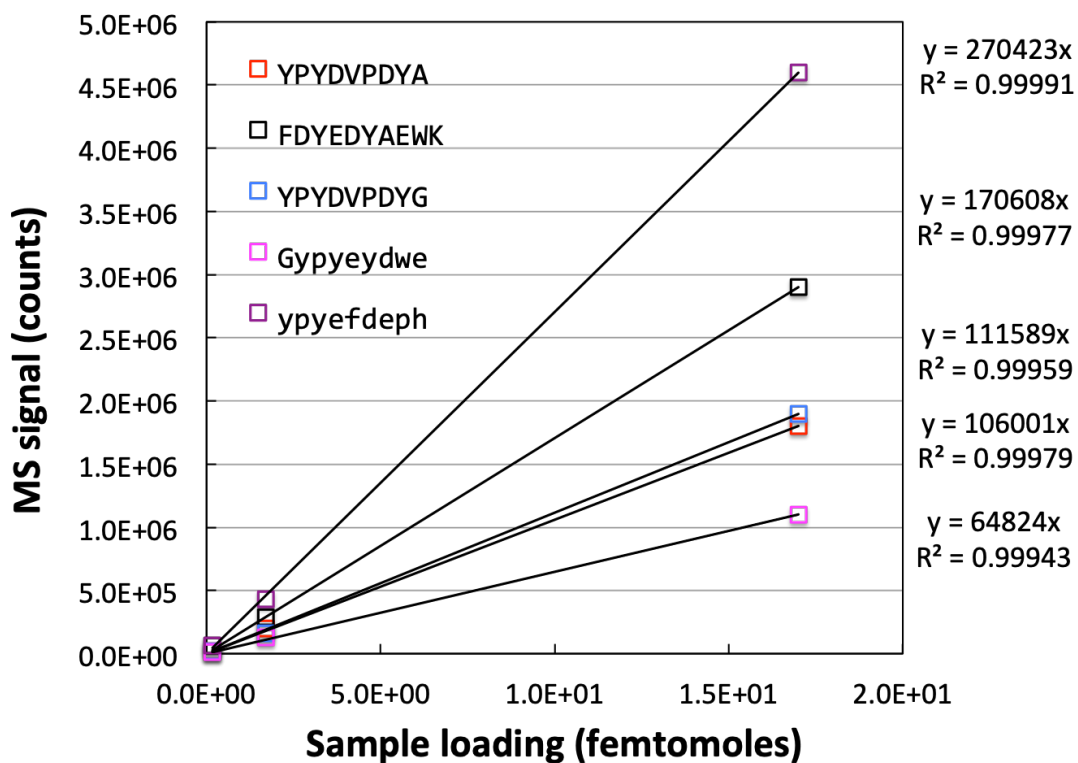

**Supplementary Figure 7.** A plot of MS signal as a function of sample loading illustrates the ~5-fold variation in signal magnitude between 5 different anti-HA binders. For each peptide, a 10-fold change in sample loading corresponded to a 10-fold change in signal. Therefore, for a given peptide, the ratio of signals in two samples corresponds to their relative concentrations.

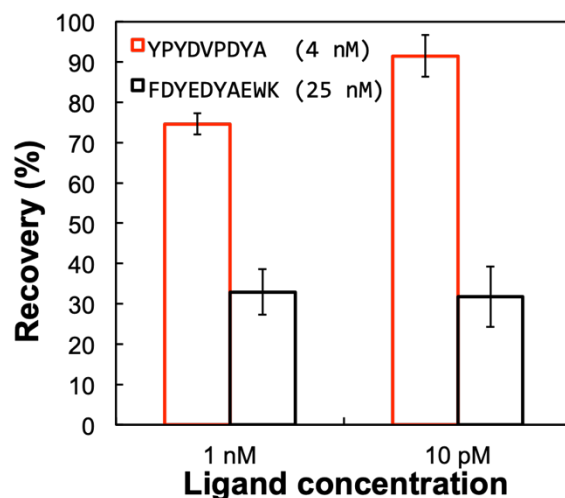

**Supplementary Figure 8.** Recoveries of 12ca5-binding peptides obtained by affinity selection from solutions containing either 1 nM or 10 pM/peptide of starting mixture. Of the 5 peptides examined (**Supplementary Table 1**), only the 2 highest-affinity binders were significantly retained. Error bars correspond to the standard deviations in recovery obtained by 3 technical replicates.

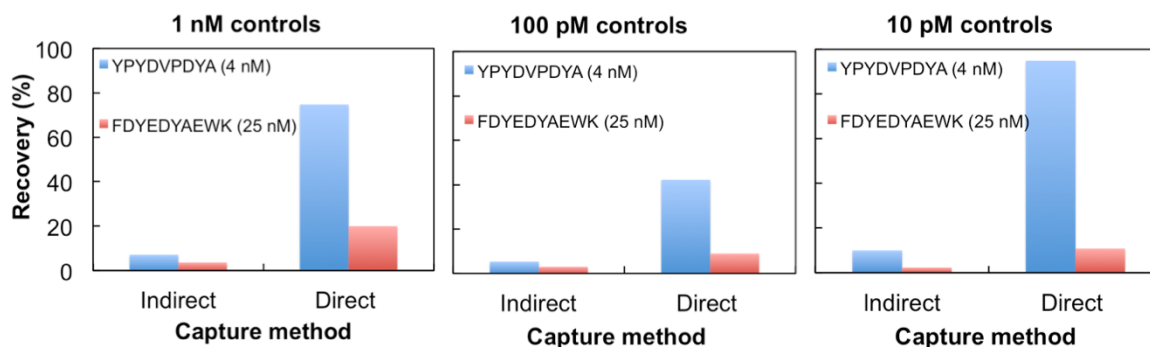

**Supplementary Figure 9. High-affinity 12ca5-binding peptides are efficiently recovered with ‘direct’ capture at high dilution.** Pulldowns were performed using 100 nM 12ca5 and the indicated ligand concentrations. Recoveries were determined by nLC-MS analysis of the peptide mixtures obtained by ‘direct’ or ‘indirect’ capture, relative to a reference analysis (the amount of material corresponding to 100% retention). Raw ion counts were normalized to an internal standard to account for run-to-run variability in MS response.

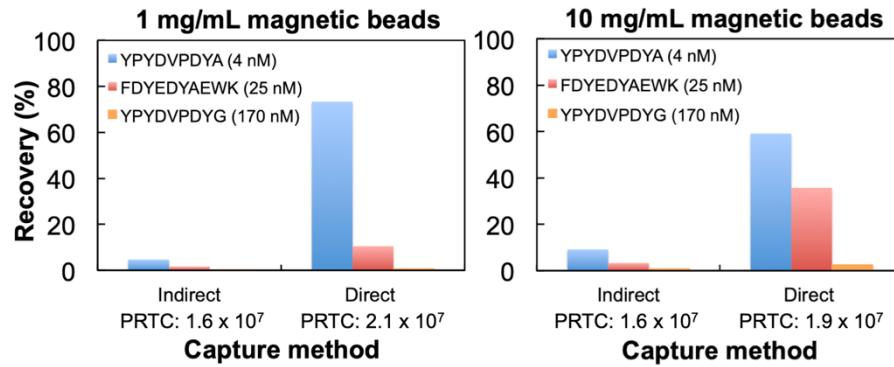

**Supplementary Figure 10.** Magnetic bead concentration does not significantly improve recovery for high affinity binders. For lower affinity binders, recovery is only slightly improved. Counts of reference PRTC ion ( $m/z = 422.74$ ) are indicated below each condition.

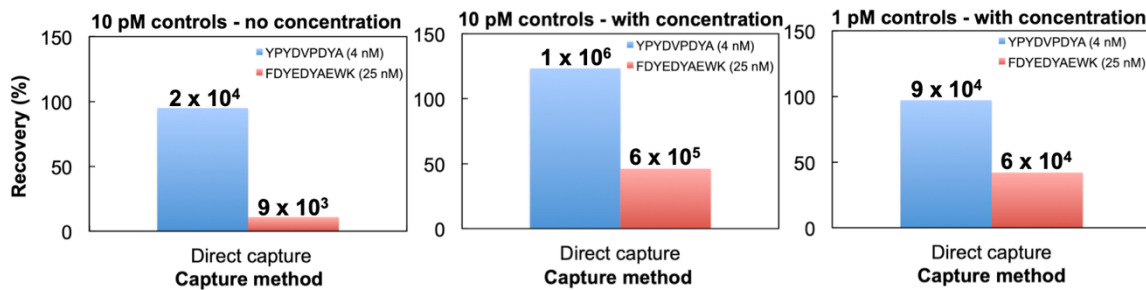

**Supplementary Figure 11.** Detection of recovered 12ca5 binders from 1 pM concentration is enabled with post-pulldown concentration of eluate. Efficient recovery and robust MS signals were obtained from as little as 1 pM of 12CA5 binders in 1 mL volume.

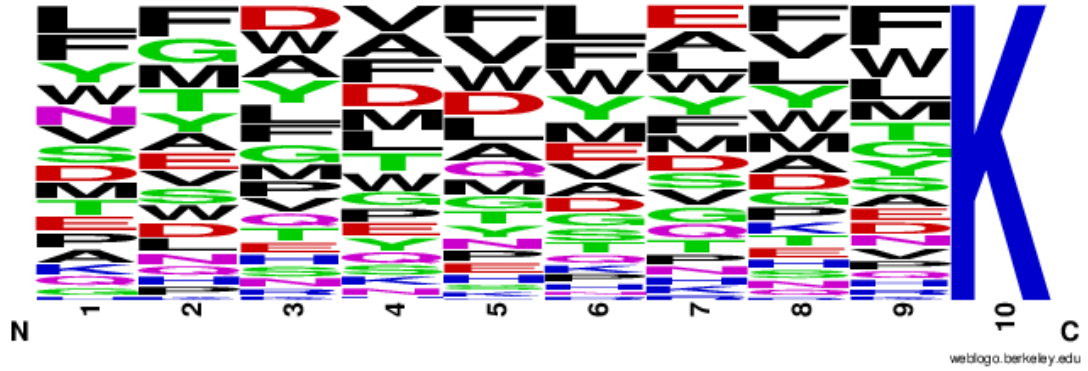

**Supplementary Figure 12.** nLC-MS/MS characterization of a (X)<sub>9</sub>K-CONH<sub>2</sub> library, synthesized on  $2 \times 10^8$  beads of 30  $\mu$ M TentaGel resin, identifies 406 individual peptide sequences with an average local confidence (ALC) score  $\geq 80$  from a theory of 940 beads cleaved. A positional frequency plot based on these 406 sequences is shown.

Sequence: APYDVDPDYA<sup>α</sup>-CONH<sub>2</sub>

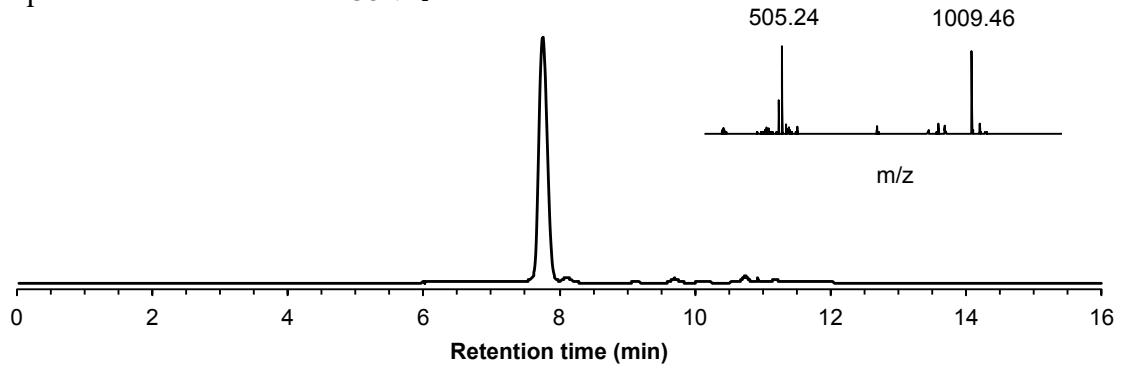

**Supplementary Figure 13.** LC-MS characterization of HA epitope Tyr1Ala mutant (monoisotopic mass: 1008.44 Da; found: 1008.46 Da).

Sequence: YAYDVDPDYA<sup>α</sup>-CONH<sub>2</sub>

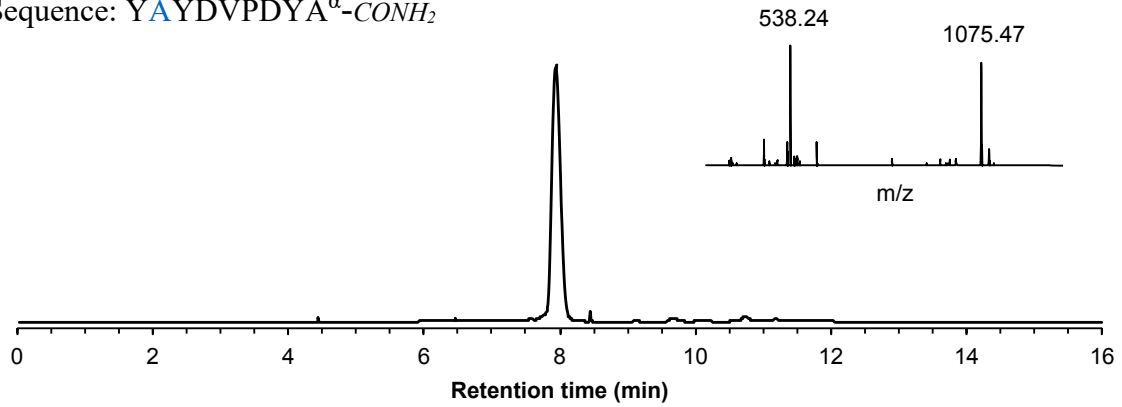

**Supplementary Figure 14.** LC-MS characterization of HA epitope Pro2Ala mutant (monoisotopic mass: 1074.46 Da; found: 1075.47 Da).



Sequence: YP**A**DVPDYA<sup>α</sup>-CONH<sub>2</sub>

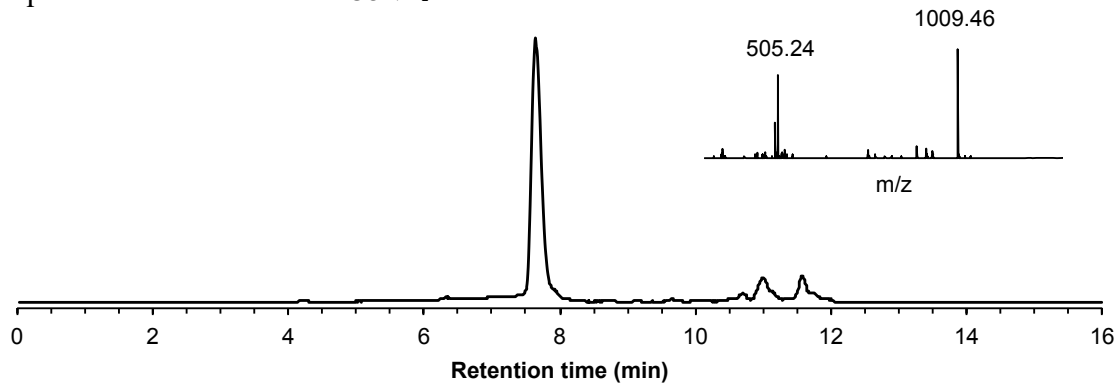

**Supplementary Figure 15.** LC-MS characterization of HA epitope Tyr3Ala mutant (monoisotopic mass: 1008.44 Da; found: 1008.46 Da).

Sequence: YPY**A**VDPDYA<sup>α</sup>-CONH<sub>2</sub>

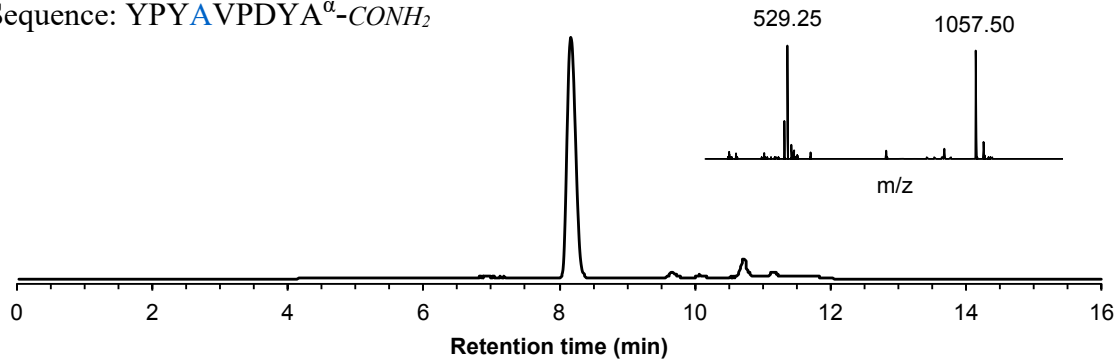

**Supplementary Figure 16.** LC-MS characterization of HA epitope Asp4Ala mutant (monoisotopic mass: 1056.48 Da; found: 1056.49 Da).

Sequence: YPYD**A**PDYA<sup>α</sup>-CONH<sub>2</sub>

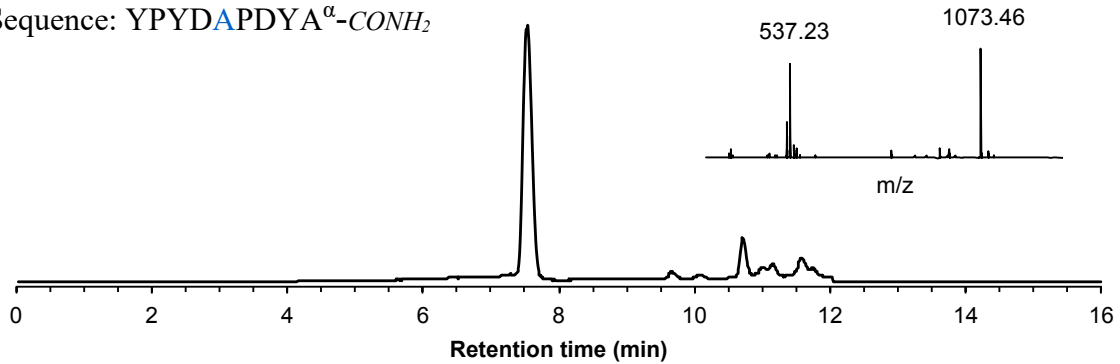

**Supplementary Figure 17.** LC-MS characterization of HA epitope Val5Ala mutant (monoisotopic mass: 1072.44 Da; found: 1072.45 Da).

Sequence: YPYDVADYA<sup>α</sup>-CONH<sub>2</sub>

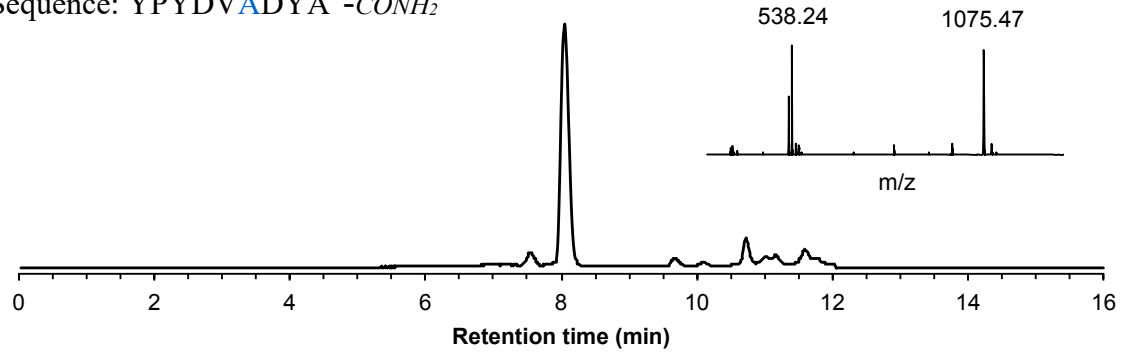

**Supplementary Figure 18.** LC-MS characterization of HA epitope Pro6Ala mutant (monoisotopic mass: 1074.46 Da; found: 1074.47 Da).

Sequence: YPYDVPAYA<sup>α</sup>-CONH<sub>2</sub>

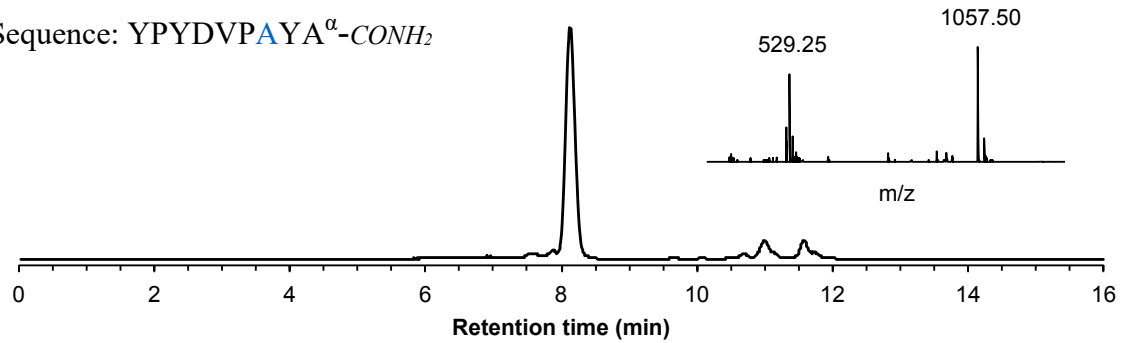

**Supplementary Figure 19.** LC-MS characterization of HA epitope Asp7Ala mutant (monoisotopic mass: 1056.48 Da; found: 1056.49 Da).

Sequence: YPYDVPDAA<sup>α</sup>-CONH<sub>2</sub>

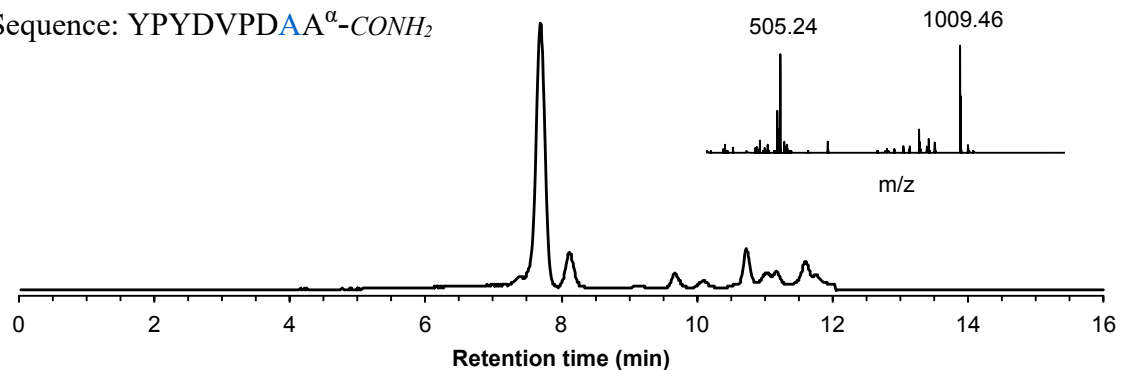

**Supplementary Figure 20.** LC-MS characterization of HA epitope Tyr8Ala mutant (monoisotopic mass: 1008.44 Da; found: 1008.46 Da).

LC-MS characterization of HA epitope mutant Ala9Gly is provided in **Supplementary Figure 3**.

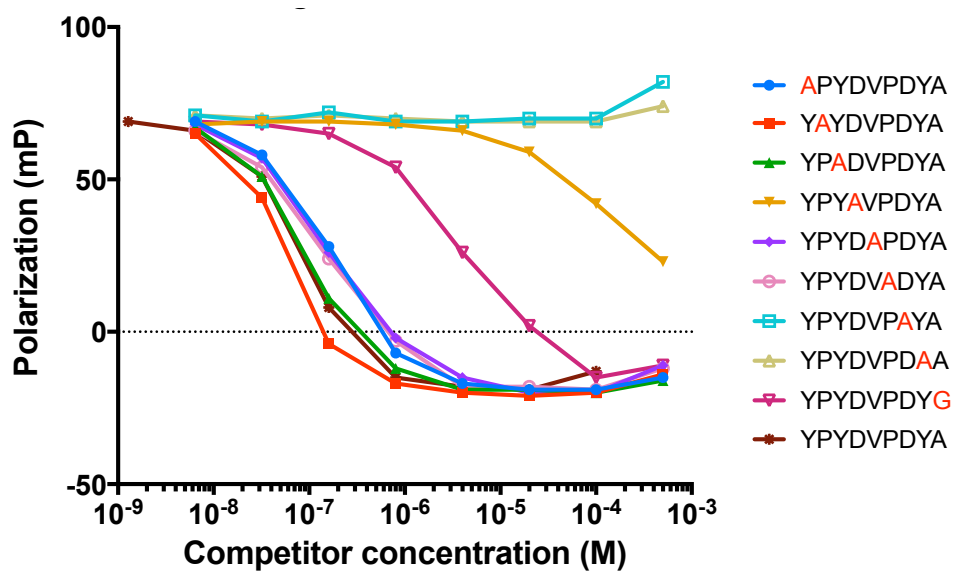

**Supplementary Figure 21. Competition fluorescence polarization of HA epitope Ala scan mutants reveals Asp4, Asp7, Tyr8, and Ala9 as ‘hot spot’ residues.** Mutations to Asp7 and Tyr8 completely abrogated affinity towards 12ca5, while mutations to Asp4 and Ala9 were deleterious but did not completely abolish binding. Mutations elsewhere had a lesser effect on affinity.

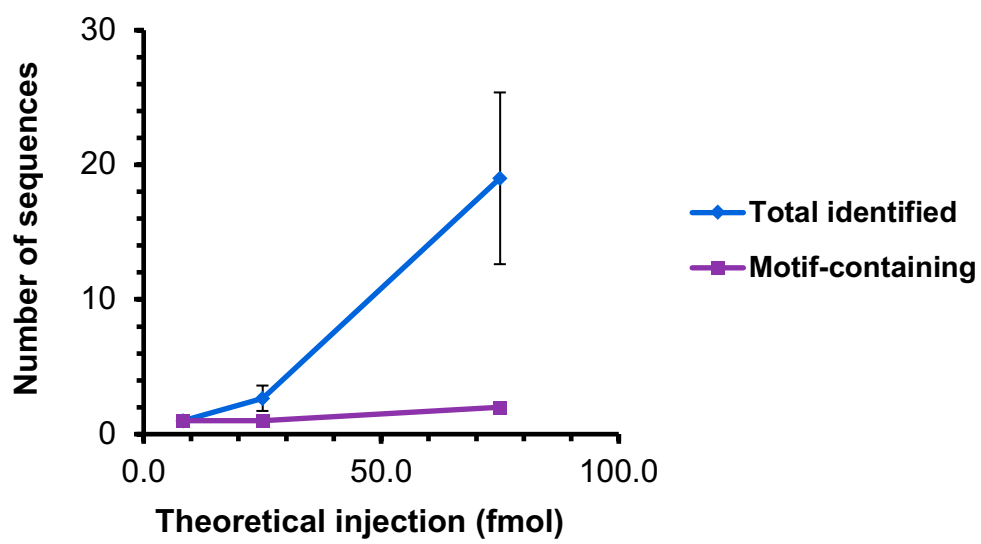

**Supplementary Figure 22. Enrichment decreases at increased sample loadings in a selection for 12ca5-binding performed at 200 pM/member.** At the highest injection amount analyzed, two additional DXXDY(A/S)-containing sequences were identified, along with an average of 18 additional background sequences. Error bars correspond to one standard deviation of three replicate experiments.

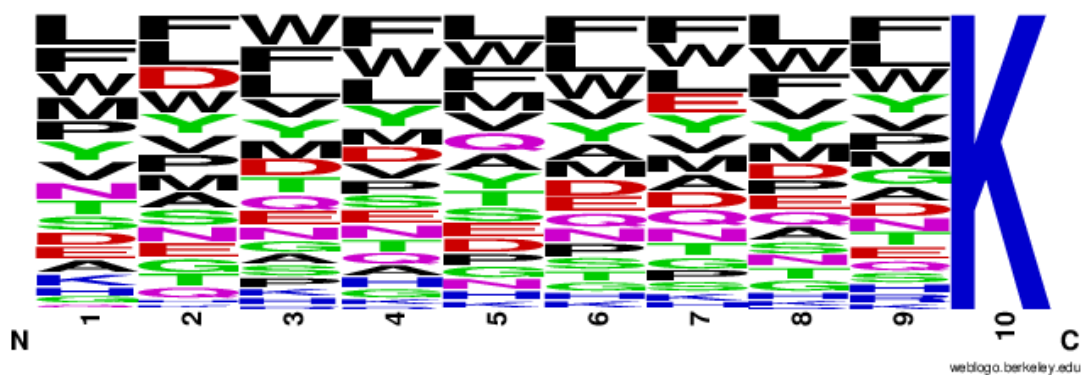

**Supplementary Figure 23.** nLC-MS/MS characterization of a (X)<sub>9</sub>K-CONH<sub>2</sub> library, synthesized on  $1.3 \times 10^9$  beads of  $20 \mu\text{M}$  TentaGel resin, identifies 1471 individual peptide sequences with an ALC score  $\geq 80$  from a theory of 805 beads cleaved. A positional frequency plot based on these 1470 sequences is shown.

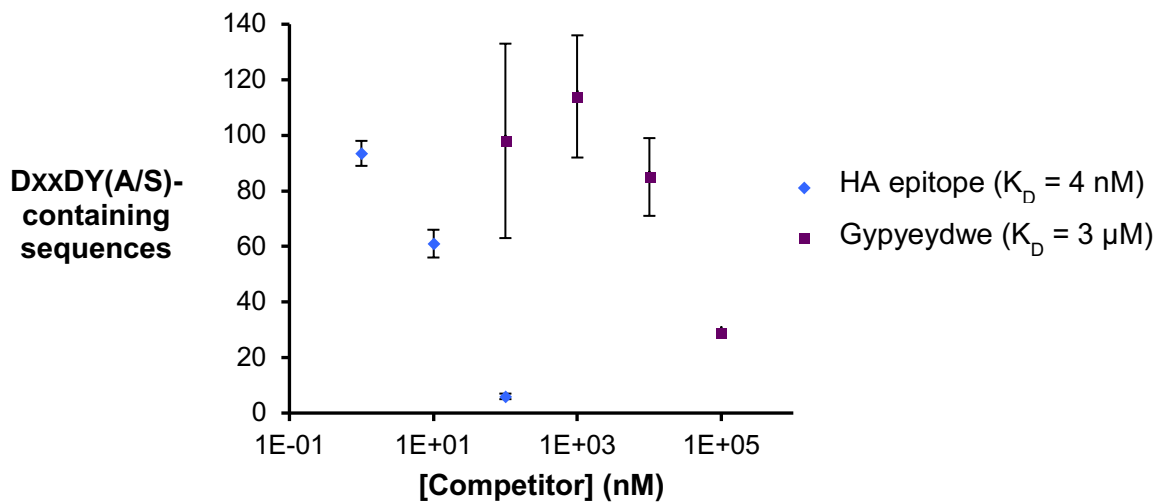

**Supplementary Figure 24.** Exogenous HA epitope ( $K_D = 4$  nM) could impede recovery of DXXDY(A/S)-containing sequences when included at 1:1 stoichiometry relative to 12ca5, while the peptide ‘Gypyeidwe’ ( $K_D = 3$   $\mu$ M) inhibited recovery only when present at 1000:1 stoichiometry relative to 12ca5. Error bars correspond to standard deviations from two experimental replicates.

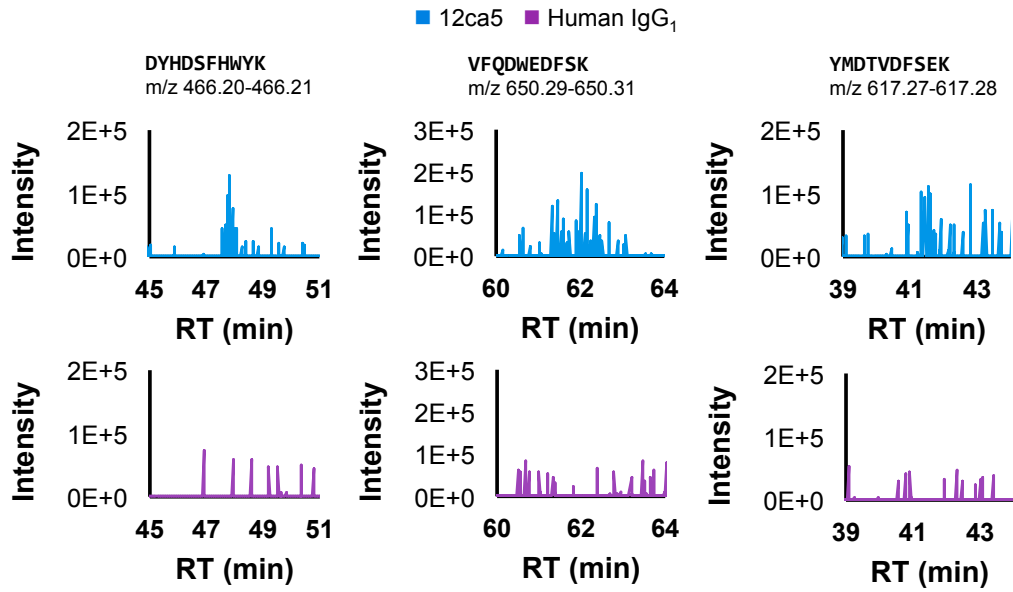

**Supplementary Figure 25.** Extracted ion chromatograms (EICs) for peptides that were sequenced in 12ca5 selections, but not IgG<sub>1</sub> selections, and which may be 12ca5 binders but were possibly mis-sequenced. All peptides shown contain either DXXDFS or DXXDSF. Because the dipeptide masses of 'FS' and 'YA' are identical, incomplete fragmentation could have led to erroneous sequence assignments in these cases. The EICs indicate that these peptides were enriched in 12ca5 selections, suggesting that they could in fact be 12ca5-binding peptides.

■ 12ca5 ■ Human IgG<sub>1</sub>

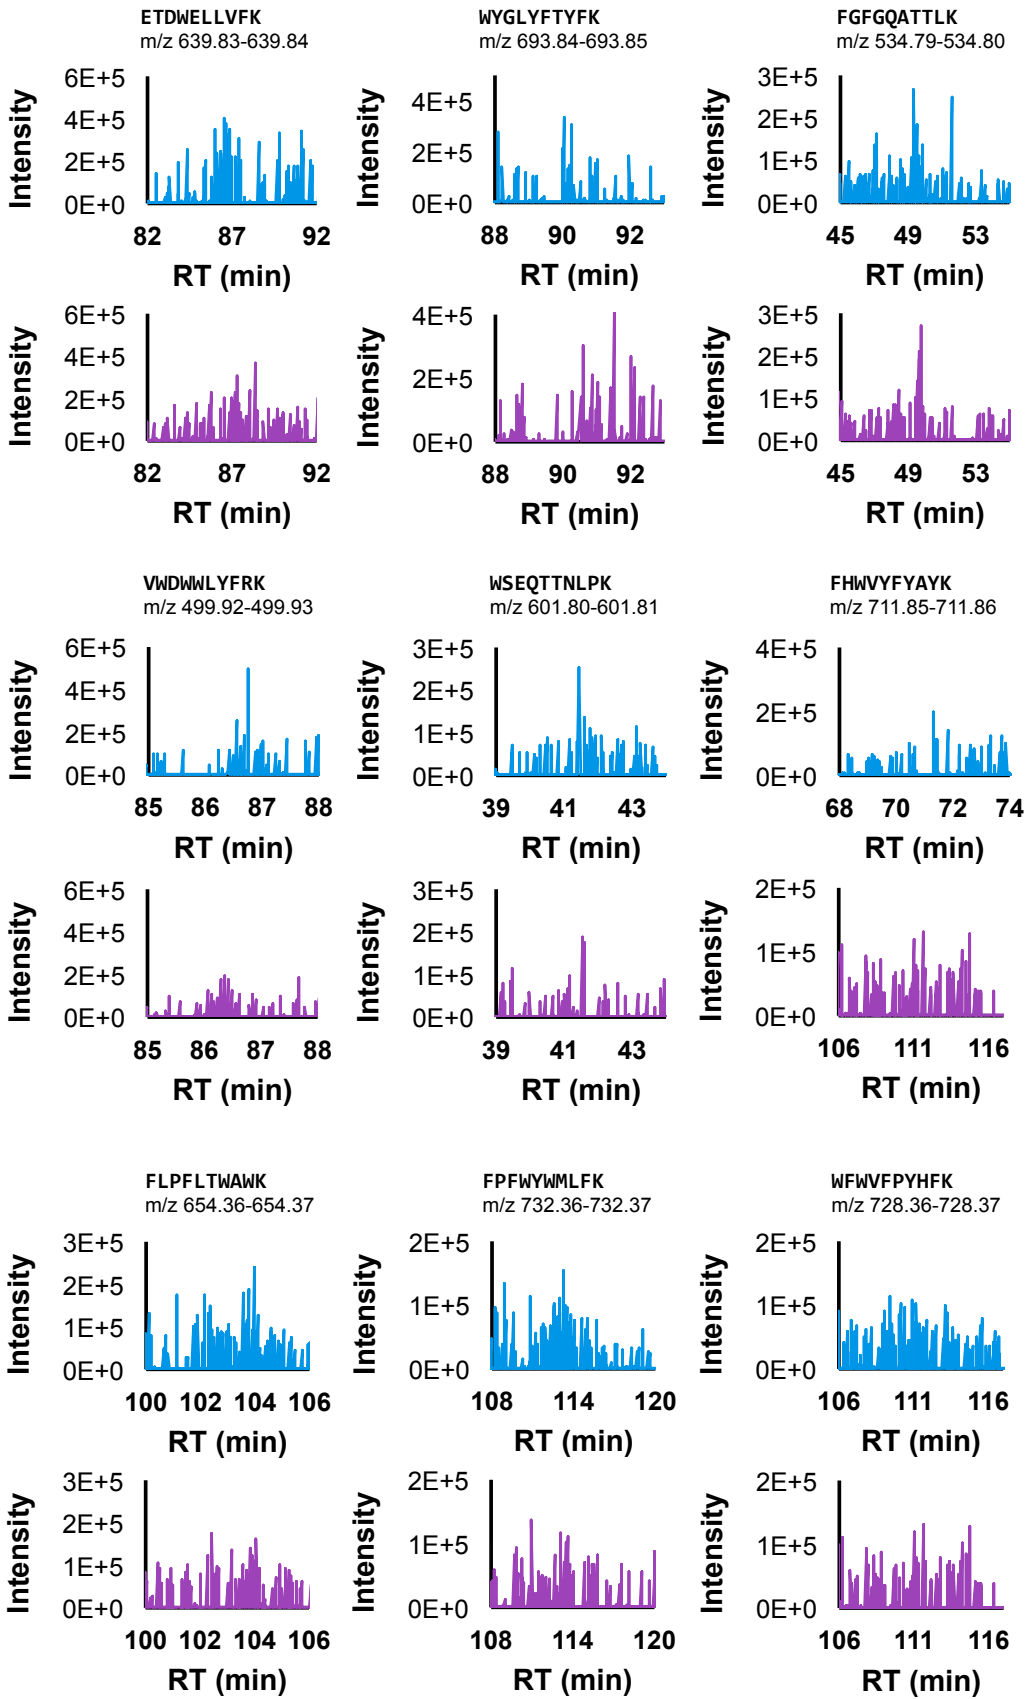



**Supplementary Figure 26.** EICs for peptides that were sequenced in 12ca5 selections, but not IgG<sub>1</sub> selections, and which do not contain the HA epitope. The presence of these peptides is detected in both 12ca5 and IgG<sub>1</sub> selections, indicating that these binders are non-specific, despite only having been sequenced from 12ca5 selections.

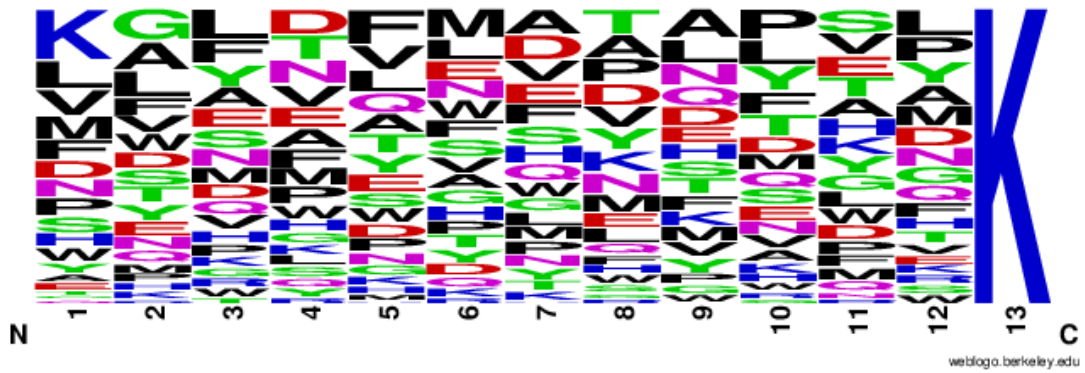

**Supplementary Figure 27.** nLC-MS/MS characterization of a (X)<sub>12</sub>K-CONH<sub>2</sub> library, synthesized on  $1.0 \times 10^9$  beads of 20  $\mu$ M TentaGel resin, identifies 208 individual peptide sequences with an ALC score  $\geq 80$  from a theory of 559 beads cleaved. A positional frequency plot based on these 208 sequences is shown.

a)

Sequence: ETLVRPKPLL LKLLKSVGAQ KDTYTMKEVL FYLGQYIMTK RLYDEKQQHI  
VYCSNDLLGD LFGVPSFSVK EHRKIYTMIV RNLVV<sup>α</sup>-CONH<sub>2</sub>

b)

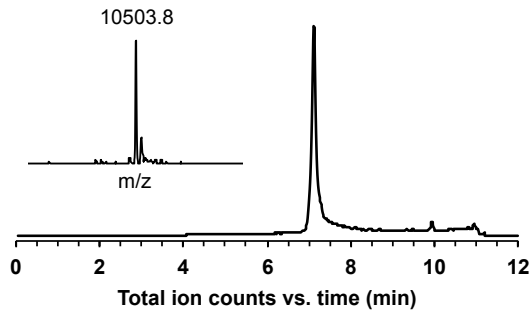

c)

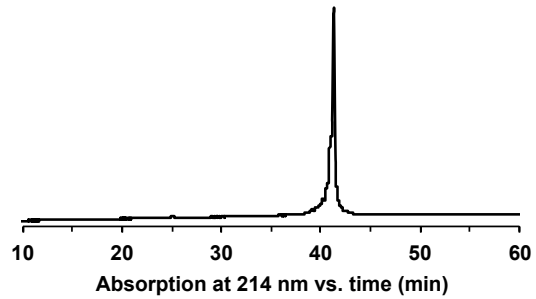

**Supplementary Figure 28.** a) Sequence of (25-109)MDM2. K36 is indicated in red. b) LC-MS characterization of (25-109)MDM2 K36(biotin) (monoisotopic mass: 10502.5 Da; found (by deconvolution): 10503.8 Da). c) Analytical HPLC characterization of (25-109)MDM2 K36(biotin).

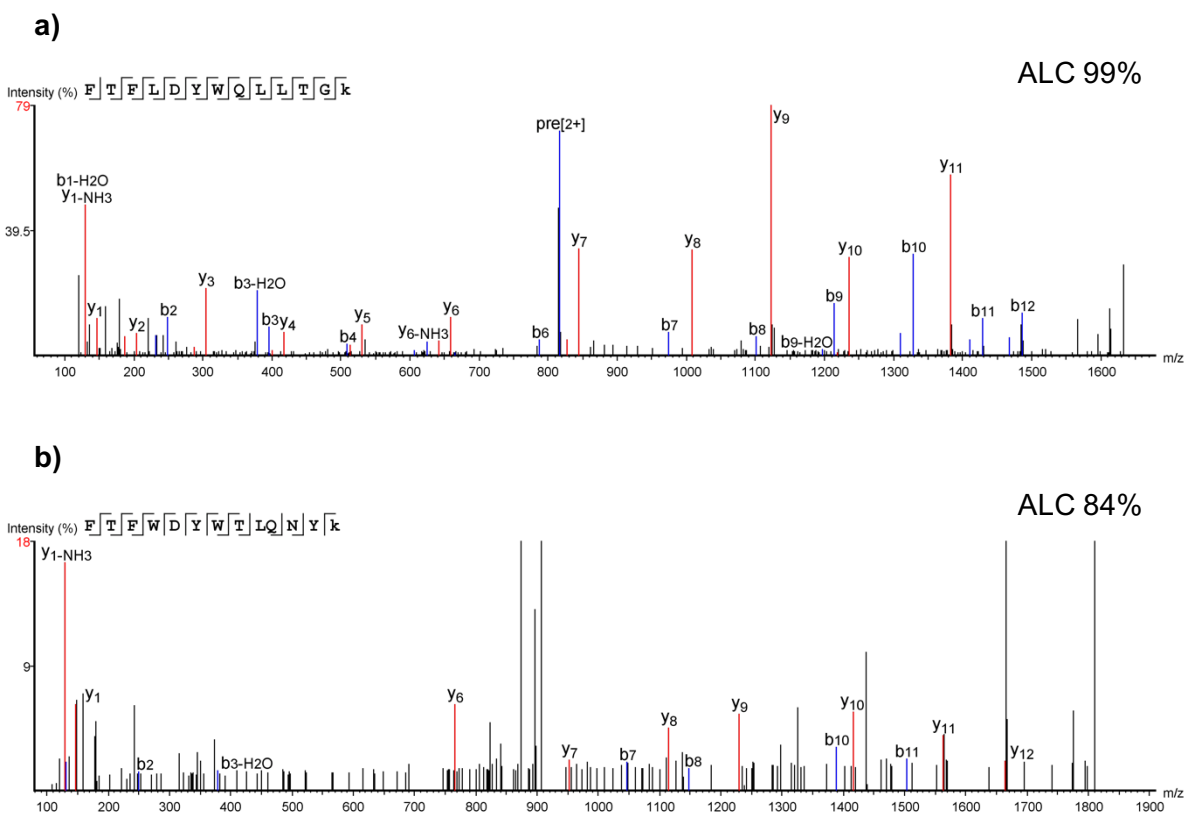

**Supplementary Figure 29. Incomplete peptide backbone fragmentation during MS/MS results in potentially inaccurate sequence assignments.** a) A complete ladder of y and b ions from MS/MS analysis enables the high-confidence sequence assignment of FTFLDYWQLLTGK, which contains the MDM2-binding, FXXXWXXL motif. b) Missing y4 and b9 ions prevent a high-confidence assignment of ‘LQ’ vs. ‘QL’ in the sequence FTFWDYWTLQNYK, which would contain the FXXXWXXL motif if the relative positions of Leu and Gln were inverted.

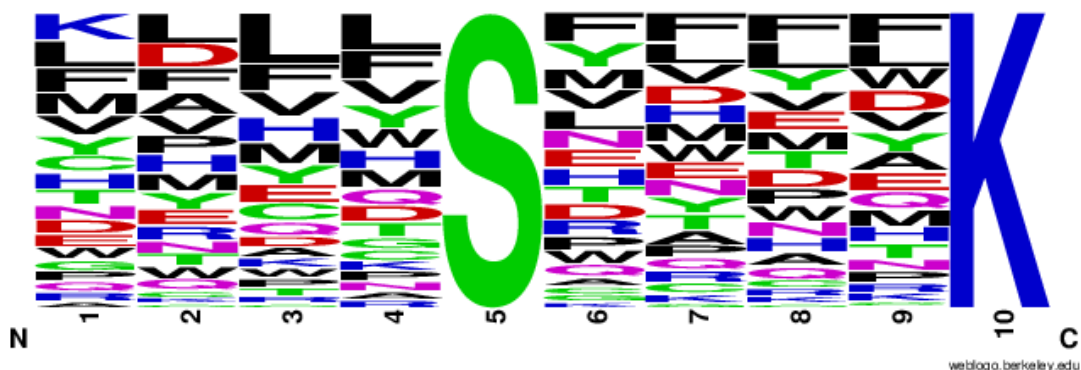

**Supplementary Figure 30.** nLC-MS/MS characterization of a  $(X)_4(pS)(X)_4K$ -CONH<sub>2</sub> library, synthesized on  $2 \times 10^8$  beads of 30  $\mu$ M TentaGel resin, identifies 617 individual peptide sequences with an average local confidence (ALC) score  $\geq 80$  from a theory of 475 beads cleaved. A positional frequency plot based on these 617 sequences is shown. Abbreviations: A =  $\beta$ -alanine; C = ornithine; D = D-aspartate; E = aminoadipic acid; F = cyclohexyl alanine; G = diaminobutyric acid; H = thiazolyl alanine; K = D-lysine (positions 1-9) or L-lysine (position 10); L = D-leucine; N =  $\beta$ -homothreonine; P = hydroxyproline; M = cyclopropylalanine; Q = D-glutamine; R = 4-aminophenylalanine; S = phosphoserine; T =  $\beta$ -homoserine; V = norvaline; W = 4-nitrophenylalanine; Y = 4-fluorophenylalanine.

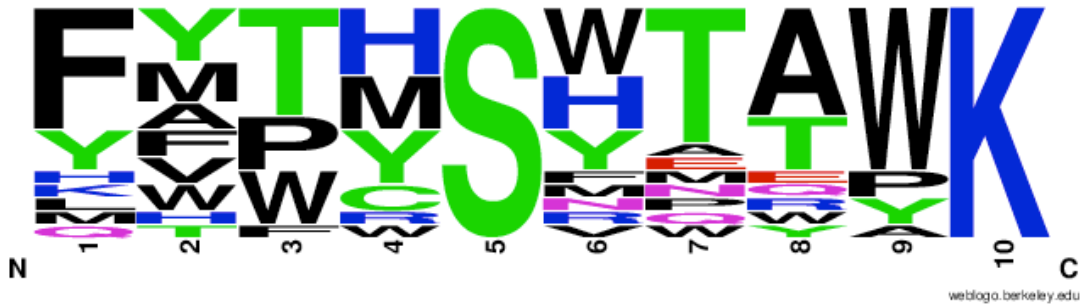

**Supplementary Figure 31. Selections of a library comprised of non-canonical amino acids against 14-3-3 $\gamma$  identify sequences with prominent N-term and C-term motifs.** A positional frequency analysis of all identified 14-3-3 $\gamma$ -unique peptides (17 in total) reveals a somewhat conserved FXT motif at the N-term, and a more prominent T(A/T)W motif near the N-term. Abbreviations: A =  $\beta$ -alanine; C = ornithine; D = D-aspartate; E = aminoadipic acid; F = cyclohexyl alanine; G = diaminobutyric acid; H = thiazolyl alanine; K = D-lysine (positions 1-9) or L-lysine (position 10); L = D-leucine; M = cyclopropylalanine; N =  $\beta$ -homothreonine; P = hydroxyproline; Q = D-glutamine; R = 4-aminophenylalanine; S = phosphoserine; T =  $\beta$ -homoserine; V = norvaline; W = 4-nitrophenylalanine, Y = 4-fluorophenylalanine.

**a) 14.3.3.1 (EIC: m/z 734.28 – 734.29)**

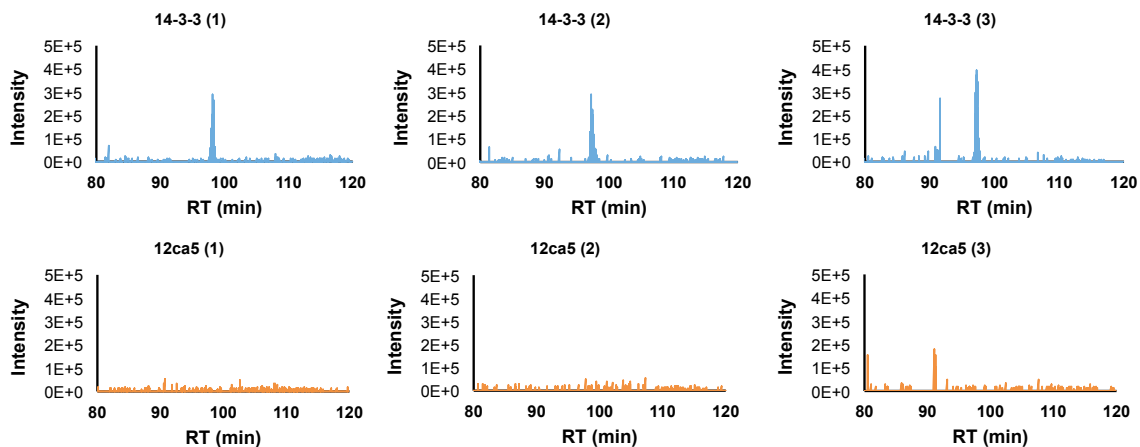

**b) 14.3.3.6 (EIC: m/z 710.84 – 710.85)**

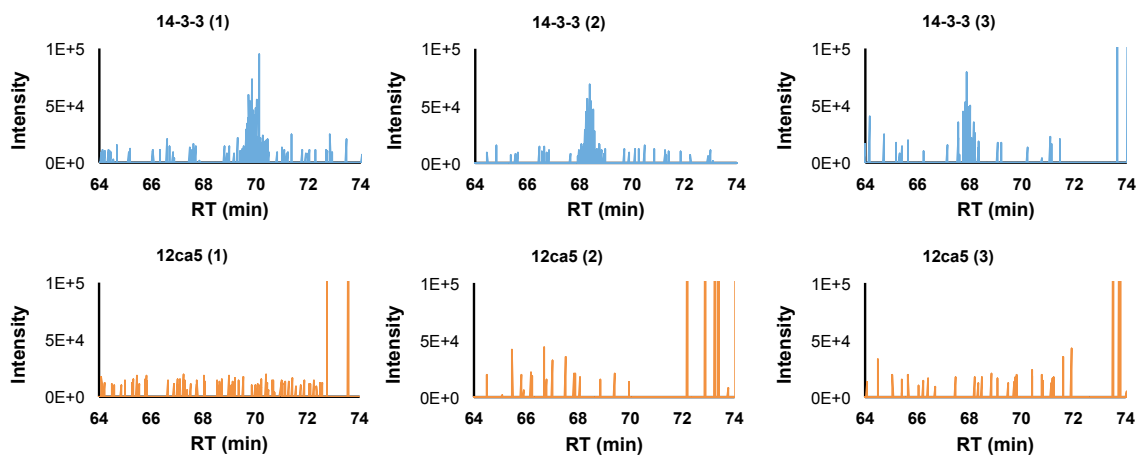

**c) 14.3.3.12 (EIC: m/z 721.78 – 721.79)**

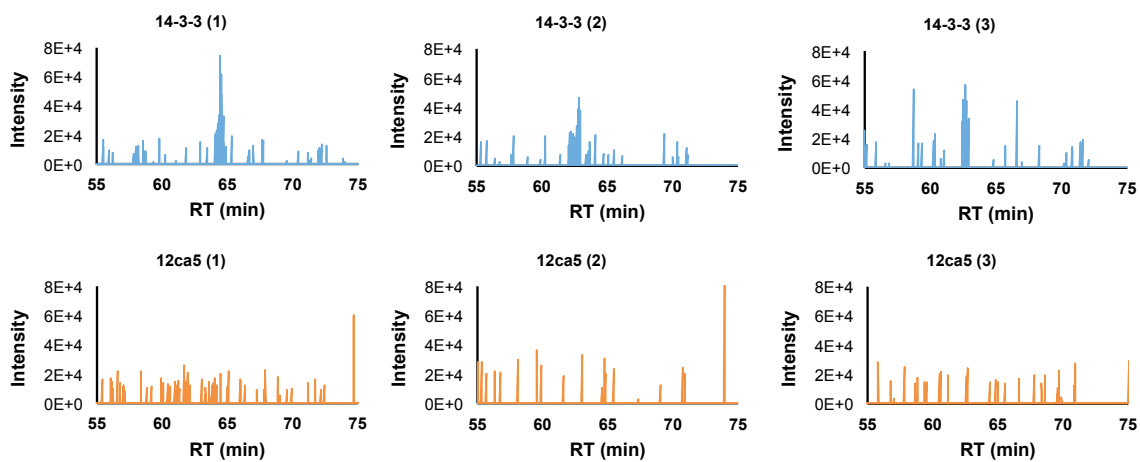

**Supplementary Figure 32. Select putative 14-3-3 $\gamma$  binders are reproducibly pulled down in the presence of 14-3-3.** Extracted ion chromatograms (EICs) of a subset of 14-3-3 $\gamma$ -unique sequences reveal these peptides were retained in each selection replicate against 14-3-3 $\gamma$  (blue traces). Signals for these peptides are also absent in the chromatograms from 12ca5 selections (orange traces), suggesting they were pulled down to the presence of 14-3-3. Three peptides are examined here: a) **14.3.3.1**, b) **14-3-3.6**, and c) **14-3-3.12** (**Supplementary Table 11**).



a)

| Construct | Sequence |       |       |       |      |       |     |     |       |     | ALC (%) |
|-----------|----------|-------|-------|-------|------|-------|-----|-----|-------|-----|---------|
| NB.1      | D-Lys    | β-Ser | D-Gln | Thz   | pSer | Aad   | Thz | Nph | β-Thr | Lys | 92      |
| NB.2      | Hyp      | Nph   | Thz   | D-Asp | pSer | β-Ala | Cpa | Fph | Thz   | Lys | 86      |

b) NB.1 (EIC: m/z 476.85-476.86)

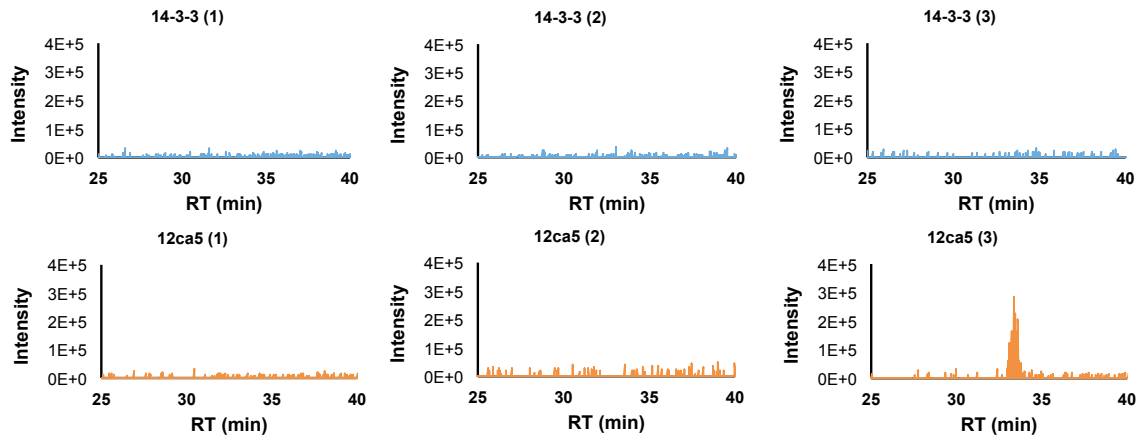

c) NB.2 (EIC 694.73 – 694.74)

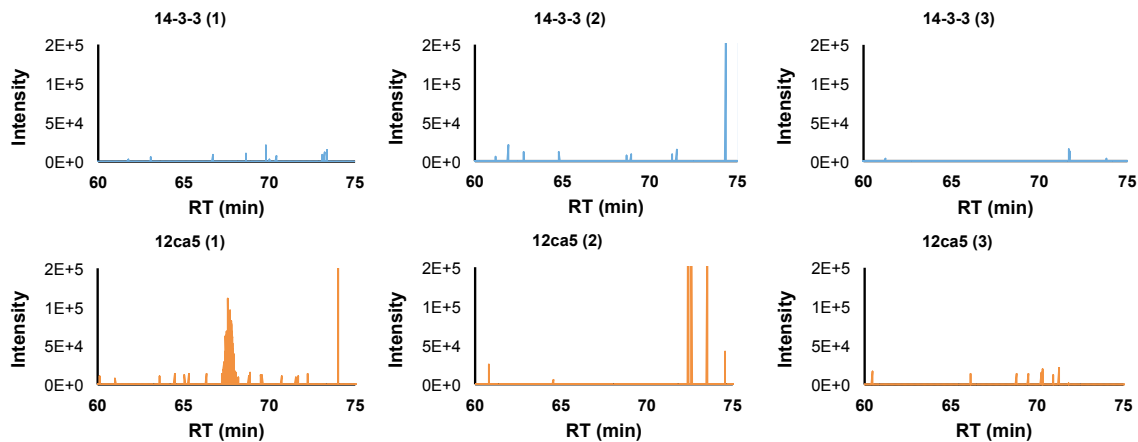

**Supplementary Figure 33. 12ca5-unique sequences are not reproducibly pulled down and are likely selection artifacts.** a) Peptide sequences identified from selections against 12ca5. b) EICs of putative 12ca5-binding peptide **NB.1** and c) **NB.2** from each selection replicate. In both cases, the putative 12ca5-binding peptide was only identified in one of three replicates, indicating it is likely an artifact from the selection rather than a true 12ca5 binder.

Construct: FITC-labeled **14-3-3.1**

Sequence: D-Leu-Nph-β-Ser-Nph-pSer-Nph-β-Ser-β-Ala-Nph-Lys-β-Ala-Lys(FITC)

Structure:

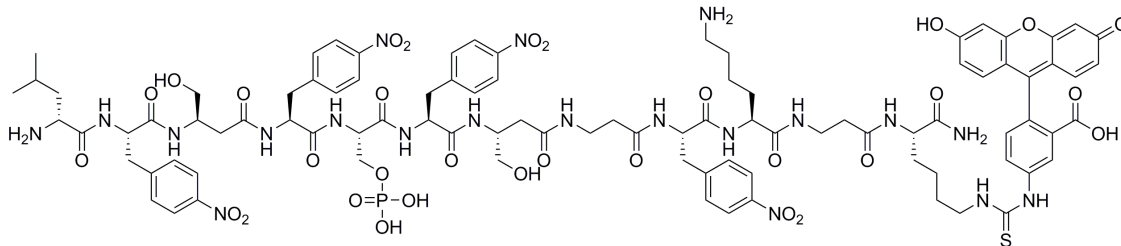

LC-MS trace:

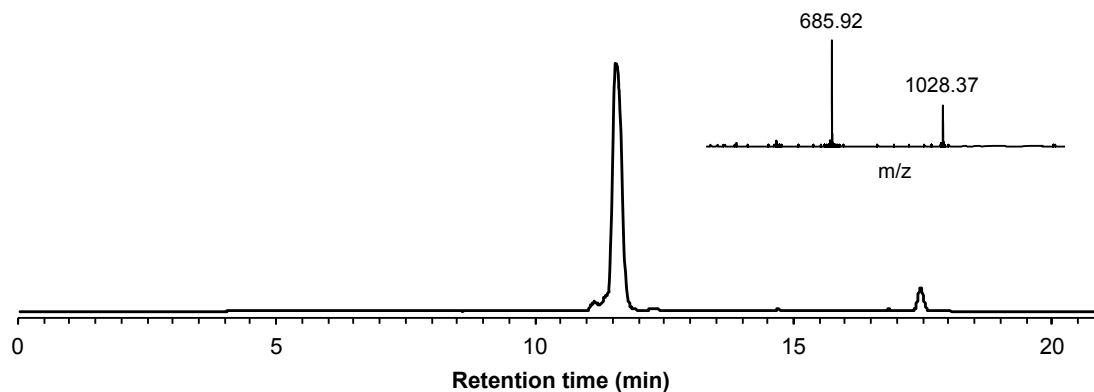

**Supplementary Figure 34.** LC-MS characterization of FITC-labeled **14-3-3.1** (monoisotopic mass: 2054.72 Da; found: 2054.72 Da). β-Ala spacer and FITC label are indicated in the sequence in blue.

Construct: FITC-labeled **14-3-3.6**

Sequence: Cha-Cha- $\beta$ -Ser-Orn-pSer-Nph- $\beta$ -Ser- $\beta$ -Ser-Nph-Lys- $\beta$ -Ala-Lys(FITC)

Structure:

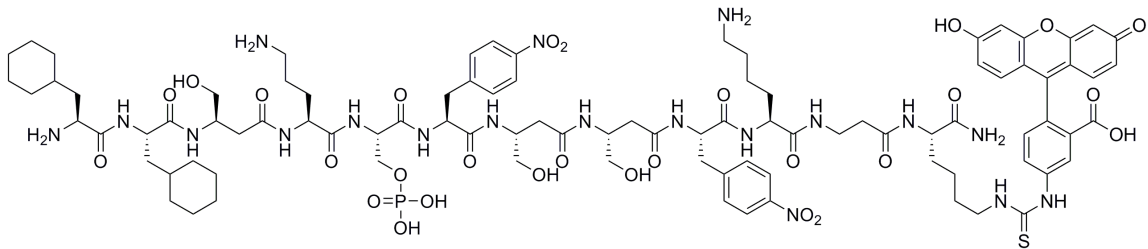

LC-MS trace:

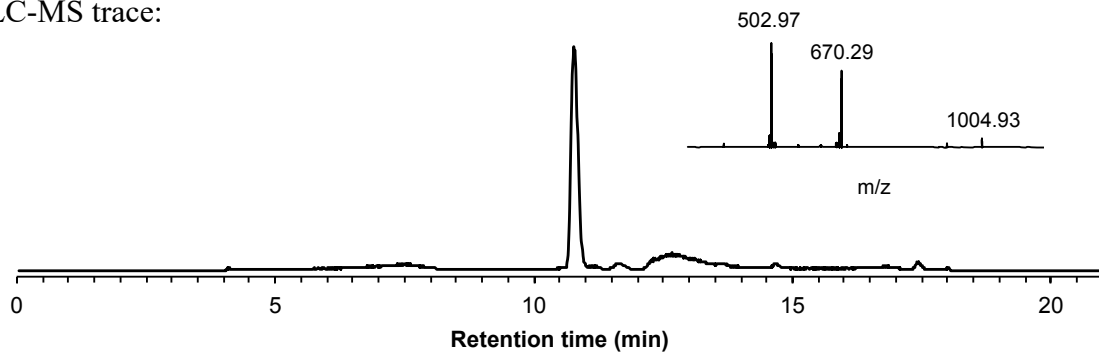

**Supplementary Figure 35.** LC-MS characterization of FITC-labeled **14-3-3.6** (monoisotopic mass: 2007.85 Da; found: 2007.85 Da).  $\beta$ -Ala spacer and FITC label are indicated in the sequence in blue.

Construct: FITC-labeled **14-3-3.12**

Sequence: D-Lys-Nva-Nph-Thz-pSer-Nph- $\beta$ -Ser- $\beta$ -Ala-Nph-Lys- $\beta$ -Ala-Lys(FITC)

Structure:

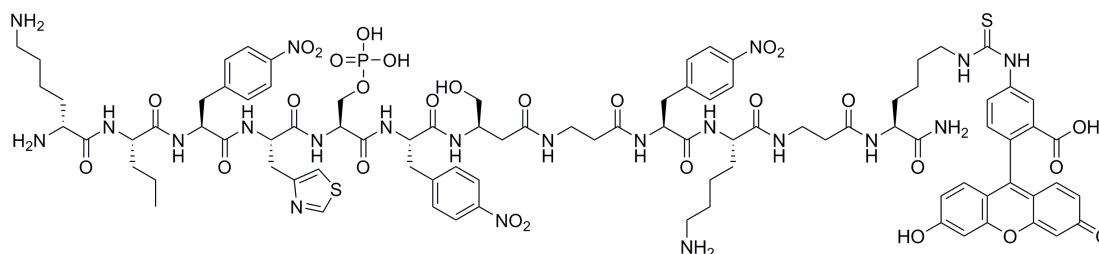

LC-MS trace:

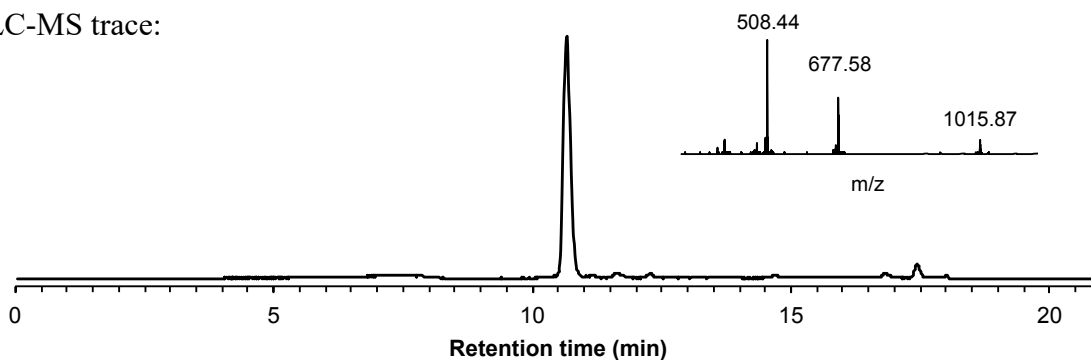

**Supplementary Figure 36.** LC-MS characterization of FITC-labeled **14-3-3.12** (monoisotopic mass: 2029.72 Da; found: 2029.72 Da).  $\beta$ -Ala spacer and FITC label are indicated in the sequence in blue.

Construct: FITC-labeled **NB.1**

Sequence: D-Lys- $\beta$ -Ser-D-Gln-Thz-pSer-Aad-Thz-Nph- $\beta$ -Thr-Lys- $\beta$ -Ala-  
Lys(FITC)

Structure:

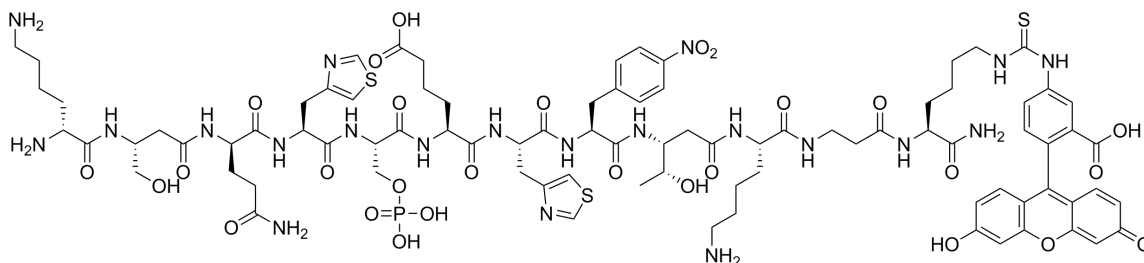

LC-MS trace:

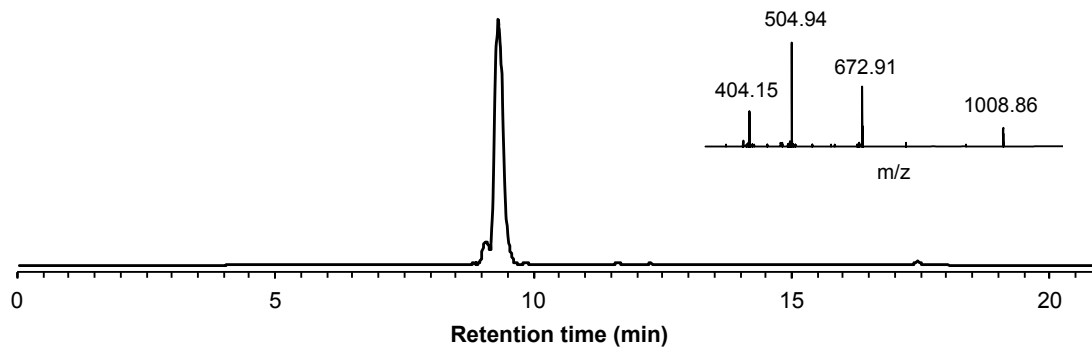

**Supplementary Figure 37.** LC-MS characterization of FITC-labeled **NB.1** (monoisotopic mass: 2015.70 Da; found: 2015.71 Da).  $\beta$ -Ala spacer and FITC label are indicated in the sequence in blue.

Construct: **14-3-3.1**

Sequence: D-Leu-Nph- $\beta$ -Ser-Nph-pSer-Nph- $\beta$ -Ser- $\beta$ -Ala-Nph-Lys

Structure:

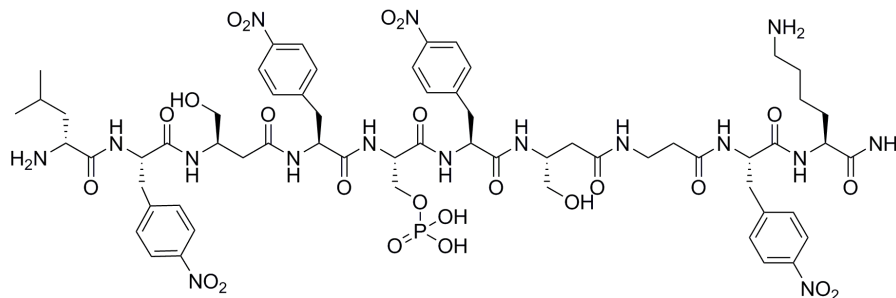

LC-MS trace:

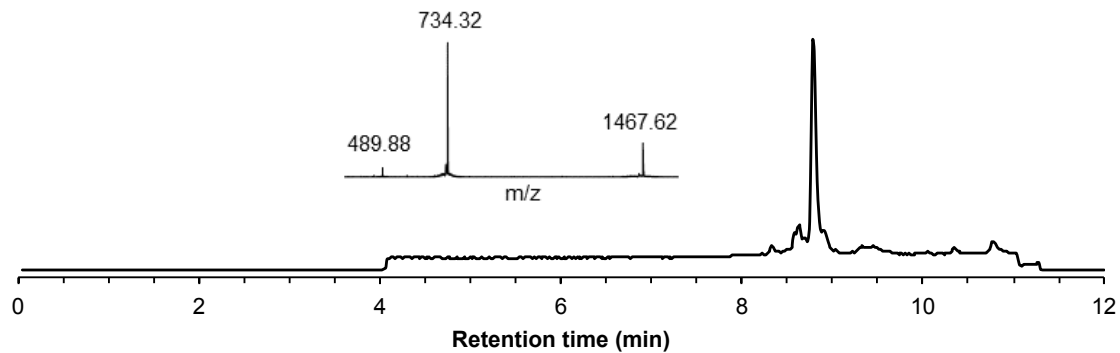

**Supplementary Figure 38.** LC-MS characterization of unlabeled **14-3-3.1** (monoisotopic mass: 1466.55 Da; found: 1466.61 Da).

Construct: **14-3-3.6**

Sequence: Cha-Cha- $\beta$ -Ser-Orn-pSer-Nph- $\beta$ -Ser- $\beta$ -Ser-Nph-Lys

Structure:

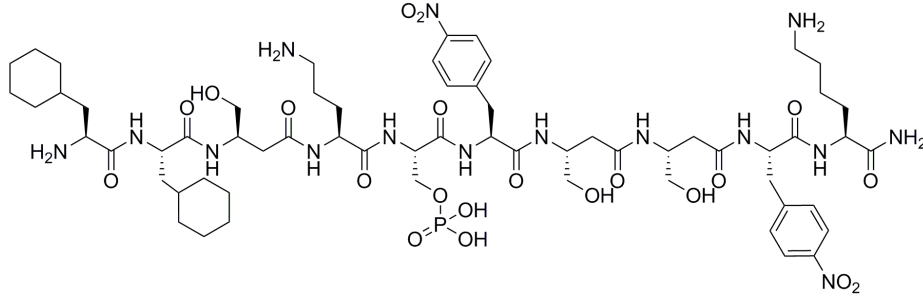

LC-MS trace:

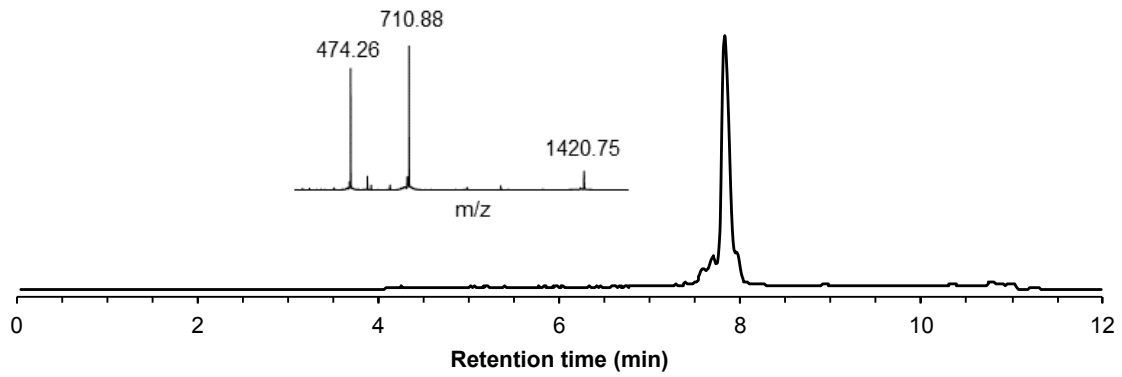

**Supplementary Figure 39.** LC-MS characterization of unlabeled **14-3-3.6** (monoisotopic mass: 1419.68 Da; found: 1419.74 Da).

Construct: **14-3-3.12**

Sequence: D-Lys-Nva-Nph-Thz-pSer-Nph-β-Ser-β-Ala-Nph-Lys

Structure:

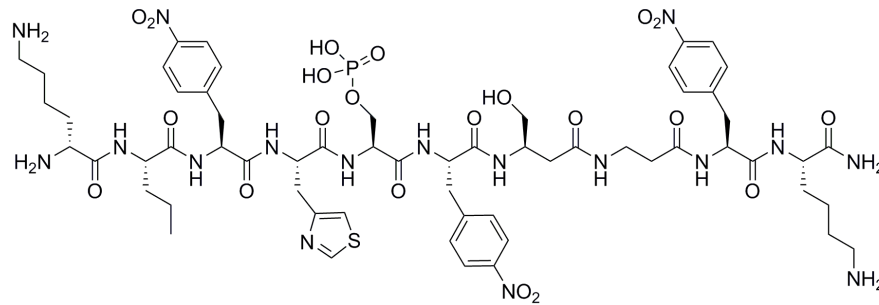

LC-MS trace:

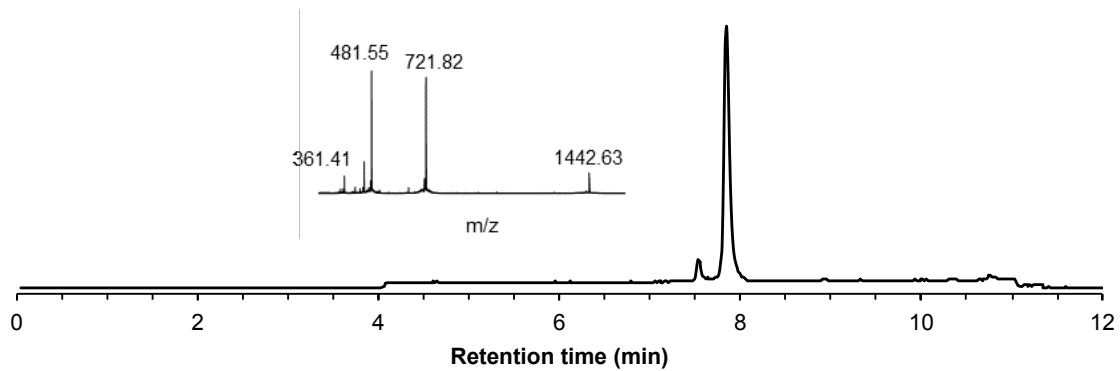

**Supplementary Figure 40.** LC-MS characterization of unlabeled **14-3-3.12** (monoisotopic mass: 1441.55 Da; found: 1441.62 Da).



Construct: **NB.1**

Sequence: D-Lys- $\beta$ -Ser-D-Gln-Thz-pSer-Aad-Thz-Nph- $\beta$ -Thr-Lys

Structure:

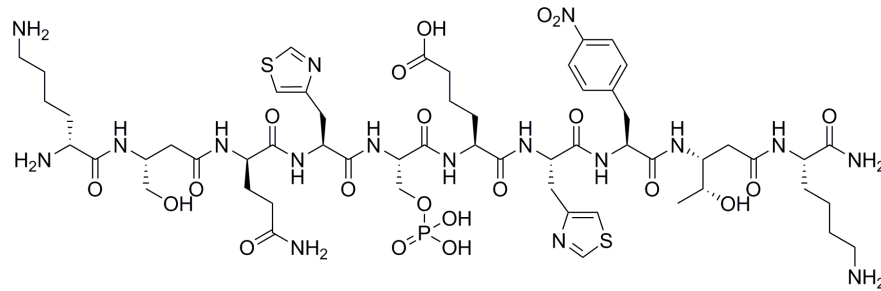

LC-MS trace:

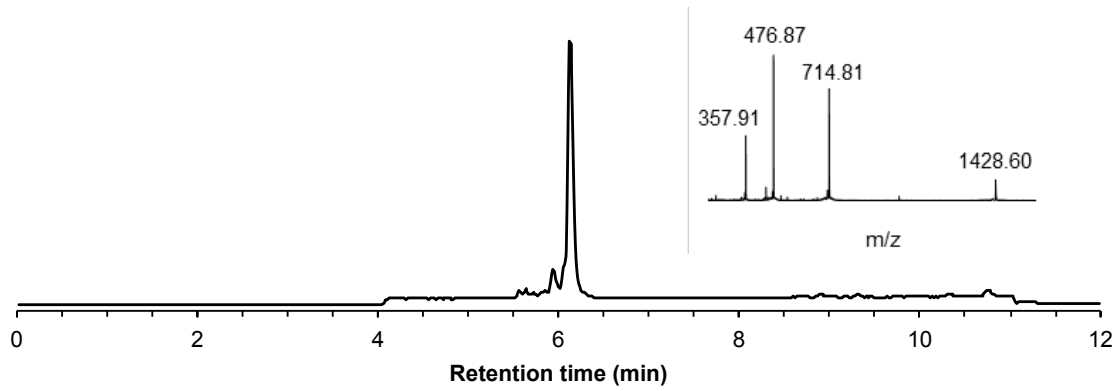

**Supplementary Figure 41.** LC-MS characterization of unlabeled **NB.1** (monoisotopic mass: 1427.54 Da; found: 1427.60 Da).

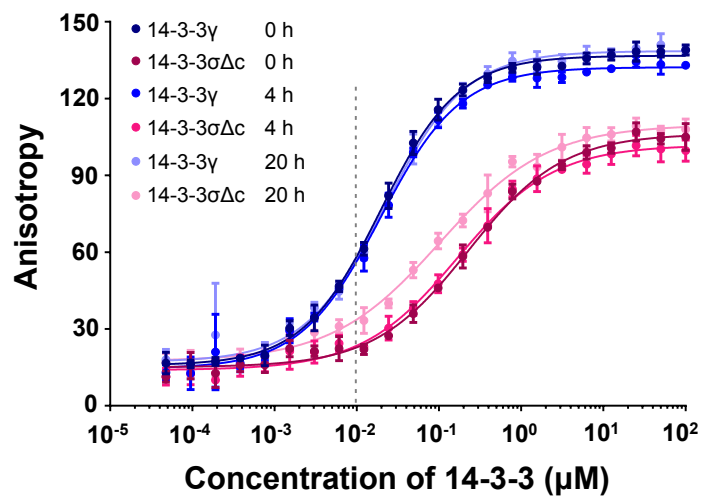

| Time (h) | Isoform         | $K_d$ (nM) |
|----------|-----------------|------------|
| 0        | 14-3-3 $\gamma$ | 19.5       |
| 0        | 14-3-3 $\sigma$ | 228.9      |
| 4        | 14-3-3 $\gamma$ | 19.4       |
| 4        | 14-3-3 $\sigma$ | 169.4      |
| 20       | 14-3-3 $\gamma$ | 21.9       |
| 20       | 14-3-3 $\sigma$ | 101.5      |

**Supplementary Figure 42.** FITC-labeled **14-3-3.12** retains binding activity for 14-3-3 $\sigma$  as measured by fluorescence anisotropy, with 5 to 12-fold reduced affinity relative to that for 14-3-3 $\gamma$ . Measurements were taken either immediately after, 4 h after, or 20 h after incubation of **14-3-2.12** with 14-3-3. Error bars correspond to standard error among three technical replicates.

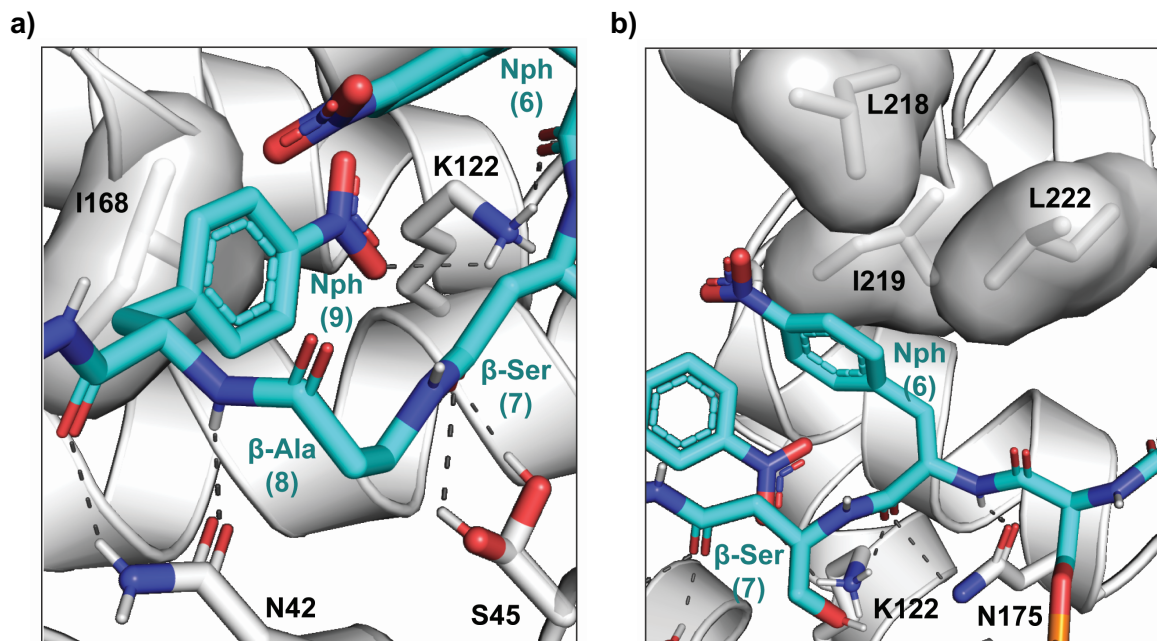

**Supplementary Figure 43.** a) 4-Nitrophenylalanine9 engages in an electrostatic interaction and/or H-bond with the  $\epsilon$ NH<sub>3</sub> group of Lys122 (N–O distance=3.2 Å), and makes a hydrophobic contact with Ile168. b) 4-Nitrophenylalanine6 interacts with the hydrophobic roof of the 14-3-3 binding groove, making hydrophobic contacts with Leu218, Ile219, and Leu222 of 14-3-3 $\sigma$ .

## Supplementary Tables

**Supplementary Table 1. Characterization of 12ca5-binding peptides by competition fluorescence polarization.**

| Binder     | Source             | IC <sub>50</sub> | K <sub>D</sub>       |
|------------|--------------------|------------------|----------------------|
| YPYDVPDYA  | HA epitope         | 85 ± 7 nM        | <b>3.9 ± 1 nM</b>    |
| FDYEDYAEWK | Affinity selection | 590 ± 190 nM     | <b>25 ± 13 nM</b>    |
| YPYDVPDYG  | Ala9Gly mutant     | 3.6 ± 1 μM       | <b>170 ± 70 nM</b>   |
| Gypyeydwe  | On-bead screen     | 62 ± 8 μM        | <b>3.0 ± 0.85 μM</b> |
| ypyefdeph  | On-bead screen     | 380 ± 25 μM      | <b>18 ± 4 μM</b>     |

Model binders include the native HA epitope, a peptide identified from early affinity selection experiments, an Ala9Gly mutant of the native HA epitope, and sequences derived from the loop of 12ca5 xenoprotein binders identified in Gates, Z. P. *et al.* Xenoprotein engineering via synthetic libraries. *Proc. Natl. Acad. Sci. U.S.A.* **115**, E5298-E5306 (2018).<sup>10</sup>

**Supplementary Table 2. Affinity-capture mass spectrometry identifies 12ca5-binding sequences in proportion with library size.**

| Library size        | Peptide             | ALC (%)    | m/z      | z        | RT     | Mass      | ppm       |      |
|---------------------|---------------------|------------|----------|----------|--------|-----------|-----------|------|
| 2 x 10 <sup>6</sup> | MNDLVYADK           | 99         | 599.7725 | 2        | 43.53  | 1197.5337 | -2.7      |      |
|                     | YGMGFVVRMK          | 99         | 406.8743 | 3        | 27.04  | 1217.605  | -3.2      |      |
| 2 x 10 <sup>7</sup> | SFDKHDYAFK          | 99         | 419.539  | 3        | 27.38  | 1255.5986 | -2.7      |      |
|                     | PVDLKDYAEK          | 99         | 392.8788 | 3        | 37.51  | 1175.6187 | -3.6      |      |
|                     | PDLMDYAHFK          | 99         | 417.8641 | 3        | 48.87  | 1250.5754 | -4.0      |      |
|                     | EDLQDYAEFK          | 99         | 628.7915 | 2        | 57.68  | 1255.572  | -2.8      |      |
|                     | FDLADYATAK          | 99         | 557.2808 | 2        | 58.35  | 1112.5503 | -3.0      |      |
|                     | SFAMFSFFMK          | 99         | 637.289  | 2        | 74.14  | 1272.5671 | -2.9      |      |
|                     | PGMFWMWLWK          | 99         | 706.8334 | 2        | 95.67  | 1411.657  | -3.3      |      |
|                     | WLSFYTWLMK          | 99         | 695.3535 | 2        | 96.36  | 1388.6951 | -2.0      |      |
|                     | WPWGPLYFFK          | 99         | 703.3566 | 2        | 102.96 | 1404.7019 | -2.3      |      |
|                     | FYSFPWYWWK          | 98         | 754.8597 | 2        | 102.38 | 1507.7078 | -1.9      |      |
|                     | FFLDVMDFWK          | 97         | 681.8289 | 2        | 100.71 | 1361.6477 | -3.2      |      |
|                     | FDLEDYANEK          | 96         | 621.7835 | 2        | 57.45  | 1241.5564 | -3.2      |      |
|                     | WYPFFFYMWK          | 96         | 765.3535 | 2        | 101.75 | 1528.7002 | -5.1      |      |
|                     | TGDLADYAVK          | 94         | 526.275  | 2        | 42.13  | 1050.5347 | 0.8       |      |
|                     | WWFYLLNKK           | 94         | 723.3702 | 2        | 97.58  | 1444.7292 | -2.3      |      |
|                     | YFQPLMLWKK          | 93         | 713.8692 | 2        | 97.4   | 1425.7268 | -2.1      |      |
|                     | FFNVWVWRLK          | 92         | 481.2654 | 3        | 92.39  | 1440.782  | -5.3      |      |
|                     | FSDLEDYSTK          | 91         | 602.278  | 2        | 44.9   | 1202.5454 | -3.4      |      |
|                     | MGNWYFYWLK          | 89         | 711.8342 | 2        | 89.89  | 1421.6592 | -3.8      |      |
|                     | WMMFYWNLFK          | 89         | 748.8447 | 2        | 96     | 1495.678  | -2.1      |      |
|                     | PVDWPDYAAK          | 88         | 580.7887 | 2        | 52.13  | 1159.5662 | -2.9      |      |
|                     | PVDWDPAYAK          | 88         | 580.7891 | 2        | 52.75  | 1159.5662 | -2.2      |      |
|                     | WWFQYLNMFK          | 87         | 739.3563 | 2        | 95.78  | 1476.7012 | -2.1      |      |
|                     | NLWVFYSYWK          | 86         | 702.8549 | 2        | 94.76  | 1403.7026 | -5.2      |      |
|                     | MMDWPDYAVK          | 84         | 643.7786 | 2        | 51.32  | 1285.5471 | -3.4      |      |
|                     | SDLQDYSFMK          | 83         | 624.7806 | 2        | 46.82  | 1247.5493 | -2.2      |      |
|                     | FWQVWLQQFK          | 83         | 748.381  | 2        | 96.67  | 1494.7561 | -5.7      |      |
|                     | DYDRYADTFK          | 82         | 431.5335 | 3        | 51.22  | 1291.5833 | -3.5      |      |
|                     | WFLLLWNDWKK         | 82         | 498.2538 | 3        | 88.27  | 1491.7451 | -3.8      |      |
|                     | DHWTFFADLWK         | 81         | 439.8813 | 3        | 45.57  | 1316.6301 | -6.1      |      |
|                     | 2 x 10 <sup>8</sup> | MDMEDYAAK  | 99       | 626.2372 | 2      | 21.55     | 1250.4617 | -1.5 |
|                     |                     | MADLMDYAGK | 99       | 573.2504 | 2      | 33.26     | 1144.4893 | -2.6 |
| GMDVVDYAAK          |                     | 99         | 542.2585 | 2        | 35.34  | 1082.5066 | -3.7      |      |
| PDLEDYAVKK          |                     | 99         | 392.8791 | 3        | 35.98  | 1175.6187 | -2.8      |      |
| LEDVGDYAAK          |                     | 99         | 540.2714 | 2        | 36.97  | 1078.5295 | -1.3      |      |
| PADLPDYAQK          |                     | 99         | 558.7861 | 2        | 37.23  | 1115.561  | -3.0      |      |
| FDMQDYAYMK          |                     | 99         | 671.7743 | 2        | 38.65  | 1341.5369 | -2.1      |      |
| TSDLEDYAMK          |                     | 99         | 594.2643 | 2        | 40.24  | 1186.5176 | -3.0      |      |
| ATDMVDYAFK          |                     | 99         | 588.2723 | 2        | 41.38  | 1174.533  | -2.4      |      |
| LGDLMDYSEK          |                     | 99         | 593.2747 | 2        | 41.38  | 1184.5383 | -3.0      |      |
| ADLQDYAAVK          |                     | 99         | 546.7863 | 2        | 43.23  | 1091.561  | -2.8      |      |
| VFDLHDYASK          |                     | 99         | 398.5351 | 3        | 45.44  | 1192.5876 | -3.4      |      |
| WSDVEDYAAK          |                     | 99         | 591.7742 | 2        | 46.92  | 1181.5352 | -1.2      |      |
| MEDFVDYADK          |                     | 99         | 624.2651 | 2        | 49     | 1246.5176 | -1.6      |      |
| YEDLEDYAAK          |                     | 99         | 608.279  | 2        | 49.59  | 1214.5454 | -1.6      |      |
| SPDLEDYAYK          |                     | 99         | 600.2814 | 2        | 50.67  | 1198.5505 | -1.9      |      |

|             |    |          |   |       |           |      |
|-------------|----|----------|---|-------|-----------|------|
| ALQDLQDYAK  | 99 | 582.3048 | 2 | 51.28 | 1162.5981 | -2.6 |
| FMMDLEDYAK  | 99 | 647.2767 | 2 | 52.3  | 1292.5417 | -2.2 |
| LDLPDYAFHK  | 99 | 406.5477 | 3 | 53.29 | 1216.624  | -2.3 |
| ADWRDYADLK  | 99 | 417.8743 | 3 | 54.23 | 1250.6042 | -2.6 |
| WFDTTDYADK  | 99 | 630.7792 | 2 | 54.68 | 1259.5459 | -1.7 |
| LTDLQDYSFK  | 99 | 614.8128 | 2 | 55.26 | 1227.6135 | -2.0 |
| YEDVLDYADK  | 99 | 615.2884 | 2 | 56.05 | 1228.561  | 1.0  |
| LNDLPDYSFK  | 99 | 605.8074 | 2 | 56.54 | 1209.603  | -2.2 |
| YFDVEDYAAK  | 99 | 610.2838 | 2 | 57.97 | 1218.5557 | -2.1 |
| PWDVQDYAYK  | 99 | 642.3043 | 2 | 58.06 | 1282.5981 | -3.2 |
| FADWEDYANK  | 99 | 629.2789 | 2 | 58.03 | 1256.5461 | -2.4 |
| LMDLEDYAFK  | 99 | 630.3009 | 2 | 62.3  | 1258.5903 | -2.4 |
| VDLEDYANFK  | 99 | 606.7968 | 2 | 62.97 | 1211.5823 | -2.6 |
| FFDVQDYAYK  | 99 | 647.8066 | 2 | 65.85 | 1293.603  | -3.3 |
| FFDLEDYSVK  | 99 | 631.3069 | 2 | 71.36 | 1260.6025 | -2.5 |
| YFWWQYMMYK  | 99 | 788.84   | 2 | 75.7  | 1575.668  | -1.6 |
| WFDAQLLVFK  | 99 | 633.3539 | 2 | 87.77 | 1264.6968 | -2.8 |
| YADAHDYAFK  | 98 | 400.5195 | 3 | 32.45 | 1198.5408 | -3.4 |
| PLVDVHDYAK  | 98 | 385.8754 | 3 | 40.45 | 1154.6084 | -3.6 |
| LDKVDYADWK  | 98 | 417.8819 | 3 | 45.44 | 1250.6294 | -4.3 |
| EFDLHDYATK  | 98 | 413.1983 | 3 | 45.91 | 1236.5774 | -3.4 |
| WDLEDYSEHK  | 98 | 440.8651 | 3 | 47.13 | 1319.5781 | -3.5 |
| QADVWDYAAK  | 98 | 583.2838 | 2 | 52.01 | 1164.5564 | -3.0 |
| YFDVADYASK  | 98 | 589.2786 | 2 | 56.58 | 1176.5452 | -2.2 |
| QDFPDYADFK  | 98 | 622.7811 | 2 | 61.08 | 1243.551  | -2.7 |
| EVDLVDYAAK  | 98 | 561.2945 | 2 | 65.07 | 1120.5764 | -1.8 |
| EFDLADYSWK  | 98 | 636.7969 | 2 | 74.66 | 1271.5823 | -2.4 |
| KGDLHDYAFK  | 97 | 398.2073 | 3 | 25.99 | 1191.6035 | -2.9 |
| LGMPDYAAK   | 97 | 548.26   | 2 | 27.34 | 1094.5066 | -1.0 |
| MDEDYAAFQK  | 97 | 616.764  | 2 | 41.17 | 1231.5178 | -3.6 |
| ALDVPDYAGK  | 97 | 524.2769 | 2 | 44.54 | 1046.5396 | -0.3 |
| DVHDYAHFWK  | 97 | 439.5427 | 3 | 50.09 | 1315.6099 | -2.7 |
| VDVTDYAEFK  | 97 | 593.2922 | 2 | 56.81 | 1184.5713 | -1.2 |
| LFDVEDYADK  | 97 | 607.2896 | 2 | 60.86 | 1212.5662 | -1.3 |
| YTDLWDYAEK  | 97 | 651.8024 | 2 | 67.33 | 1301.5928 | -1.9 |
| YWPFLLWYAMK | 97 | 710.3473 | 2 | 90.39 | 1418.6846 | -3.2 |
| LMDFQDYAHK  | 96 | 428.1992 | 3 | 37.77 | 1281.5813 | -4.3 |
| LDKPDYAQFK  | 96 | 408.5505 | 3 | 38.33 | 1222.6345 | -3.9 |
| LTDVDPYASK  | 96 | 554.2863 | 2 | 38.55 | 1106.5608 | -2.6 |
| EVEDYASTMK  | 96 | 594.2637 | 2 | 39.58 | 1186.5176 | -3.9 |
| ALDLKDAYAK  | 96 | 553.8118 | 2 | 40.57 | 1105.613  | -3.6 |
| WTDLPDYSHK  | 96 | 420.8703 | 3 | 40.62 | 1259.5935 | -3.4 |
| KLENDYAEK   | 96 | 407.8857 | 3 | 42.41 | 1220.6401 | -4.0 |
| MEDAADYAWK  | 96 | 607.759  | 2 | 43.56 | 1213.5073 | -3.2 |
| WDDFKDYADK  | 96 | 434.5298 | 3 | 48.05 | 1300.5723 | -3.6 |
| EDLPDYAFPK  | 96 | 597.2949 | 2 | 58.3  | 1192.5764 | -1.0 |
| WFWYTHPQFK  | 96 | 719.8552 | 2 | 63.54 | 1437.6982 | -1.7 |
| DLHDYAHTLK  | 95 | 404.5423 | 3 | 32.42 | 1210.6094 | -3.5 |
| EVDVKDYAYK  | 95 | 410.2103 | 3 | 37.81 | 1227.6135 | -3.6 |
| LGDMFDYAAK  | 95 | 573.2719 | 2 | 44.15 | 1144.5222 | 6.1  |
| WQDMDPYAFK  | 95 | 658.2911 | 2 | 52.13 | 1314.5703 | -2.0 |
| DGVMDYAAPK  | 94 | 541.2529 | 2 | 27.33 | 1080.491  | 0.2  |

|             |    |          |   |       |           |      |
|-------------|----|----------|---|-------|-----------|------|
| LVDMDMYAMK  | 94 | 632.2737 | 2 | 28.45 | 1262.5344 | -1.2 |
| TMLDMDPYAK  | 94 | 608.2714 | 2 | 32.6  | 1214.5312 | -2.5 |
| YVDKVDYAFK  | 94 | 416.2185 | 3 | 40.85 | 1245.6394 | -4.5 |
| EDMPDYAVWK  | 94 | 634.7835 | 2 | 52.89 | 1267.5542 | -1.4 |
| FDVWDYAQVK  | 94 | 635.3154 | 2 | 73.66 | 1268.6189 | -2.1 |
| VMLDKVDYAK  | 93 | 399.5481 | 3 | 30.86 | 1195.6272 | -4.0 |
| VEGDLPDYAK  | 93 | 553.2777 | 2 | 40.46 | 1104.5452 | -3.9 |
| FDYEDYARAK  | 93 | 426.2018 | 3 | 41.61 | 1275.5884 | -3.8 |
| EVADYADTVK  | 93 | 555.2762 | 2 | 53.65 | 1108.54   | -1.9 |
| MLDVYDSFWK  | 93 | 659.8082 | 2 | 67.18 | 1317.6064 | -3.5 |
| ELDMHDYAVK  | 92 | 412.5279 | 3 | 25.75 | 1234.5652 | -2.6 |
| DLADYADKAK  | 92 | 554.784  | 2 | 37.8  | 1107.5559 | -2.2 |
| WDVMDYAKAK  | 92 | 414.5361 | 3 | 39.32 | 1240.5911 | -3.7 |
| WSDLKDYAAK  | 92 | 399.2063 | 3 | 40.91 | 1194.6033 | -5.3 |
| YMDLVDYESK  | 92 | 639.2874 | 2 | 47.14 | 1276.5645 | -3.3 |
| EGVQDYASWK  | 92 | 591.2805 | 2 | 49.56 | 1180.5513 | -4.2 |
| VVDLADYSYK  | 92 | 586.3027 | 2 | 53.58 | 1170.592  | -1.0 |
| FDVDPYAYYK  | 92 | 640.3033 | 2 | 64.01 | 1278.592  | 0.1  |
| MPDVDMYAAK  | 91 | 586.2582 | 2 | 33.01 | 1170.5049 | -2.6 |
| HVDWKDYAEK  | 91 | 430.5456 | 3 | 36.34 | 1288.6201 | -3.9 |
| FADADPYAYK  | 91 | 580.2725 | 2 | 44.86 | 1158.5344 | -3.5 |
| DKQDYAALFK  | 91 | 599.3159 | 2 | 49.57 | 1196.6189 | -1.3 |
| VYDVEDYSYK  | 91 | 640.2941 | 2 | 49.97 | 1278.5769 | -2.6 |
| WDQHDYAFK   | 91 | 441.2174 | 3 | 55.99 | 1320.625  | 4.1  |
| EVADYADMFK  | 91 | 602.2693 | 2 | 60.99 | 1202.5278 | -3.2 |
| WFWFGWMPK   | 91 | 743.3563 | 2 | 93.08 | 1484.6853 | 8.5  |
| YHDLDPYAHK  | 90 | 419.8707 | 3 | 26.02 | 1256.5938 | -2.7 |
| VDKEDYAMLK  | 90 | 409.5404 | 3 | 26.83 | 1225.6013 | -1.6 |
| LDDMENYAVK  | 90 | 606.7806 | 2 | 30.88 | 1211.5493 | -2.1 |
| MNDLDPYATK  | 90 | 591.7748 | 2 | 36.49 | 1181.5386 | -2.9 |
| YPYDVPDYAK  | 90 | 615.2946 | 2 | 53.21 | 1228.5764 | -1.4 |
| YYDLDPYAFK  | 90 | 647.3102 | 2 | 68.1  | 1292.6077 | -1.3 |
| PVDEMDYAEK  | 89 | 606.2648 | 2 | 24.97 | 1210.5176 | -2.1 |
| LMRDVPDYSK  | 89 | 413.5437 | 3 | 26.25 | 1237.6125 | -2.7 |
| FVQDMDEYAK  | 89 | 630.7797 | 2 | 32.16 | 1259.5493 | -3.5 |
| YFDKVDYAEK  | 89 | 426.2108 | 3 | 36.71 | 1275.6135 | -2.4 |
| GPDMDYAFK   | 89 | 594.255  | 2 | 36.97 | 1186.4963 | -0.7 |
| HDLDPYAYYK  | 89 | 642.3045 | 2 | 44.78 | 1282.5981 | -2.9 |
| DYHDSFHWWYK | 89 | 466.2057 | 3 | 48.2  | 1395.5996 | -3.1 |
| MFDLRDYAAK  | 89 | 415.5401 | 3 | 49.53 | 1243.6018 | -2.6 |
| FWDLMDYANK  | 89 | 659.2991 | 2 | 66.1  | 1316.5859 | -1.7 |
| MLKDVDYSYK  | 88 | 426.2114 | 3 | 32.74 | 1275.6169 | -3.6 |
| GPDVEDYAVK  | 88 | 546.2699 | 2 | 40.24 | 1090.5295 | -3.9 |
| FDFDLDPYSK  | 88 | 623.2931 | 2 | 73.14 | 1244.5713 | 0.3  |
| YDVVWYSESK  | 87 | 425.5369 | 3 | 36.22 | 1273.5979 | -7.1 |
| TMTDLQDYAK  | 87 | 600.7798 | 2 | 38.25 | 1199.5493 | -3.5 |
| YLDTHDAYFK  | 87 | 424.5388 | 3 | 42.88 | 1270.5981 | -2.8 |
| WMDLPDAYTK  | 87 | 627.7938 | 2 | 54.45 | 1253.575  | -1.5 |
| YFMDWPDYAK  | 87 | 675.7944 | 2 | 63.97 | 1349.575  | -0.5 |
| FADLHDYESK  | 86 | 408.5265 | 3 | 35.5  | 1222.5618 | -3.3 |
| NDLHDYSYLK  | 86 | 422.8735 | 3 | 40.98 | 1265.604  | -4.2 |
| LPHHDYFSK   | 85 | 419.8711 | 3 | 27.22 | 1256.5938 | -1.8 |

|            |    |          |   |       |           |      |
|------------|----|----------|---|-------|-----------|------|
| PTDLQDFSNK | 85 | 582.2871 | 2 | 35.6  | 1162.5618 | -1.8 |
| FFDMKDYAEK | 85 | 436.8674 | 3 | 36.41 | 1307.5857 | -4.0 |
| TQDLKDYAFK | 85 | 409.8821 | 3 | 40.3  | 1226.6294 | -4.1 |
| LQDVEDVYSK | 85 | 597.8018 | 2 | 40.86 | 1193.5928 | -3.2 |
| PVDWKDYAEK | 85 | 417.2105 | 3 | 46.16 | 1248.6138 | -3.2 |
| TTWVVEDAYK | 85 | 613.7865 | 2 | 56.7  | 1225.5615 | -2.5 |
| EVWDYADPK  | 85 | 618.7792 | 2 | 69    | 1235.5459 | -1.7 |
| FFWYYYGPWK | 85 | 728.3517 | 2 | 89.06 | 1454.6812 | 5.3  |
| WLMAFWPTWK | 85 | 690.8472 | 2 | 91.59 | 1379.6848 | -3.6 |
| KDVHDYAYLK | 84 | 417.5548 | 3 | 27.41 | 1249.6455 | -2.3 |
| YPDVHDAYVK | 84 | 402.5348 | 3 | 40    | 1204.5876 | -4.2 |
| PWKDNEYSFK | 84 | 438.2135 | 3 | 40.62 | 1311.6248 | -4.6 |
| KAQNLQDYAK | 84 | 393.2144 | 3 | 43.78 | 1176.625  | -3.2 |
| KSWDPADYAK | 84 | 393.863  | 3 | 45.06 | 1178.572  | -4.0 |
| WPKADYAWK  | 84 | 426.8791 | 3 | 50.01 | 1277.6194 | -3.2 |
| FWNDAEDYAK | 84 | 629.2795 | 2 | 53.37 | 1256.5461 | -1.3 |
| FWYYTPWWSK | 84 | 731.8497 | 2 | 88.74 | 1461.687  | -1.5 |
| KDVYDRMQQK | 83 | 442.558  | 3 | 21.9  | 1324.6558 | -2.7 |
| MMDVADYSSK | 83 | 589.2455 | 2 | 25.05 | 1176.479  | -2.1 |
| PVPDMDPYAK | 83 | 574.2748 | 2 | 31.35 | 1146.5378 | -2.4 |
| DLPDYAVSRK | 83 | 581.8119 | 2 | 37.9  | 1161.6143 | -4.3 |
| DMDVDRYAWK | 83 | 438.5354 | 3 | 44.33 | 1312.5869 | -1.9 |
| VVDVNGYEYK | 83 | 592.7996 | 2 | 44.74 | 1183.5874 | -2.4 |
| MDLHDYADFK | 83 | 423.8558 | 3 | 45.75 | 1268.5496 | -3.1 |
| WDFKDYADK  | 83 | 434.2006 | 3 | 47.94 | 1299.5884 | -6.5 |
| YLDWADFSEK | 83 | 636.7968 | 2 | 66.25 | 1271.5823 | -2.6 |
| WMWNAWYWP  | 83 | 741.8414 | 2 | 91.77 | 1481.6704 | -1.4 |
| DLHDYADLSK | 82 | 588.2863 | 2 | 43.31 | 1174.5618 | -3.2 |
| LMDMPDYANK | 81 | 614.7694 | 2 | 28.9  | 1227.5264 | -1.7 |
| HDWNEYAAAK | 81 | 602.2785 | 2 | 36.11 | 1202.5469 | -3.7 |
| VFDVHDEYSK | 81 | 413.1984 | 3 | 37.4  | 1236.5774 | -3.3 |
| SMDLEDYAMK | 81 | 617.257  | 2 | 40.8  | 1232.5054 | -4.9 |
| ADHSEYSFFK | 81 | 410.523  | 3 | 43.39 | 1228.5513 | -3.4 |

List of all sequences (ALC score  $\geq 80$ ) identified from selections performed with  $2 \times 10^6$ ,  $2 \times 10^7$ , and  $2 \times 10^8$ -member libraries against 12ca5 (one replicate shown). Sequences are separated by the library they were discovered from and listed by decreasing ALC score.



**Supplementary Table 3. Replicate selections from a  $2 \times 10^8$ -member library identify similar populations of 12ca5-binding peptides.**

| Number of replicates in which a DxxDY(A/S)-containing sequence was identified | Count | Percent |
|-------------------------------------------------------------------------------|-------|---------|
| 3                                                                             | 46    | 30.7    |
| 2                                                                             | 43    | 28.7    |
| 1                                                                             | 61    | 40.7    |

Out of three replicate selections from a  $2 \times 10^8$ -member library for 12ca5 binding, approximately 60% of DXXDY(A/S)-containing sequences are identified in multiple replicates, suggesting that similar (although not identical) populations of 12ca5-binding peptides are reproducibly identified. In total, 150 DXXDY(A/S)-containing sequences were obtained.

**Supplementary Table 4. Use of a precursor selection threshold modulates enrichment based on sample loading.**

| Peptide     | ALC (%) | RT    | Mass      | ppm  | MS signal (8 fmol) | Max NL (75 fmol) |
|-------------|---------|-------|-----------|------|--------------------|------------------|
| MNDLVDYADK  | 99      | 41.83 | 1197.5337 | -7.7 | 2.40E+05           | 2.45E+06         |
| WDFWYFYGYK  | 99      | 92.25 | 1472.6553 | -8.3 | 2.02E+04           | 2.07E+05         |
| WFNFWGWEMK  | 99      | 85.67 | 1444.6387 | -6.4 | 2.50E+04           | 1.61E+05         |
| PDVHDYTWGK  | 99      | 35.24 | 1215.5671 | -7.5 | 1.67E+04           | 9.83E+04         |
| YLMYPWWLWK  | 99      | 88.72 | 1499.7424 | -6   | 1.34E+04           | 9.65E+04         |
| FYQWYYSWFK  | 99      | 85.74 | 1515.6975 | -5.9 | 1.46E+04           | 8.16E+04         |
| FLWYDYWFYK  | 99      | 94.22 | 1528.718  | -6.9 | 1.44E+04           | 7.82E+04         |
| WYWMYYWPSK  | 99      | 79.77 | 1523.6697 | -7.2 | 1.33E+04           | 6.10E+04         |
| YTGFTWFWWK  | 99      | 91.77 | 1419.6765 | -6.4 | 9.30E+03           | 5.75E+04         |
| NFQWMMWFK   | 98      | 93.56 | 1533.6687 | -7.6 | 1.89E+04           | 7.75E+04         |
| FFWNNMLWPK  | 98      | 91.98 | 1468.7114 | -5.8 | 7.54E+03           | 6.84E+04         |
| FWNFFYSWYK  | 98      | 94.75 | 1485.687  | -5.2 | 6.71E+03           | 6.46E+04         |
| WDFWYFYGYK  | 97      | 89.85 | 1472.6553 | -6.5 | 2.54E+04           | 1.11E+05         |
| DMWPWWWMWK  | 96      | 92.51 | 1581.6687 | -6.3 | 9.28E+03           | 7.25E+04         |
| WWEMWPWDYK  | 96      | 86.16 | 1540.6599 | -6.5 | 1.10E+04           | 5.98E+04         |
| FTPWWLWGFK  | 95      | 94.93 | 1365.7021 | -6.5 | 1.47E+04           | 7.94E+04         |
| AFQGWWWYYK  | 95      | 79.68 | 1432.6716 | -6.5 | 9.50E+03           | 6.03E+04         |
| PYYYPVWWWK  | 94      | 84.9  | 1485.7234 | -6.4 | 1.21E+04           | 6.32E+04         |
| MWAYWFSWPK  | 94      | 84.61 | 1415.6484 | -6.2 | 1.04E+04           | 5.87E+04         |
| WWFDWAYLAK  | 94      | 97.23 | 1383.6765 | -6.5 | 5.26E+03           | 5.62E+04         |
| YFTWPAYWVK  | 91      | 87.5  | 1445.6921 | -8   | 1.26E+04           | 6.34E+04         |
| HPWFWWLTYK  | 90      | 77.3  | 1461.7346 | -5.7 | 1.53E+04           | 1.01E+05         |
| FWWQYATMWK  | 90      | 81.90 | 1460.6699 | -9.0 | 1.42E+04           | 5.45E+04         |
| WPYPFWLHK   | 89      | 74.77 | 1457.7397 | -6.5 | 8.48E+03           | 8.07E+04         |
| WWQWWMAGYK  | 89      | 77.07 | 1455.6545 | -6.5 | 7.60E+03           | 5.27E+04         |
| FWWLMYPWGK  | 88      | 92.44 | 1427.6848 | -8.3 | 1.77E+04           | 5.60E+04         |
| FWYFPWAWQK  | 88      | 91.3  | 1456.708  | -7.1 | 8.46E+03           | 5.54E+04         |
| NYWWFYMFVK  | 87      | 87.32 | 1495.6748 | -7.3 | 9.70E+03           | 8.02E+04         |
| ENDWQDYSHK  | 87      | 28.73 | 1319.553  | -7.5 | 1.10E+04           | 6.48E+04         |
| WMQYWMWFK   | 86      | 81.78 | 1564.6631 | -8.3 | 8.94E+03           | 5.27E+04         |
| YYWVWFVWNGK | 85      | 88.53 | 1446.6873 | -4.2 | 1.05E+04           | 6.64E+04         |
| PYFWMYDVK   | 85      | 80.32 | 1512.6536 | -6.4 | 9.56E+03           | 6.03E+04         |
| WGWVFEEMFK  | 84      | 86.53 | 1459.6384 | -7.4 | 8.70E+03           | 5.11E+04         |
| FYWPMWFFVK  | 81      | 94.77 | 1462.6897 | -6.5 | 8.76E+03           | 7.39E+04         |
| LVVFAWMYNK  | 81      | 63.84 | 1284.6689 | -6.7 | 1.02E+04           | 5.86E+04         |

At low sample loading, use of a precursor selection threshold of  $5 \times 10^4$  yielded only one identified sequence (MNDLVDYADK). At high sample loading, two additional DXXDY-containing sequences were identified, along with 32 non-motif-containing sequences. MS signal is reported as the apex of extracted ion chromatograms.

**Supplementary Table 5. Selections against 12ca5 identify a decreasing number of motif-containing sequences as library size is increased from 10<sup>8</sup> to 10<sup>9</sup>.**

| <b>Library size</b> | <b>[Library member]</b> | <b>ALC score cutoff</b> | <b>Total sequences identified</b> | <b>Motif-containing sequences</b> | <b>Percent</b> |
|---------------------|-------------------------|-------------------------|-----------------------------------|-----------------------------------|----------------|
| 10 <sup>8</sup>     | 10 pM                   | ≥ 80                    | 257                               | 183                               | 71.2           |
| 10 <sup>8</sup>     | 2 pM                    | ≥ 80                    | 242                               | 131                               | 54.1           |
| 10 <sup>9</sup>     | 2 pM                    | ≥ 80                    | 34                                | 21                                | 61.8           |

An approximate 9-fold drop in the number of 12ca5-binding sequences is observed from one-pot selections of a 10<sup>9</sup>-member library relative to a 10<sup>8</sup>-member library. Selections were performed near the solubility limit of the libraries (1-2 mM), and variable member concentration.

**Supplementary Table 6. Increasing scale of 10<sup>9</sup>-member library selections does not restore recovery of 12ca5-binding peptides.**

| <b>Library size</b> | <b>Starting material per member</b> | <b>Total sequences identified</b> | <b>Motif-containing sequences</b> | <b>Percent</b> |
|---------------------|-------------------------------------|-----------------------------------|-----------------------------------|----------------|
| 10 <sup>9</sup>     | 1 fmol                              | 7                                 | 4                                 | 57.1           |
|                     | 5 fmol                              | 15                                | 10                                | 66.7           |
|                     | 12 fmol                             | 8                                 | 7                                 | 87.5           |

An increase in the amount of each library member present in the selection did not yield an increase in the number of sequences bearing the characteristic DXXDY(A/S) motif, suggesting that the decreased number of 12ca5-binding sequences identified is not due to material limitation.

**Supplementary Table 7. Ten-fold increase in 12ca5 in selections from a 10<sup>9</sup>-member library does not restore recovery of 12ca5-binding peptides.**

|                                        | <b>0.1 <math>\mu</math>M 12ca5</b> | <b>1 <math>\mu</math>M 12ca5</b> |
|----------------------------------------|------------------------------------|----------------------------------|
| <b>Amount of 12ca5 (nmol):</b>         | 0.13                               | 1.3                              |
| <b>DXXY(A/S)-containing sequences:</b> | 26                                 | 0                                |
| <b>Total sequences:</b>                | 52                                 | 18                               |
| <b>Percent motif-containing:</b>       | 50%                                | 0%                               |

Increasing the amount and concentration of 12ca5 10x (from 0.1 nmol/0.1  $\mu$ M to 1 nmol/1 $\mu$ M) abrogated identification of DXXDY(A/S)-containing peptides.

**Supplementary Table 8. Peptides identified in presence of high exogenous competitor exhibit generally stronger signal intensities than those identified only in the presence of low exogenous competitor.**

| Peptide    | ALC (%) | RT    | Mass (Da) | Ppm  | MS signal (1 nM HA) | Identified in presence of 100 nM HA? | Average Max NL ( $\pm$ Std. Dev.) |
|------------|---------|-------|-----------|------|---------------------|--------------------------------------|-----------------------------------|
| MDMEDYAAMK | 99      | 20.93 | 1250.4617 | -4.5 | 7.25E+05            | Yes                                  | 1.17E+06 $\pm$ 4.6E+05            |
| PVDMEDYAEK | 99      | 23.17 | 1210.5176 | -3.1 | 1.17E+06            |                                      |                                   |
| TWDRPDYADK | 99      | 27.89 | 1264.5837 | -4.9 | 2.17E+06            |                                      |                                   |
| YFDVEDYAAK | 99      | 47.82 | 1218.5557 | -4.8 | 9.64E+05            |                                      |                                   |
| LMDLEDYAFK | 99      | 51.71 | 1258.5903 | -5.5 | 1.30E+06            |                                      |                                   |
| YEDLEDYAAK | 98      | 40.25 | 1214.5454 | -5.3 | 6.85E+05            |                                      |                                   |
| LTDVDPYASK | 93      | 32.75 | 1106.5608 | -2.9 | 1.20E+06            |                                      |                                   |
| PTDVMDYASK | 99      | 25.9  | 1140.5122 | -2.7 | 2.94E+05            | No                                   | 5.69E+05 $\pm$ 2.6E+05            |
| HDWQDYAAK  | 99      | 31.7  | 1202.5469 | -4.1 | 6.90E+05            |                                      |                                   |
| TMTDLQDYAK | 99      | 33.39 | 1199.5493 | -3.9 | 3.70E+05            |                                      |                                   |
| MSDLEDYAMK | 99      | 34.75 | 1232.5054 | -2.8 | 2.52E+05            |                                      |                                   |
| HDLDPYAYK  | 99      | 37.85 | 1282.5981 | -5   | 8.43E+05            |                                      |                                   |
| SPDLEDYAYK | 99      | 42.37 | 1198.5505 | -4.7 | 7.16E+05            |                                      |                                   |
| YVDWQDYADK | 98      | 48.38 | 1300.5725 | -6   | 5.42E+05            |                                      |                                   |
| LGDYADYAAK | 96      | 35.36 | 1084.5188 | -5.5 | 1.96E+05            |                                      |                                   |
| GPDVEDYAVK | 95      | 34.96 | 1090.5295 | -6.1 | 9.65E+05            |                                      |                                   |
| LNDLPDYAYK | 91      | 48    | 1209.603  | -5.7 | 7.00E+05            |                                      |                                   |
| HADMWDYADK | 88      | 33.55 | 1265.5134 | -4.6 | 3.76E+05            |                                      |                                   |
| TDVRDYADYK | 81      | 32    | 1243.5833 | -5.2 | 8.85E+05            |                                      |                                   |

Seven DXXDYA-containing peptides were identified in the presence of 100 nM exogenous HA epitope, compared to 81 identified in the presence of 1 nM exogenous HA epitope (12 were randomly selected for analysis here). On average, peptides identified in the presence of greater exogenous competitor exhibited higher signal intensities than those only identified under less stringent conditions. MS signal is reported as the apex of extracted ion chromatograms.

**Supplementary Table 9. Sequence subtraction from side-by-side selections yields modestly improved enrichments.**

| <b>Processing method</b>            | <b>Total sequences identified (12ca5)</b> | <b>Motif-containing sequences</b> | <b>Percent</b> |
|-------------------------------------|-------------------------------------------|-----------------------------------|----------------|
| ALC $\geq$ 80<br>(no subtraction)   | 198                                       | 133                               | 67.2           |
| ALC $\geq$ 80<br>(with subtraction) | 181                                       | 133                               | 73.5           |

Shown are the number of DXXDY(A/S)-containing sequences and total sequences identified from side-by-side selections of a  $2 \times 10^8$ -member library against 12ca5 and polyclonal human IgG<sub>1</sub>. Selections were performed in triplicate, and unique sequences from the sum of these technical replicates are indicated. Subtracting out non-specific sequences (those identified in both conditions) improves identification of motif-containing sequences as a fraction of the total.

**Supplementary Table 10. Multi-pot selections against MDM2 identify p53-like peptides from a 10<sup>9</sup>-member library.**

| Name | Scan  | Peptide                                                                                                              | ALC (%) | m/z      | z | RT     | Mass      | ppm  |
|------|-------|----------------------------------------------------------------------------------------------------------------------|---------|----------|---|--------|-----------|------|
| 1.1  | 17209 | PSFHAVMWLKSEFK                                                                                                       | 99      | 394.9648 | 4 | 53.04  | 1575.8384 | -5.1 |
| 1.2  | 38696 | KADPWWLETFWVK                                                                                                        | 80      | 597.9682 | 3 | 85.91  | 1790.8933 | -5.9 |
| 2.1  | 43700 | LLFDFTYAKWLYK                                                                                                        | 95      | 569.6469 | 3 | 89.84  | 1705.9231 | -2.5 |
| 2.2  | 18425 | HRPEYAVSVLAAK                                                                                                        | 86      | 480.6077 | 3 | 45.79  | 1438.8044 | -2.3 |
| 2.3  | 31504 | <u>Y</u> <u>S</u> <u>F</u> <u>H</u> <u>Y</u> <u>W</u> <u>T</u> <u>Q</u> <u>L</u> <u>N</u> <u>E</u> <u>K</u>          | 80      | 900.9277 | 2 | 68.67  | 1799.842  | -0.6 |
| 3.1  | 25254 | VSHYWTAYVQWYK                                                                                                        | 92      | 865.4241 | 2 | 65.52  | 1728.8413 | -4.5 |
| 3.2  | 41789 | <u>P</u> <u>S</u> <u>F</u> <u>L</u> <u>D</u> <u>Y</u> <u>W</u> <u>K</u> <u>V</u> <u>V</u> <u>F</u> <u>Y</u> <u>K</u> | 90      | 564.3014 | 3 | 94.44  | 1689.8918 | -5.6 |
| 3.3  | 46448 | WWLWAYSYPQWVK                                                                                                        | 88      | 930.4522 | 2 | 99.85  | 1858.8984 | -4.6 |
| 3.4  | 47164 | FAWQPFQWVYNWK                                                                                                        | 87      | 943.4470 | 2 | 101.15 | 1884.8889 | -5.0 |
| 3.5  | 26639 | <u>K</u> <u>T</u> <u>F</u> <u>V</u> <u>E</u> <u>Y</u> <u>W</u> <u>N</u> <u>E</u> <u>L</u> <u>R</u> <u>V</u> <u>K</u> | 80      | 570.9803 | 3 | 67.94  | 1709.9253 | -3.7 |
| 4.1  | 49230 | <u>F</u> <u>T</u> <u>F</u> <u>L</u> <u>D</u> <u>Y</u> <u>W</u> <u>Q</u> <u>L</u> <u>L</u> <u>T</u> <u>G</u> <u>K</u> | 99      | 815.9340 | 2 | 110.13 | 1629.8555 | -1.2 |
| 4.2  | 37222 | <u>L</u> <u>T</u> <u>T</u> <u>F</u> <u>F</u> <u>D</u> <u>Y</u> <u>W</u> <u>N</u> <u>E</u> <u>L</u> <u>Y</u> <u>K</u> | 97      | 869.9229 | 2 | 101.54 | 1737.8403 | -5.2 |
| 4.3  | 43167 | FYALEYWQNFTDK                                                                                                        | 82      | 862.4064 | 2 | 97.87  | 1722.8042 | -3.4 |
| 4.4  | 8578  | ESMMYSHPQLFDK                                                                                                        | 80      | 548.5768 | 3 | 45.54  | 1642.7119 | -2.0 |
| 5.1  | 28399 | <u>F</u> <u>G</u> <u>G</u> <u>Y</u> <u>W</u> <u>W</u> <u>S</u> <u>Q</u> <u>L</u> <u>Y</u> <u>T</u> <u>Y</u> <u>K</u> | 95      | 849.4065 | 2 | 93.05  | 1696.8037 | -3.1 |
| 5.2  | 32707 | <u>F</u> <u>T</u> <u>F</u> <u>W</u> <u>D</u> <u>Y</u> <u>W</u> <u>T</u> <u>L</u> <u>Q</u> <u>N</u> <u>Y</u> <u>K</u> | 84      | 905.9298 | 2 | 103.55 | 1809.8516 | -3.6 |

List of all 16 sequences uniquely identified in the presence of MDM2. Selections were performed side-by-side with 12ca5 as a negative control. Sequences bearing the FXXXWXX(L/V) motif characteristic of MDM2-binding are indicated in purple. Sequences bearing the FXXXW motif, but may be mis-sequenced due to incomplete backbone fragmentation during MS/MS, are indicated in blue. Hot spot residues are underlined for clarity.



**Supplementary Table 11. Side-by-side selections against 14-3-3 $\gamma$  and 12ca5 identify 17 sequences pulled down uniquely in the presence of 14-3-3.**

| Construct | Sequence |              |              |     |      |              |              |              |              |     | ALC (%) |
|-----------|----------|--------------|--------------|-----|------|--------------|--------------|--------------|--------------|-----|---------|
| 14-3-3.1  | D-Leu    | Nph          | $\beta$ -Ser | Nph | pSer | Nph          | $\beta$ -Ser | $\beta$ -Ala | Nph          | Lys | 99      |
| 14-3-3.2  | Fph      | Nva          | Nph          | Fph | pSer | Cpa          | D-Gln        | Fph          | Fph          | Lys | 99      |
| 14-3-3.3  | Fph      | Fph          | Hyp          | Fph | pSer | Thz          | $\beta$ -Ser | $\beta$ -Ala | Nph          | Lys | 97      |
| 14-3-3.4  | Cha      | Cpa          | $\beta$ -Ser | Thz | pSer | Cha          | $\beta$ -Ser | Nph          | $\beta$ -Ala | Lys | 91      |
| 14-3-3.5  | Cha      | Cha          | $\beta$ -Ser | Fph | pSer | Thz          | $\beta$ -Ser | $\beta$ -Ala | Hyp          | Lys | 91      |
| 14-3-3.6  | Cha      | Cha          | $\beta$ -Ser | Orn | pSer | Nph          | $\beta$ -Ser | $\beta$ -Ser | Nph          | Lys | 90      |
| 14-3-3.7  | Cha      | Nph          | Hyp          | Fph | pSer | Thz          | $\beta$ -Thr | $\beta$ -Ala | Nph          | Lys | 85      |
| 14-3-3.8  | Cha      | Fph          | $\beta$ -Ser | Cpa | pSer | $\beta$ -Thr | Nph          | $\beta$ -Ala | Nph          | Lys | 85      |
| 14-3-3.9  | Thz      | Thz          | Hyp          | Thz | pSer | Nph          | $\beta$ -Ser | $\beta$ -Ser | Nph          | Lys | 85      |
| 14-3-3.10 | Cha      | $\beta$ -Ala | Nph          | Aph | pSer | Nva          | Aad          | D-Gln        | Nph          | Lys | 85      |
| 14-3-3.11 | D-Gln    | Cpa          | Nph          | Cpa | pSer | Fph          | $\beta$ -Ser | $\beta$ -Ala | Nph          | Lys | 84      |
| 14-3-3.12 | D-Lys    | Nva          | Nph          | Thz | pSer | Nph          | $\beta$ -Ser | $\beta$ -Ala | Nph          | Lys | 84      |
| 14-3-3.13 | Fph      | $\beta$ -Ser | Hyp          | Thz | pSer | Nph          | $\beta$ -Ser | $\beta$ -Ser | Nph          | Lys | 83      |
| 14-3-3.14 | Cha      | Cpa          | $\beta$ -Ser | Orn | pSer | Fph          | Cpa          | $\beta$ -Ser | Nph          | Lys | 82      |
| 14-3-3.15 | Cha      | $\beta$ -Ala | $\beta$ -Ser | Cpa | pSer | Fph          | $\beta$ -Ala | $\beta$ -Ala | Nph          | Lys | 81      |
| 14-3-3.16 | Cpa      | Fph          | Cha          | Thz | pSer | Thz          | Hyp          | Aph          | Hyp          | Lys | 81      |
| 14-3-3.17 | Cha      | Fph          | $\beta$ -Ser | Cpa | pSer | Aph          | $\beta$ -Ser | Aad          | Fph          | Lys | 81      |

List of all sequences identified in selections against 14-3-3 $\gamma$  that matched the library design with ALC  $\geq$  80. Residues held constant in the library are indicated in blue. Prominent amino acid motifs were identified, including a Cha-X- $\beta$ -Ser motif at the N-term, and an a  $\beta$ -Ser-( $\beta$ -Ala/ $\beta$ -Ser)-Nph motif at the C-term. Abbreviations:  $\beta$ -Ala =  $\beta$ -alanine;  $\beta$ -Ser =  $\beta$ -homoserine;  $\beta$ -Thr =  $\beta$ -homothreonine; Aad = amino adipic acid; Aph = 4-aminophenylalanine; Cha = cyclohexylalanine; Cpa = cyclopropylalanine; Fph = 4-fluorophenylalanine; Hyp = hydroxyproline; Nph = 4-nitrophenylalanine; Orn = ornithine; pSer = phosphoserine; Thz = thiazolylalanine.

**Supplementary Table 12. Data collection and refinement statistics for the 14-3-3 $\sigma$ ΔC/14-3-3.12 complex.**

| <b>PDB Code</b>                              | <b>6TCH</b>                   |
|----------------------------------------------|-------------------------------|
| <b>Data Collection</b>                       |                               |
| Wavelength                                   | 1.54                          |
| Resolution range                             | 33.24 - 1.80 (1.87 - 1.80)    |
| Space group                                  | C 2 2 21                      |
| Unit cell <i>a</i> , <i>b</i> , <i>c</i> (Å) | 82.4751<br>112.282<br>62.7582 |
| Unit cell $\alpha$ , $\beta$ , $\gamma$ (°)  | 90<br>90<br>90                |
| Total reflections                            | 167691 (6320)                 |
| Unique reflections                           | 27297 (2662)                  |
| Multiplicity                                 | 6.1 (4.8)                     |
| Completeness (%)                             | 99.89 (99.22)                 |
| Mean I/sigma(I)                              | 18.7 (5.5)                    |
| Wilson B-factor                              | 11.26                         |
| R-merge                                      | 0.069 (0.258)                 |
| R-meas                                       | 0.075 (0.289)                 |
| R-pim                                        | 0.030 (0.129)                 |
| CC1/2                                        | 0.998 (0.952)                 |
| <b>Refinement</b>                            |                               |
| Reflections used in refinement               | 27296 (2662)                  |
| Reflections used for R-free                  | 1377 (133)                    |
| R-work                                       | 0.1480 (0.1675)               |
| R-free                                       | 0.1838 (0.2365)               |
| Number of non-hydrogen atoms                 | 2375                          |
| macromolecules                               | 1930                          |
| ligands                                      | 94                            |
| solvent                                      | 351                           |
| Protein residues                             | 236                           |
| RMS(bonds)                                   | 0.009                         |
| RMS(angles)                                  | 1.11                          |
| Ramachandran favored (%)                     | 98.29                         |
| Ramachandran allowed (%)                     | 1.71                          |
| Ramachandran outliers (%)                    | 0.00                          |
| Rotamer outliers (%)                         | 0.50                          |
| Clashscore                                   | 1.28                          |
| Average B-factor                             | 15.84                         |
| macromolecules                               | 13.00                         |
| ligands                                      | 33.40                         |
| solvent                                      | 26.79                         |

### Supplementary References:

1. Mijalis, A. J. *et al.* A fully automated flow-based approach for accelerated peptide synthesis. *Nature Chemical Biology* **13**, 464–466 (2017).
2. Simon, M. D. *et al.* Rapid Flow-Based Peptide Synthesis. *ChemBioChem* **15**, 713–720 (2014).
3. Vinogradov, A. A. *et al.* Library Design-Facilitated High-Throughput Sequencing of Synthetic Peptide Libraries. *ACS Comb. Sci.* **19**, 694–701 (2017).
4. Hartrampf, N. *et al.* Synthesis of proteins by automated flow chemistry. *Science* **368**, 980–987 (2020).
5. de Vink, P. J. *et al.* A Binary Bivalent Supramolecular Assembly Platform Based on Cucurbit[8]uril and Dimeric Adapter Protein 14-3-3. *Angew Chem Int Ed Engl* **56**, 8998–9002 (2017).
6. Moriarty, N. W., Grosse-Kunstleve, R. W. & Adams, P. D. electronic Ligand Builder and Optimization Workbench (eLBOW): a tool for ligand coordinate and restraint generation. *Acta Crystallogr. D Biol. Crystallogr.* **65**, 1074–1080 (2009).
7. Emsley, P. & Cowtan, K. Coot: model-building tools for molecular graphics. *Acta Crystallogr. D Biol. Crystallogr.* **60**, 2126–2132 (2004).
8. Adams, P. D. *et al.* PHENIX: a comprehensive Python-based system for macromolecular structure solution. *Acta Crystallogr. D Biol. Crystallogr.* **66**, 213–221 (2010).
9. Afonine, P. V. *et al.* Towards automated crystallographic structure refinement with phenix.refine. *Acta Crystallogr. D Biol. Crystallogr.* **68**, 352–367 (2012).

10. Gates, Z. P. *et al.* Xenoprotein engineering via synthetic libraries. *PNAS* 201722633 (2018) doi:10.1073/pnas.1722633115.
